# Supplementary material for: Silver-catalyzed intermolecular amination of fluoroarenes
Source: Royal Society of Chemistry journal article supplement (doi:10.1039/c8ob01749b), 2018-01-01

## Supporting Information

### Silver-catalyzed intermolecular amination of fluoroarenes

Yu Wang,<sup>\*a</sup> Chenlong Wei,<sup>a</sup> Ruyun Tang,<sup>a</sup> Haosheng Zhan,<sup>a</sup> Jing Lin,<sup>a</sup> Zhenhua Liu,<sup>b</sup>

Weihua Tao<sup>a</sup> and Zhongxue Fang<sup>\*a</sup>

<sup>a</sup>School of Chemistry and Environmental Engineering, Yancheng Teachers University,

Yancheng City 224007, Jiangsu Province, People's Republic of China.

E-mail: fangzhongxue120@163.com

<sup>b</sup>College of Chemistry, Chemical Engineering and Materials Science, Shandong

Normal University, Jinan 250014, People's Republic of China.

## Contents

|                                                                                |     |
|--------------------------------------------------------------------------------|-----|
| Table of contents.....                                                         | S2  |
| 1. General information.....                                                    | S3  |
| 2. General procedures and characterization data for all reaction products..... | S3  |
| 3. References.....                                                             | S13 |
| 4. NMR spectra copies.....                                                     | S15 |

## 1. General information

Unless otherwise noted, all chemicals were purchased from commercial suppliers (Adamas, Aladdin, J&K etc) and used without further purification.  $^1\text{H}$  NMR and  $^{13}\text{C}$  NMR were recorded at ambient temperature on a 400 or 500 MHz spectrometer (100 or 125 MHz for  $^{13}\text{C}$  NMR). NMR experiments are reported in  $\delta$  units, parts per million (ppm), and were referenced to  $\text{CDCl}_3$  ( $\delta$  7.26 or 77.0 ppm) as the internal standard. The coupling constants  $J$  are given in Hertz. Mass spectra were recorded on BRUKER AutoflexIII Smartbeam MS-spectrometer. High resolution mass spectra (HRMS) were recorded on Bruker microTof by using ESI method. Column chromatography was performed using EM silica gel 60 (300–400 mesh).

## 2. General procedures and characterization data for all reaction products

### Synthesis of 4-acetylphenylsiluer

All experiments were carried out under dry, purified nitrogen using Schlenk-type glassware. Liquids were handled by syringe techniques. Solvents were purified, distilled under nitrogen, and stored under nitrogen over molecular sieves. Diphenylzinc was prepared as described by Knoche<sup>1</sup>. 1.0 g (5.9 mmol) of finely ground  $\text{AgNO}_3$  was added with stirring to a solution of 3.33 g (11.0 mmol) of  $(4\text{-CH}_3\text{COPh})_2\text{Zn}$  in 40 ml of diethyl ether at  $0^\circ\text{C}$ . A part-orange, part-white precipitate formed immediately. The orange colour disappeared after 2 h stirring and the amount of white precipitate correspondingly increased. After decantation of the green supernatant liquid, the solid was washed five times with 25 ml of diethyl ether and dried in vacuo.<sup>2</sup>

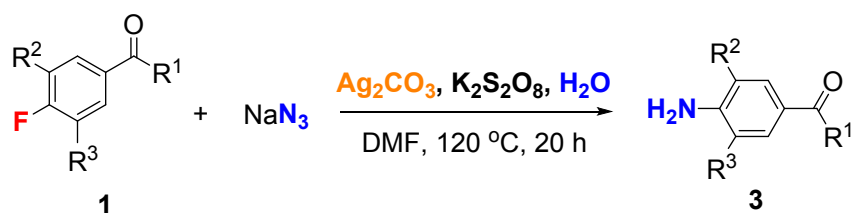

**Scheme S1**

The typical experimental procedure for synthesis of 4-aminoacetophenone **3a**: 4-fluoroacetophenone **1a** (0.4 mmol, 48.0μL), NaN<sub>3</sub> (1.2 mmol, 78.0 mg), Ag<sub>2</sub>CO<sub>3</sub> (0.04 mmol, 11.0 mg), K<sub>2</sub>S<sub>2</sub>O<sub>8</sub> (0.48 mmol, 129.7 mg), H<sub>2</sub>O (0.04 mmol, 7.2μL) and DMF (2 mL) were placed into a sealed dry tube (15 mL) with a magnetic stirrer bar. The reaction was heated under an air atmosphere at 120 °C for 20 h. After the reaction finished, the catalyst was separated by centrifugation and filtration to obtain the liquid phase. The pure product **3a** was obtained by flash column chromatography on silica gel by using petroleum ether (30-60 °C) and ethyl acetate as eluents (petroleum ether /ethyl acetate = 4/1).

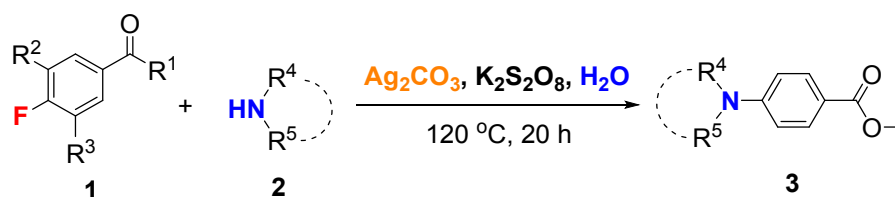

**Scheme S2**

The typical experimental procedure for synthesis of 4-aminoacetophenone **3m**: 4-fluoroacetophenone **1a** (0.4 mmol, 48.0μL), morpholine (0.5mL), Ag<sub>2</sub>CO<sub>3</sub> (0.04 mmol, 11.0 mg), K<sub>2</sub>S<sub>2</sub>O<sub>8</sub> (0.48 mmol, 129.7 mg) and H<sub>2</sub>O (0.04 mmol, 7.2 μL) were placed into a sealed dry tube (15 mL) with a magnetic stirrer bar. The reaction was heated under an air atmosphere at 120 °C for 20 h. After the reaction finished, the catalyst was separated by centrifugation and filtration to obtain the liquid phase. The pure product **3m** was obtained by flash column chromatography on silica gel by using petroleum ether (30-60 °C) and ethyl acetate as eluents (petroleum ether /ethyl acetate = 3/1).

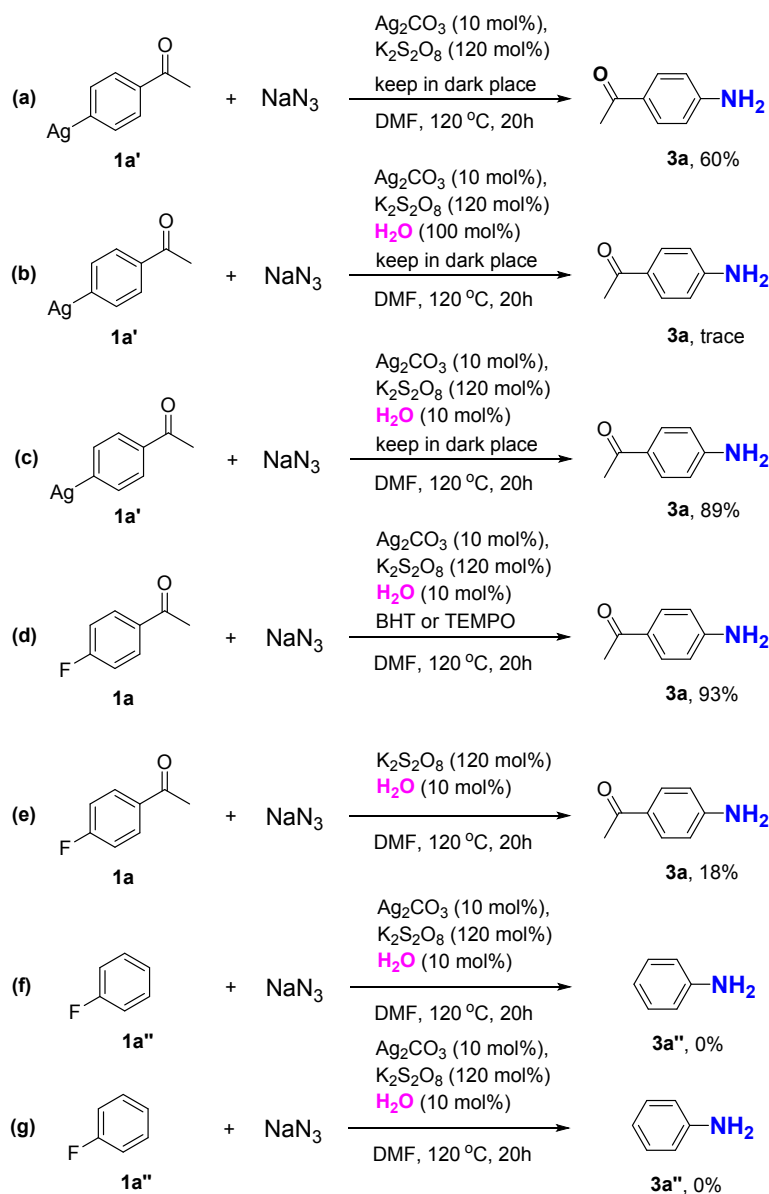

**Scheme S3**

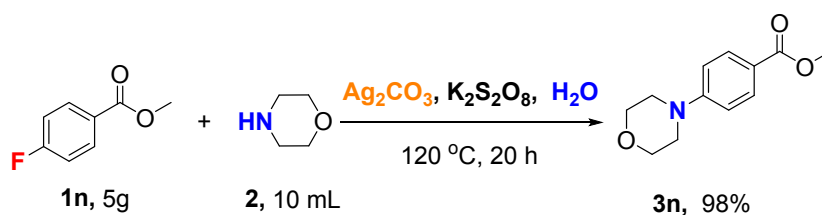

**Scheme S4** Scale-up experiment.

Scale-up experiment: we examined the scalability of our catalytic system (Scheme S4). To demonstrate the utility of our environmentally benign, efficient and simple protocol, a gram scale reaction of **1n** with morpholine in the presence of  $\text{Ag}_2\text{CO}_3$  (10 mol%),  $\text{H}_2\text{O}$  (10 mol%) and  $\text{K}_2\text{S}_2\text{O}_8$  (120 mol%) was carried out. The gram-scale synthesis of the desired product **3n** was achieved successfully in 98% isolated yield.

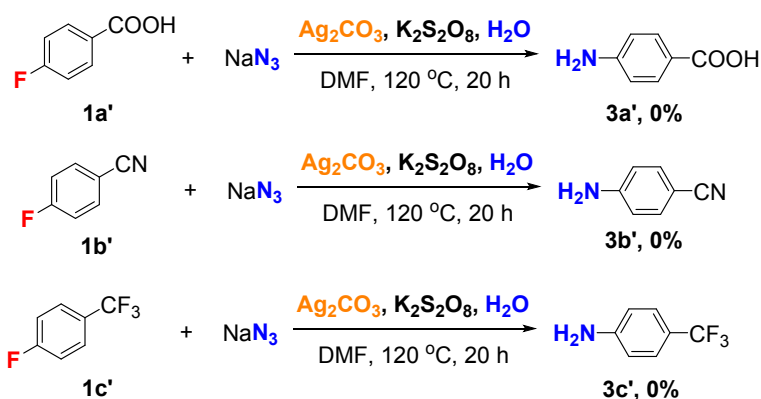

**Scheme S5** Fluoroarenes with other electron withdrawing groups.

## Analytical data

---

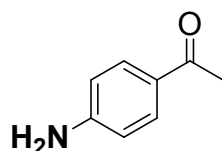

### 1-(4-aminophenyl)ethanone (3a)

White Solid, m.p. 105-106°C; The pure product was obtained by flash column chromatography on silica gel by using petroleum ether (30-60 °C) and ethyl acetate as eluents (petroleum ether /ethyl acetate = 4/1);  $^1\text{H NMR}$  (500 MHz, DMSO)  $\delta$  7.67 (d,  $J$  = 9.0 Hz, 2H), 6.57 (d,  $J$  = 8.5 Hz, 2H), 6.02 (s, 2H), 2.38 (s, 3H);  $^{13}\text{C NMR}$  (125 MHz, DMSO)  $\delta$  194.9, 153.5, 130.5, 124.8, 112.4, 25.8; **HRMS** (ESI) Calcd. for  $\text{C}_8\text{H}_{10}\text{NO}$   $[\text{M}+\text{H}]^+$ , 136.0762. Found:  $m/z$  136.0764. The crude product was purified by flash column chromatography to afford **3a** as a white solid in 96% yield (51.9 mg).

---

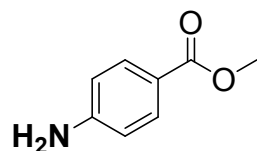

### Methyl 4-aminobenzoate (3b)

White Solid, m.p. 110-111°C; The pure product was obtained by flash column

chromatography on silica gel by using petroleum ether (30-60 °C) and ethyl acetate as eluents (petroleum ether /ethyl acetate = 4/1); **<sup>1</sup>H NMR** (400 MHz, DMSO)  $\delta$  7.59 (d,  $J$  = 8.8 Hz, 2H), 6.52 (d,  $J$  = 8.8 Hz, 2H), 5.90 (s, 2H), 3.67 (s, 3H); **<sup>13</sup>C NMR** (100 MHz, DMSO)  $\delta$  166.3, 153.4, 131.0, 115.7, 112.6, 51.1; **HRMS** (ESI) Calcd. for C<sub>8</sub>H<sub>10</sub>NO<sub>2</sub> [M+H]<sup>+</sup>, 152.0712. Found: m/z 152.0713.

---

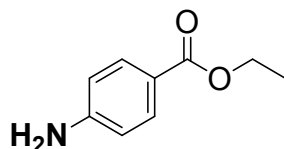

**Ethyl 4-aminobenzoate (3c)**

White Solid, m.p. 92-93°C; The pure product was obtained by flash column chromatography on silica gel by using petroleum ether (30-60 °C) and ethyl acetate as eluents (petroleum ether /ethyl acetate = 4/1); **<sup>1</sup>H NMR** (400 MHz, DMSO)  $\delta$  7.60 (d,  $J$  = 8.8 Hz, 2H), 6.52 (d,  $J$  = 8.8 Hz, 2H), 5.89 (s, 2H), 4.17 (q,  $J$  = 7.2 Hz, 2H), 1.21 (t,  $J$  = 7.2 Hz, 3H); **<sup>13</sup>C NMR** (100 MHz, DMSO)  $\delta$  166.3, 153.9, 131.4, 116.5, 113.1, 59.9, 14.8; **HRMS** (ESI) Calcd. for C<sub>9</sub>H<sub>12</sub>NO<sub>2</sub> [M+H]<sup>+</sup>, 166.0868. Found: m/z 166.0869.

---

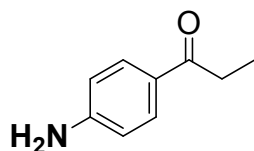

**1-(4-aminophenyl)propan-1-one (3d)**

White Solid, m.p. 136-137°C; The pure product was obtained by flash column chromatography on silica gel by using petroleum ether (30-60 °C) and ethyl acetate as eluents (petroleum ether /ethyl acetate = 4/1); **<sup>1</sup>H NMR** (400 MHz, DMSO)  $\delta$  7.61 (d,  $J$  = 8.8 Hz, 2H), 6.49 (d,  $J$  = 8.8 Hz, 2H), 5.90 (s, 2H), 2.75 (q,  $J$  = 7.2 Hz, 2H), 0.96 (t,  $J$  = 7.2 Hz, 3H); **<sup>13</sup>C NMR** (100 MHz, DMSO)  $\delta$  197.6, 153.4, 130.1, 124.4, 112.5, 30.1, 8.73; **HRMS** (ESI) Calcd. for C<sub>9</sub>H<sub>12</sub>NO [M+H]<sup>+</sup>, 150.0919. Found: m/z 150.0920.

---

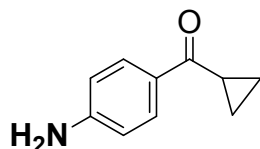

**(4-aminophenyl)(cyclopropyl)methanone (3e)**

White Solid, m.p. 115-116°C; The pure product was obtained by flash column chromatography on silica gel by using petroleum ether (30-60 °C) and ethyl acetate as eluents (petroleum ether /ethyl acetate = 4/1); **<sup>1</sup>H NMR** (400 MHz, DMSO) δ 7.72 (d, *J* = 8.4 Hz, 2H), 6.53 (d, *J* = 8.4 Hz, 2H), 5.95 (s, 2H), 2.70-2.55 (m, 1H), 0.87-0.73 (m, 4H); **<sup>13</sup>C NMR** (100 MHz, DMSO) δ 196.5, 153.5, 130.2, 125.1, 112.5, 15.2, 9.9; **HRMS** (ESI) Calcd. for C<sub>10</sub>H<sub>12</sub>NO [M+H]<sup>+</sup>, 162.0919. Found: m/z 162.0923.

---

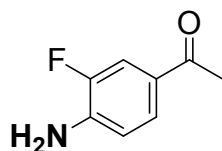

**1-(4-amino-3-fluorophenyl)ethanone (3f)**

White Solid, m.p. 86-87°C; The pure product was obtained by flash column chromatography on silica gel by using petroleum ether (30-60 °C) and ethyl acetate as eluents (petroleum ether /ethyl acetate = 4/1); **<sup>1</sup>H NMR** (400 MHz, DMSO) δ 7.52-7.43 (m, 2H), 6.71 (t, *J* = 9.2 Hz, 1H), 6.04 (s, 2H), 2.35 (s, 3H); **<sup>13</sup>C NMR** (100 MHz, DMSO) δ 194.7, 150.5 (d, *J* = 236.8 Hz), 141.9 (d, *J* = 13.1 Hz), 136.4 (d, *J* = 1.9 Hz), 124.9 (d, *J* = 4.7 Hz), 114.7 (d, *J* = 18.1 Hz), 114.4 (d, *J* = 4.9 Hz), 25.9; **<sup>19</sup>F NMR** (376.5 MHz, CDCl<sub>3</sub>) δ 135.88; **HRMS** (ESI) Calcd. for C<sub>8</sub>H<sub>9</sub>FNO [M+H]<sup>+</sup>, 154.0668. Found: m/z 154.0669.

---

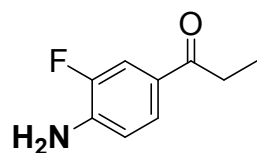

**1-(4-amino-3-fluorophenyl)propan-1-one (3g)**

White Solid, m.p. 92-93°C; The pure product was obtained by flash column chromatography on silica gel by using petroleum ether (30-60 °C) and ethyl acetate as



eluents (petroleum ether /ethyl acetate = 4/1); **<sup>1</sup>H NMR** (400 MHz, DMSO)  $\delta$  7.59-7.43 (m, 2H), 6.72 (t,  $J$  = 9.2 Hz, 1H), 6.00 (s, 2H), 2.81 (q,  $J$  = 7.2 Hz, 2H), 0.98 (t,  $J$  = 7.2 Hz, 3H); **<sup>13</sup>C NMR** (100 MHz, DMSO)  $\delta$  197.8, 151.0 (d,  $J$  = 236.5 Hz), 142.1 (d,  $J$  = 13.2 Hz), 126.4 (d,  $J$  = 2.1 Hz), 125.0 (d,  $J$  = 4.5 Hz), 114.9, 114.8 (d,  $J$  = 14.1 Hz), 30.7, 8.98; **<sup>19</sup>F NMR**(376.5 MHz, CDCl<sub>3</sub>)  $\delta$  135.855; **HRMS** (ESI) Calcd. for C<sub>9</sub>H<sub>11</sub>FNO [M+H]<sup>+</sup>, 168.0825. Found: m/z 168.0827.

---

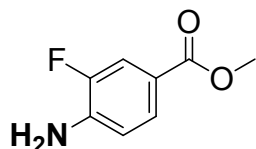

**Methyl 4-amino-3-fluorobenzoate (3h)**

White Solid, m.p. 76-77°C; The pure product was obtained by flash column chromatography on silica gel by using petroleum ether (30-60 °C) and ethyl acetate as eluents (petroleum ether /ethyl acetate = 4/1); **<sup>1</sup>H NMR** (400 MHz, DMSO)  $\delta$  7.53-7.36 (m, 2H), 6.73 (t,  $J$  = 8.4 Hz, 1H), 6.01 (s, 2H), 3.71 (s, 3H); **<sup>13</sup>C NMR** (100 MHz, DMSO)  $\delta$  165.6 (d,  $J$  = 2.8 Hz), 150.3 (d,  $J$  = 236.2 Hz), 141.7 (d,  $J$  = 12.8 Hz), 126.8 (d,  $J$  = 2.1 Hz), 116.0 (d,  $J$  = 6.0 Hz), 115.7 (d,  $J$  = 19.2 Hz), 114.7 (d,  $J$  = 4.9 Hz), 51.5; **<sup>19</sup>F NMR**(376.5 MHz, CDCl<sub>3</sub>)  $\delta$  136.015; **HRMS** (ESI) Calcd. for C<sub>8</sub>H<sub>9</sub>FNO<sub>2</sub> [M+H]<sup>+</sup>, 170.0617. Found: m/z 170.0620.

---

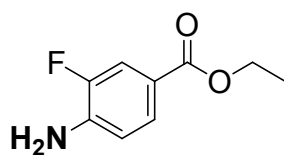

**Ethyl 4-amino-3-fluorobenzoate (3i)**

White Solid, m.p. 68-69°C; The pure product was obtained by flash column chromatography on silica gel by using petroleum ether (30-60 °C) and ethyl acetate as eluents (petroleum ether /ethyl acetate = 4/1); **<sup>1</sup>H NMR** (400 MHz, DMSO)  $\delta$  7.55-7.41 (m, 2H), 6.76 (t,  $J$  = 8.8 Hz, 1H), 6.02 (s, 2H), 4.20 (q,  $J$  = 7.2 Hz, 2H), 1.25 (t,  $J$  = 7.2 Hz, 3H); **<sup>13</sup>C NMR** (100 MHz, DMSO)  $\delta$  165.1 (d,  $J$  = 2.7 Hz), 150.3 (d,  $J$  = 236.1 Hz), 141.7 (d,  $J$  = 12.8 Hz), 126.7 (d,  $J$  = 2.2 Hz), 116.3 (d,  $J$  = 6.0 Hz), 115.6 (d,  $J$  = 19.2 Hz), 114.7 (d,  $J$  = 5.0 Hz), 59.9, 14.2; **<sup>19</sup>F NMR**(376.5 MHz, CDCl<sub>3</sub>)  $\delta$  136.011; **HRMS** (ESI) Calcd. for C<sub>9</sub>H<sub>11</sub>FNO<sub>2</sub> [M+H]<sup>+</sup>,

184.0774. Found: m/z 184.0774.

---

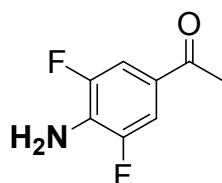

**1-(4-amino-3,5-difluorophenyl)ethanone (3j)**

White Solid, m.p. 85-86°C; The pure product was obtained by flash column chromatography on silica gel by using petroleum ether (30-60 °C) and ethyl acetate as eluents (petroleum ether /ethyl acetate = 4/1); **<sup>1</sup>H NMR** (400 MHz, CDCl<sub>3</sub>) δ 7.52-7.41 (m, 2H), 4.25 (s, 2H), 2.50 (s, 3H); **<sup>13</sup>C NMR** (100 MHz, CDCl<sub>3</sub>) δ 194.8, 151.9 (dd, *J* = 7.7, 240.1 Hz), 129.2 (t, *J* = 16.1 Hz), 125.7 (t, *J* = 6.5 Hz), 111.5 (m), 25.9; **<sup>19</sup>F NMR**(376.5 MHz, CDCl<sub>3</sub>) δ 136.281; **HRMS** (ESI) Calcd. for C<sub>8</sub>H<sub>8</sub>F<sub>2</sub>NO [M+H]<sup>+</sup>, 172.0574 . Found: m/z 172.0575.

---

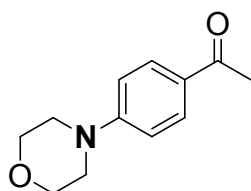

**1-(4-morpholinophenyl)ethan-1-one (3k)**

White solid, m.p. 65-66 °C; The pure product was obtained by flash column chromatography on silica gel by using petroleum ether (30-60 °C) and ethyl acetate as eluents (petroleum ether /ethyl acetate = 3/1); **<sup>1</sup>H NMR** (400 MHz, CDCl<sub>3</sub>) δ 7.90 (d, *J* = 9.2 Hz, 2H), 6.88 (d, *J* = 8.8 Hz, 2H), 3.86 (t, *J* = 4.8 Hz, 4H), 3.30 (t, *J* = 5.2 Hz, 4H), 2.53 (s, 3H); **<sup>13</sup>C NMR** (100 MHz, CDCl<sub>3</sub>) δ 196.5, 154.1, 130.3, 128.1, 113.2, 66.5, 47.4, 26.1; **HRMS** (ESI) Calcd. for C<sub>12</sub>H<sub>16</sub>NO<sub>2</sub> [M+H]<sup>+</sup>, 206.1181. Found: m/z 206.1182.

---

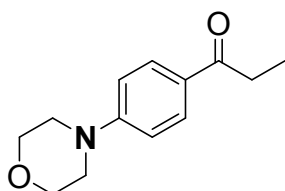

### 1-(4-morpholinophenyl)propan-1-one (3l)

White Solid, m.p. 83-84 °C; The pure product was obtained by flash column chromatography on silica gel by using petroleum ether (30-60 °C) and ethyl acetate as eluents (petroleum ether /ethyl acetate = 3/1); <sup>1</sup>H NMR (400 MHz, CDCl<sub>3</sub>) δ 7.91 (d, *J* = 8.8 Hz, 2H), 6.87 (d, *J* = 9.2 Hz, 2H), 3.85 (t, *J* = 5.2 Hz, 4H), 3.29 (t, *J* = 5.2 Hz, 4H), 2.93 (q, *J* = 7.2, 14.4 Hz, 2H), 1.20 (t, *J* = 7.2 Hz, 3H); <sup>13</sup>C NMR (100 MHz, CDCl<sub>3</sub>) δ 199.2, 154.1, 129.9, 127.8, 113.3, 66.5, 47.5, 31.2, 8.6; HRMS (ESI) Calcd. for C<sub>13</sub>H<sub>18</sub>NO<sub>2</sub> [M+H]<sup>+</sup>, 220.1338. Found: m/z 220.1339.

---

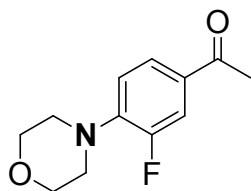

### 1-(3-fluoro-4-morpholinophenyl)ethan-1-one (3m)

White Solid, m.p. 92-93 °C; The pure product was obtained by flash column chromatography on silica gel by using petroleum ether (30-60 °C) and ethyl acetate as eluents (petroleum ether /ethyl acetate = 3/1); <sup>1</sup>H NMR (400 MHz, CDCl<sub>3</sub>) δ 7.71-7.60 (m, 2H), 6.92 (t, *J* = 8.4 Hz, 1H), 3.87 (t, *J* = 4.4 Hz, 4H), 3.21 (t, *J* = 4.8 Hz, 4H), 2.54 (s, 3H); <sup>13</sup>C NMR (100 MHz, CDCl<sub>3</sub>) δ 195.8 (d, *J* = 6.8 Hz), 155.6, 153.2, 144.0 (d, *J* = 32.4 Hz), 131.0 (d, *J* = 24.4 Hz), 125.5 (d, *J* = 11.6 Hz), 117.3 (d, *J* = 13.2 Hz), 116.1 (d, *J* = 87.2 Hz), 66.7, 50.0 (d, *J* = 18.0 Hz), 26.2; <sup>19</sup>F NMR (376.5 MHz, CDCl<sub>3</sub>) δ 131.386; HRMS (ESI) Calcd. for C<sub>12</sub>H<sub>15</sub>FNO<sub>2</sub> [M+H]<sup>+</sup>, 224.1087. Found: m/z 224.1088.

---

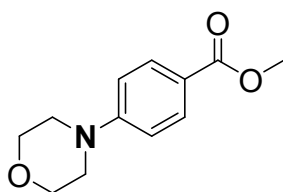

### methyl 4-morpholinobenzoate (3n)

White Solid, m.p. 154-155°C; The pure product was obtained by flash column chromatography on silica gel by using petroleum ether (30-60 °C) and ethyl acetate as

eluents (petroleum ether /ethyl acetate = 3/1); **<sup>1</sup>H NMR** (400 MHz, CDCl<sub>3</sub>) δ 7.96-7.90 (m, 2H), 6.88-6.84 (m, 2H), 3.89-3.83 (m, 7H), 3.28 (t, *J* = 4.8 Hz, 4H); **<sup>13</sup>C NMR** (100 MHz, CDCl<sub>3</sub>) δ 167.0, 154.1, 131.2, 120.3, 113.4, 66.5, 51.6, 47.7; **HRMS** (ESI) Calcd. for C<sub>12</sub>H<sub>16</sub>NO<sub>3</sub> [M+H]<sup>+</sup>, 222.1130. Found: m/z 222.1133.

---

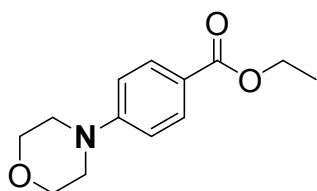

**ethyl 4-morpholinobenzoate(3o)**

White Solid, m.p. 83-84 °C; The pure product was obtained by flash column chromatography on silica gel by using petroleum ether (30-60 °C) and ethyl acetate as eluents (petroleum ether /ethyl acetate = 3/1); **<sup>1</sup>H NMR** (400 MHz, CDCl<sub>3</sub>) δ 7.95 (d, *J* = 8.8 Hz, 2H), 6.86 (d, *J* = 8.8 Hz, 2H), 4.33 (q, *J* = 7.2, 14.4 Hz, 2H), 3.84 (t, *J* = 5.2 Hz, 4H), 3.26 (t, *J* = 4.8 Hz, 4H), 1.38 (t, *J* = 7.2 Hz, 3H); **<sup>13</sup>C NMR** (100 MHz, CDCl<sub>3</sub>) δ 166.4, 154.0, 131.0, 120.5, 113.3, 66.4, 60.2, 47.5, 14.3; **HRMS** (ESI) Calcd. for C<sub>13</sub>H<sub>18</sub>NO<sub>3</sub> [M+H]<sup>+</sup>, 236.1287. Found: m/z 236.1289.

---

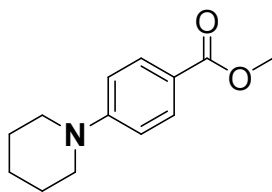

**methyl 4-(piperidin-1-yl)benzoate (3p)**

White Solid, m.p. 94-95 °C; The pure product was obtained by flash column chromatography on silica gel by using petroleum ether (30-60 °C) and ethyl acetate as eluents (petroleum ether /ethyl acetate = 3/1); **<sup>1</sup>H NMR** (400 MHz, CDCl<sub>3</sub>) δ 7.89 (d, *J* = 8.8 Hz, 2H), 6.82 (d, *J* = 8.8 Hz, 2H), 3.83 (s, 3H), 3.34-3.22 (m, 4H), 1.69-1.55 (m, 6H); **<sup>13</sup>C NMR** (100 MHz, CDCl<sub>3</sub>) δ 166.9, 154.2, 131.0, 118.3, 113.3, 51.3, 48.5, 25.1, 24.1; **HRMS** (ESI) Calcd. for C<sub>13</sub>H<sub>18</sub>NO<sub>2</sub> [M+H]<sup>+</sup>, 220.1338. Found: m/z 220.1339.

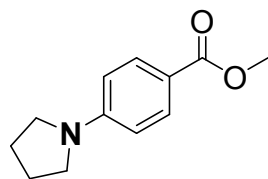

**methyl 4-(pyrrolidin-1-yl)benzoate (3q)**

White Solid, m.p. 67-68 °C; The pure product was obtained by flash column chromatography on silica gel by using petroleum ether (30-60 °C) and ethyl acetate as eluents (petroleum ether /ethyl acetate = 3/1); <sup>1</sup>H NMR (400 MHz, CDCl<sub>3</sub>) δ 7.89 (d, *J* = 8.8 Hz, 2H), 6.49 (d, *J* = 8.8 Hz, 2H), 3.84 (s, 3H), 3.32 (t, *J* = 6.8 Hz, 4H), 2.05-1.95 (m, 4H); <sup>13</sup>C NMR (100 MHz, CDCl<sub>3</sub>) δ 167.5, 150.7, 131.2, 116.0, 110.5, 51.3, 47.3, 25.3; HRMS (ESI) Calcd. for C<sub>12</sub>H<sub>16</sub>NO<sub>2</sub> [M+H]<sup>+</sup>, 206.1181. Found: m/z 206.1182.

---

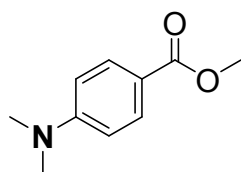

**methyl 4-(dimethylamino)benzoate (3r)**

White Solid, m.p. 237-238 °C; The pure product was obtained by flash column chromatography on silica gel by using petroleum ether (30-60 °C) and ethyl acetate as eluents (petroleum ether /ethyl acetate = 4/1); <sup>1</sup>H NMR (400 MHz, CDCl<sub>3</sub>) δ 7.91 (d, *J* = 8.8 Hz, 2H), 6.65 (d, *J* = 8.8 Hz, 2H), 3.85 (s, 3H), 3.03 (s, 6H); <sup>13</sup>C NMR (100 MHz, CDCl<sub>3</sub>) δ 167.4, 153.2, 131.2, 116.8, 110.6, 51.4, 40.0; HRMS (ESI) Calcd. for C<sub>10</sub>H<sub>14</sub>NO<sub>2</sub> [M+H]<sup>+</sup>, 180.1025. Found: m/z 180.1027.

---

### 3. References

1. M. J. Rozema, A. Sidduri, and P. Knochel, *J. Org. Chem.*, 1992, **57**, 1956-1958.

2. J. Boersma, F. J. A. Des Tombe, F. Weijers and G. J. M. V. Der Kerk, *J. Organomet. Chem.*, 1977, **124**, 229-233.

## 4. NMRspectra copies

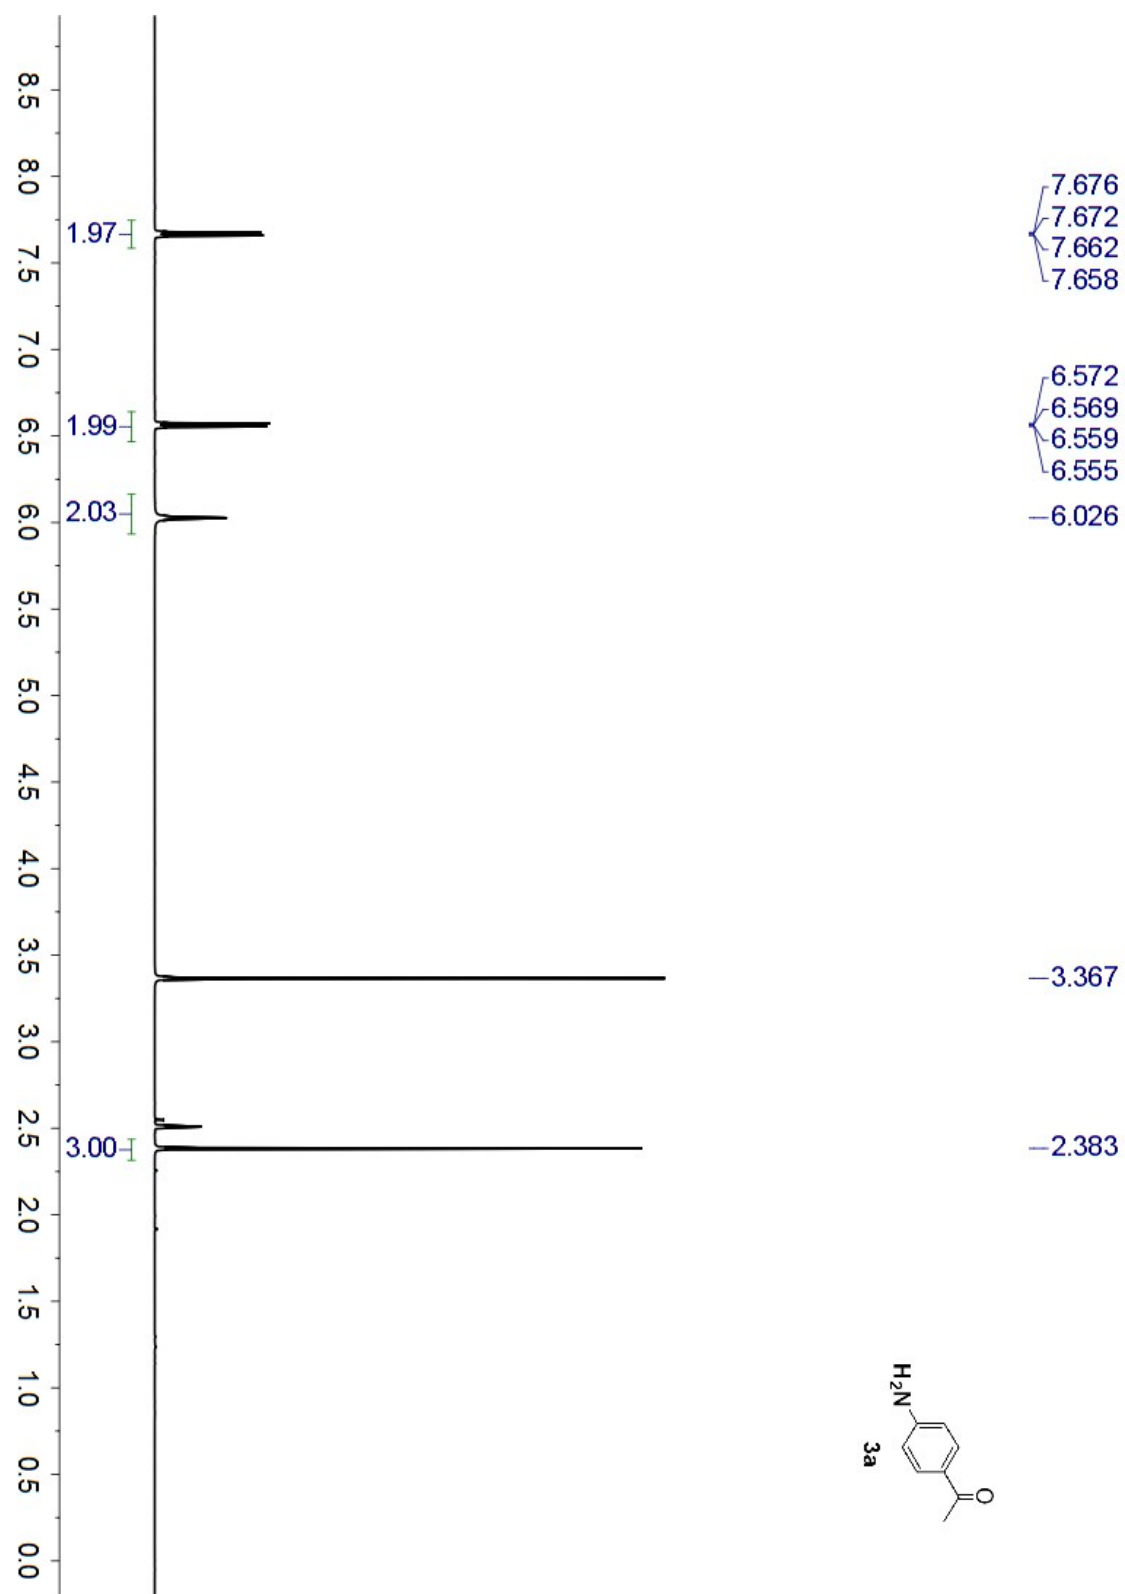

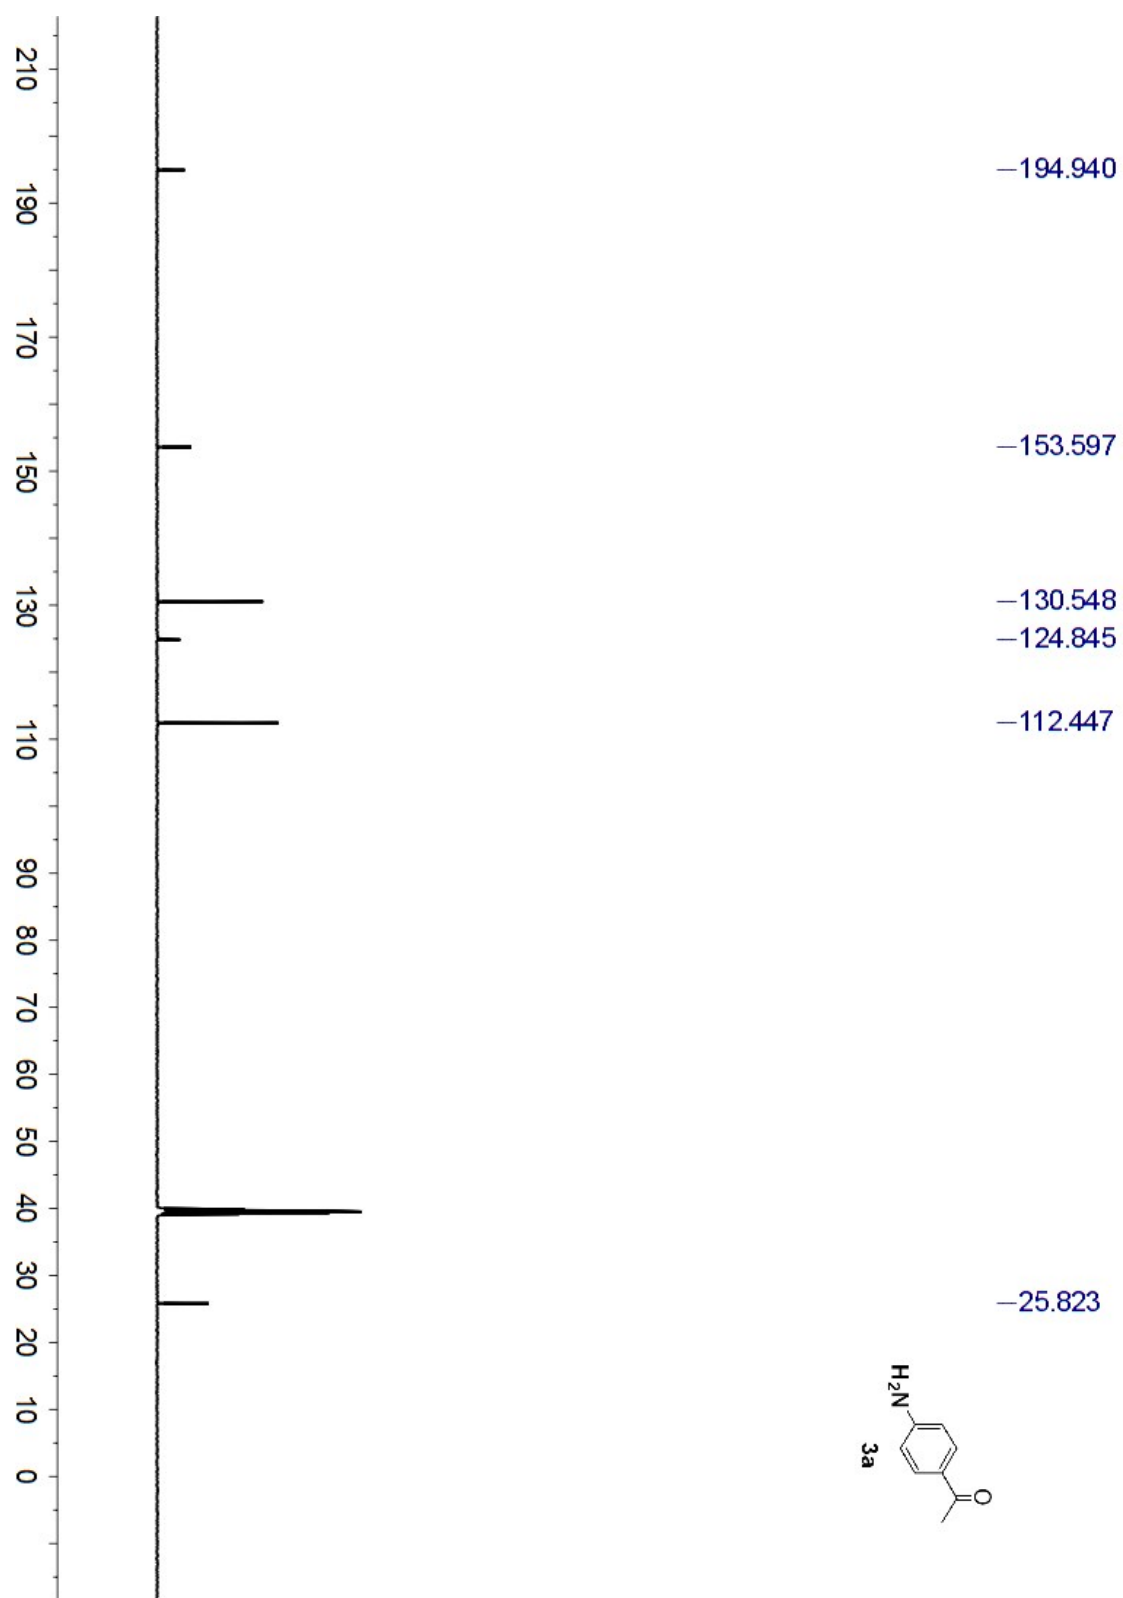



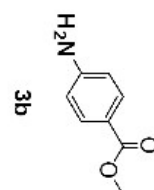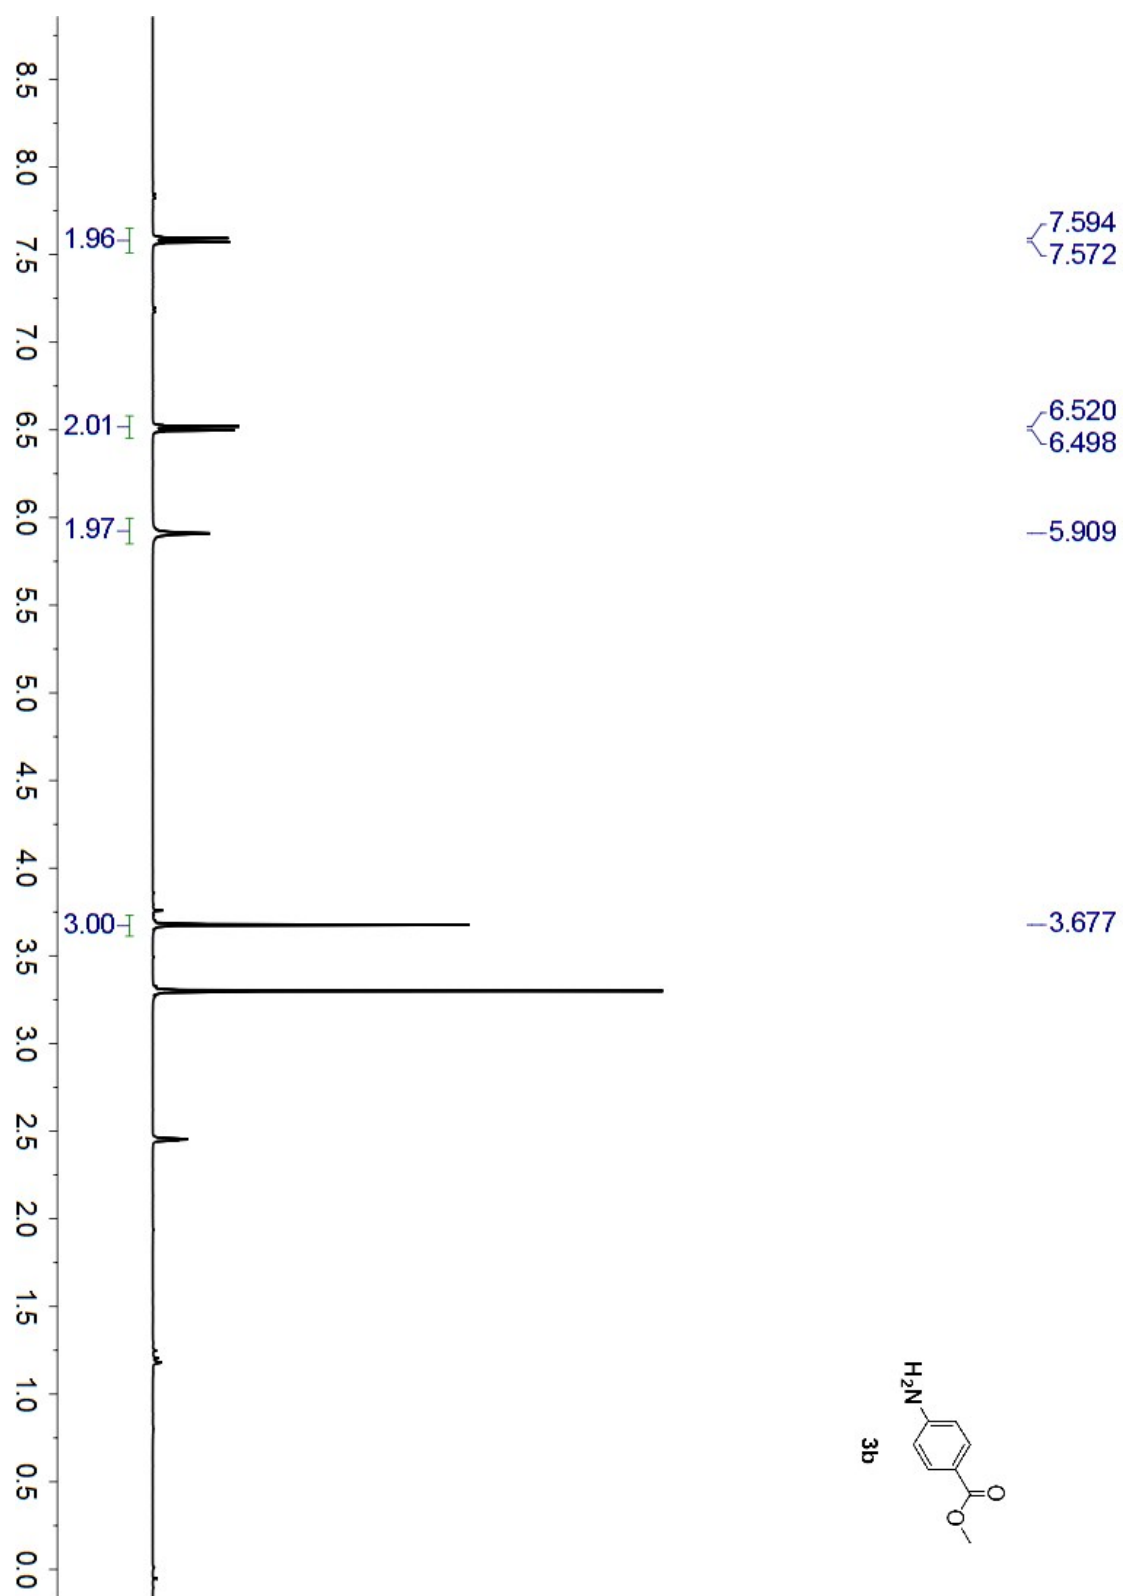

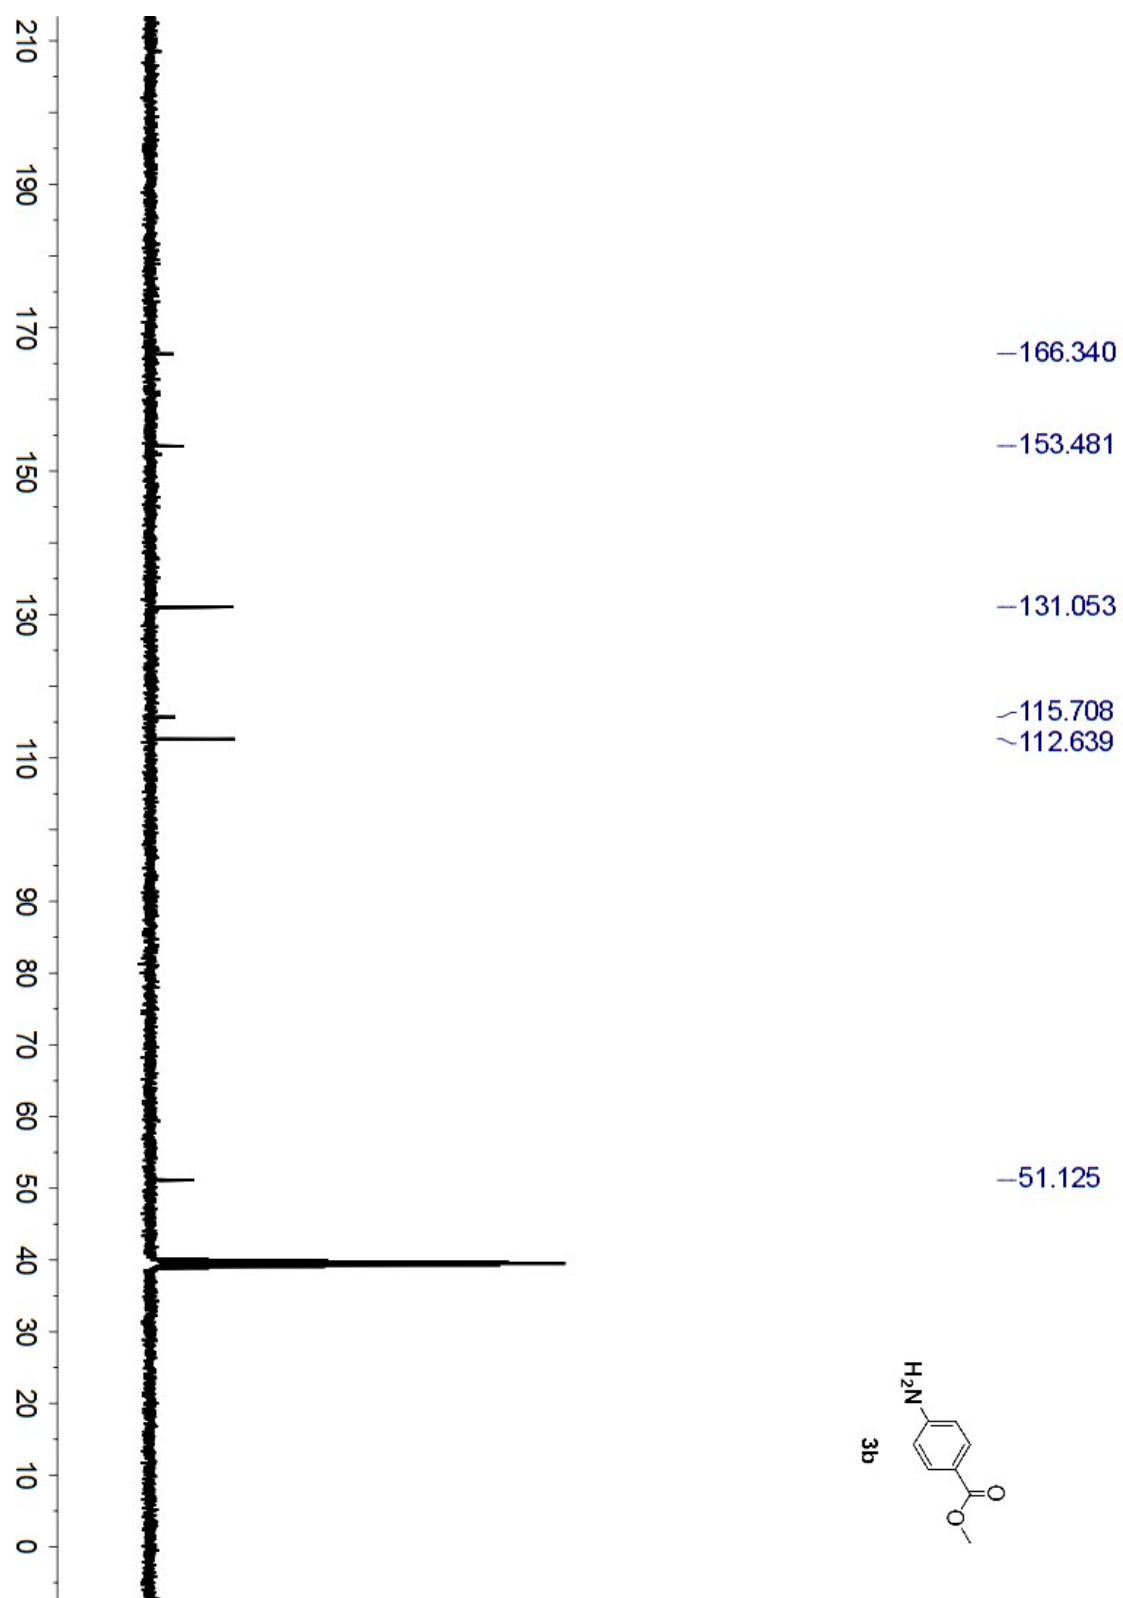

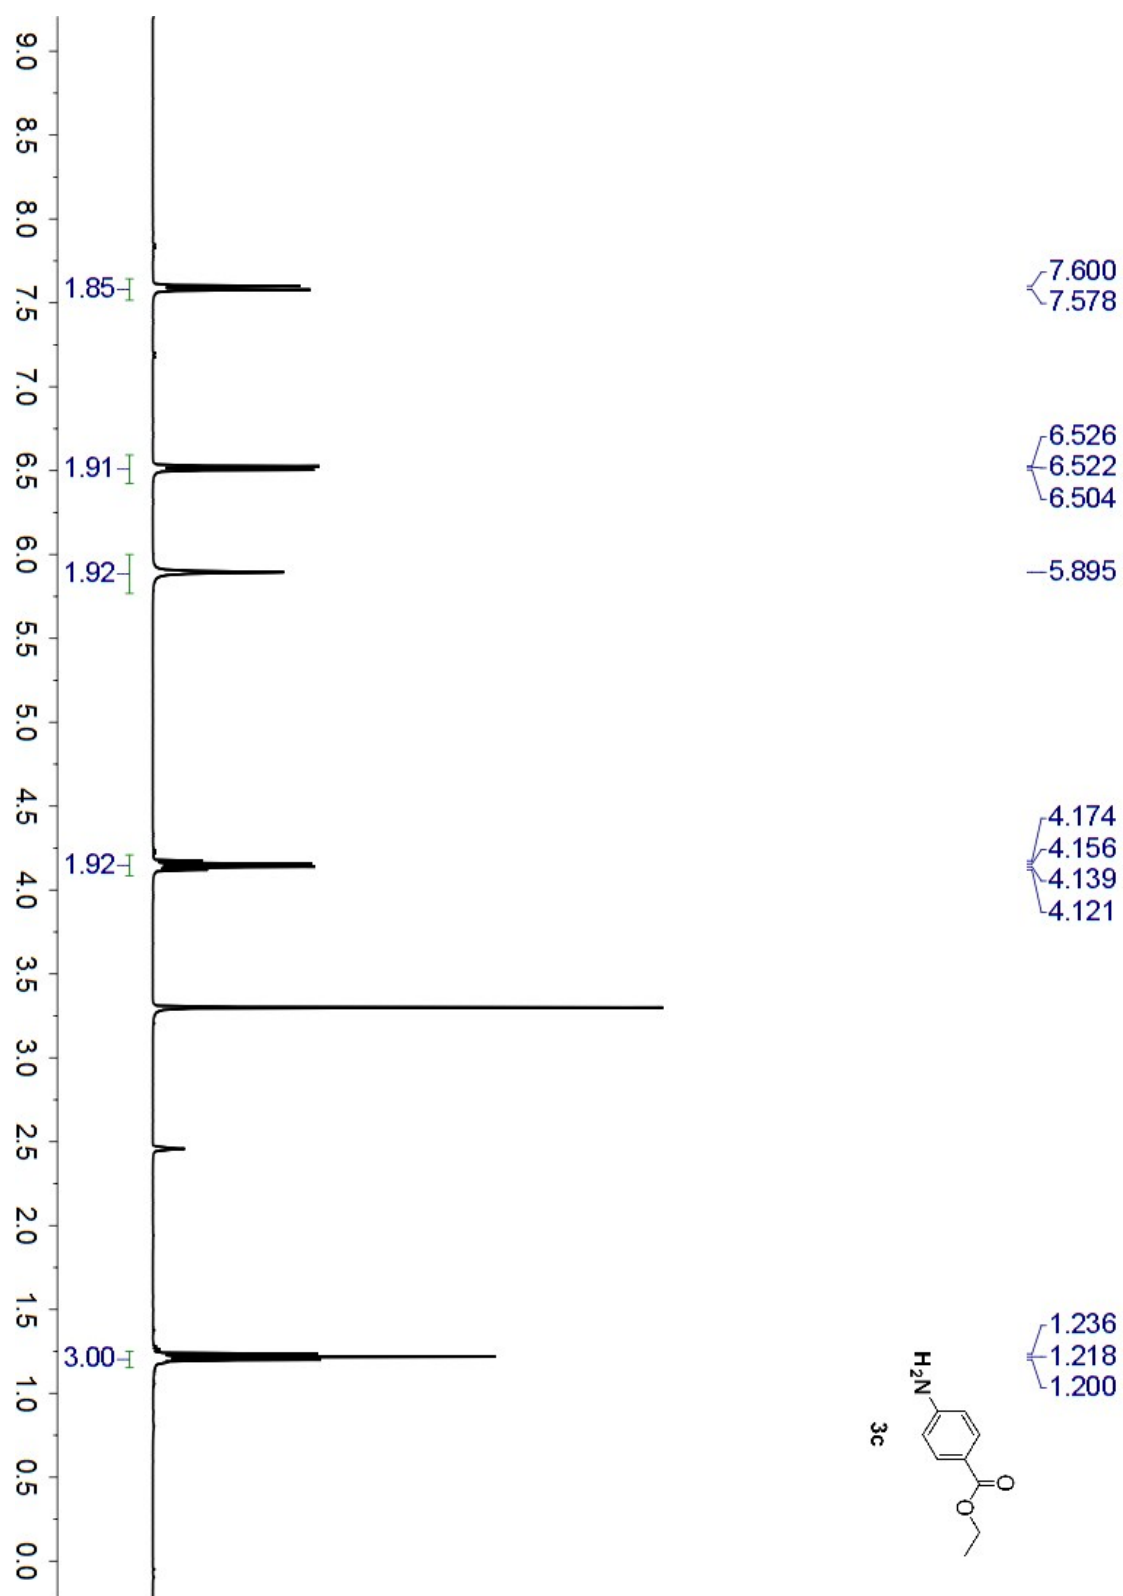

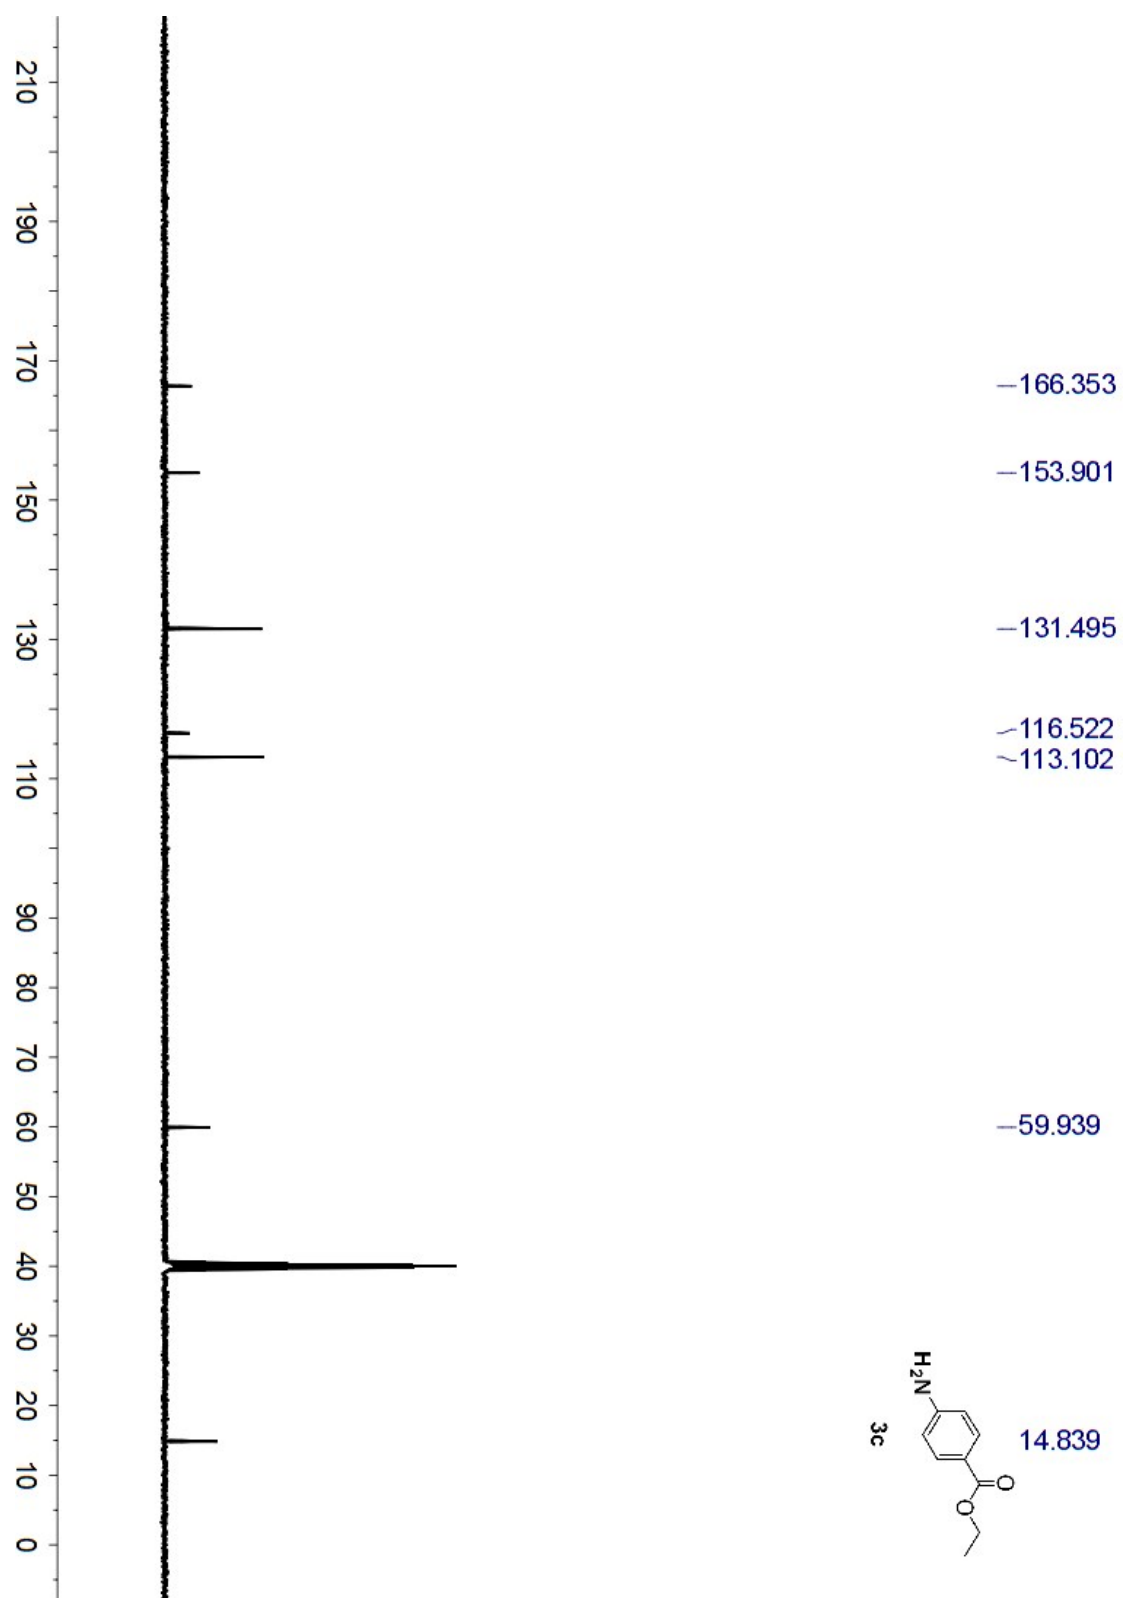

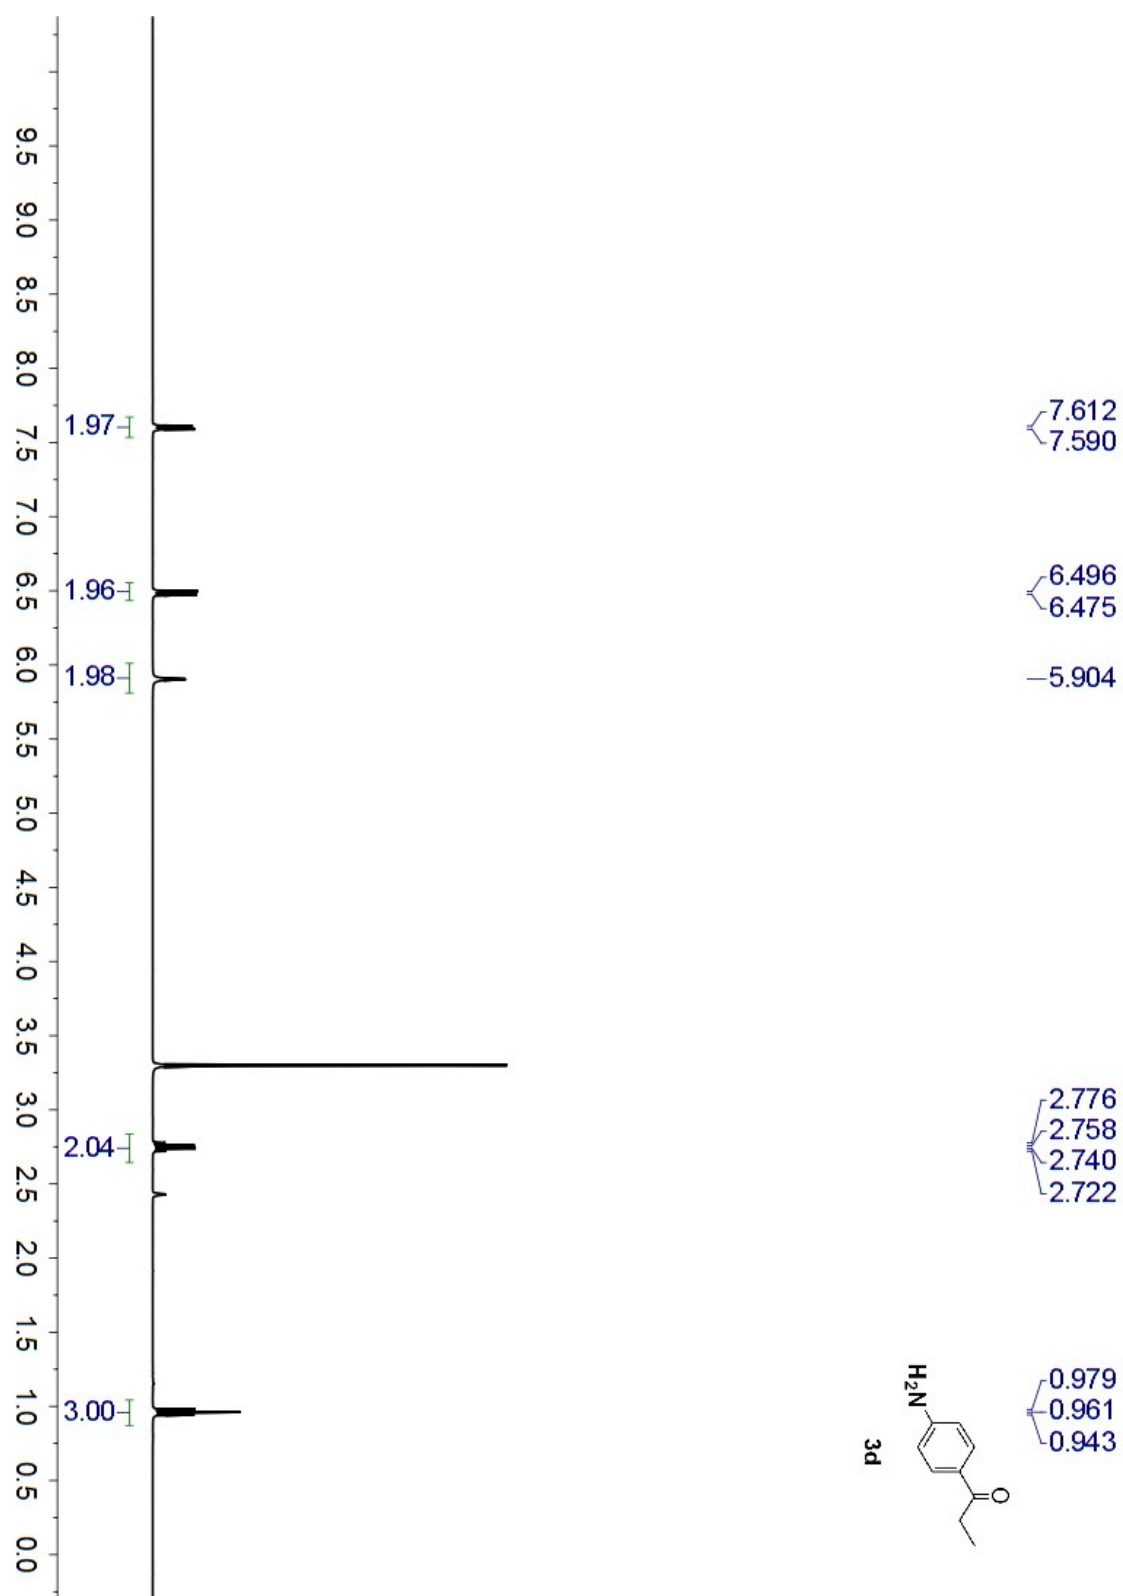

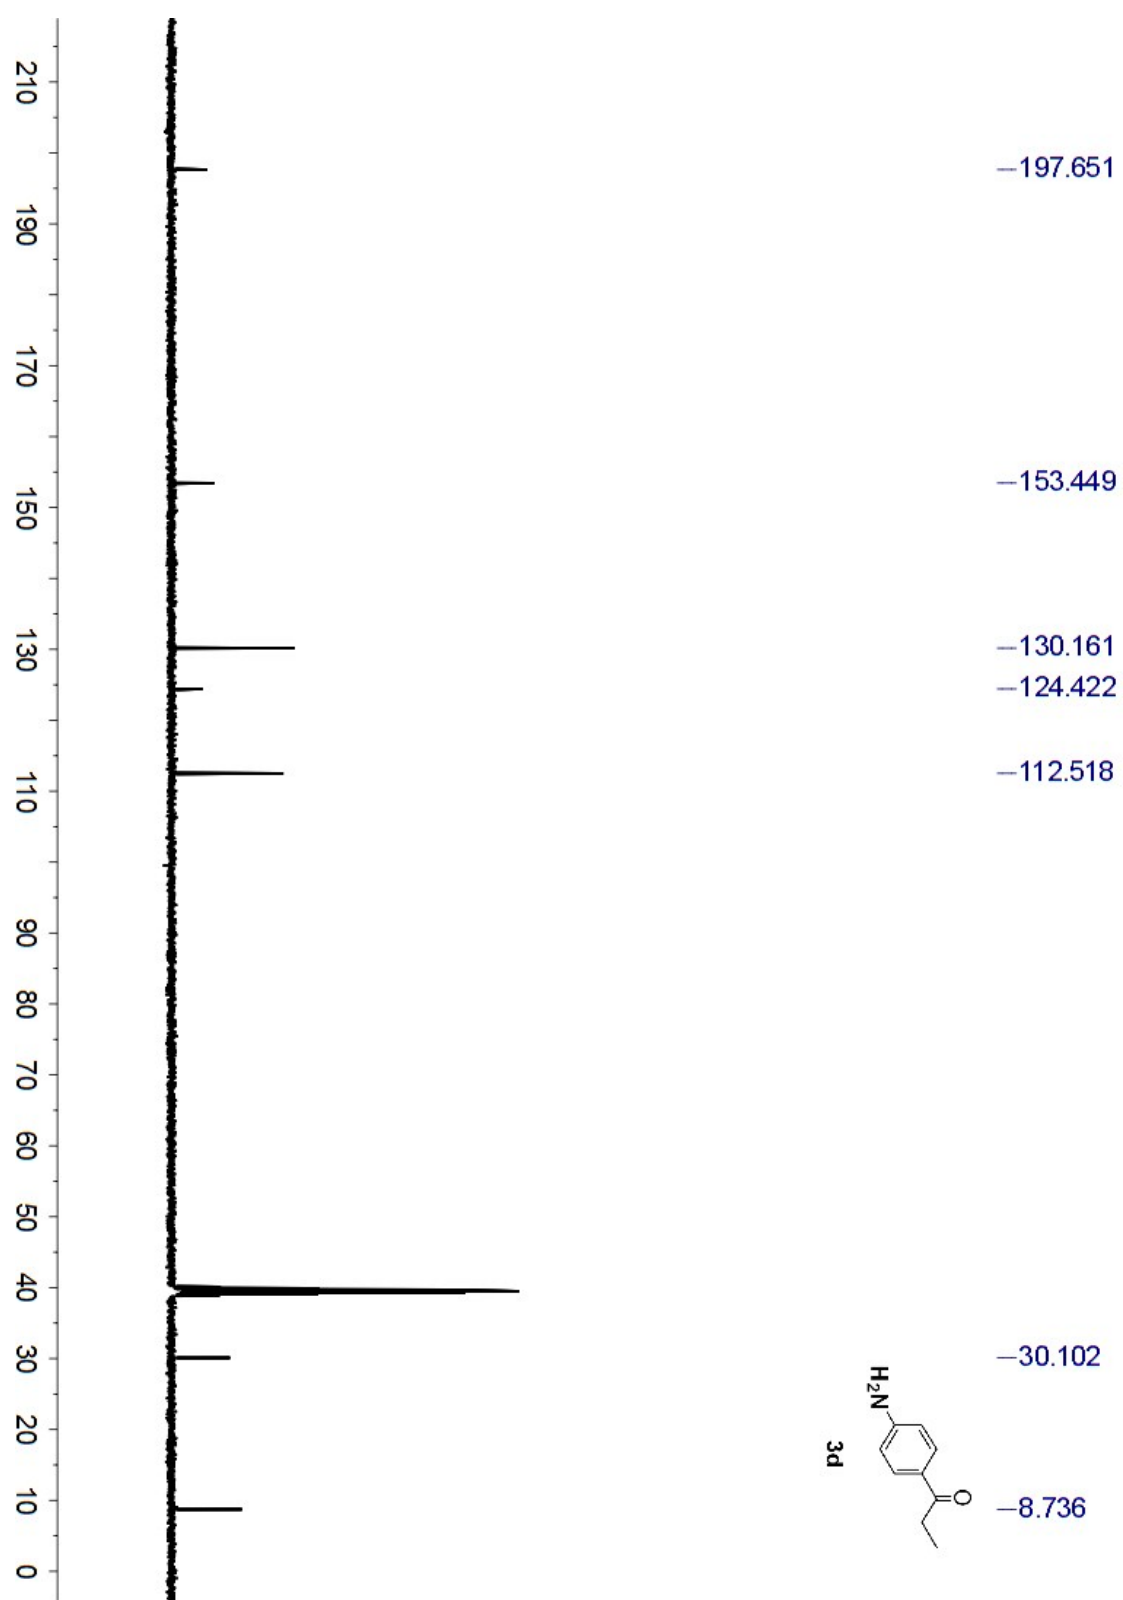

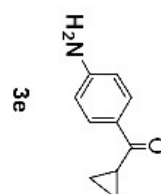

0.842  
0.831  
0.822  
0.802

2.646  
2.635  
2.626  
2.618

—5.957

6.539  
6.518

7.725  
7.704

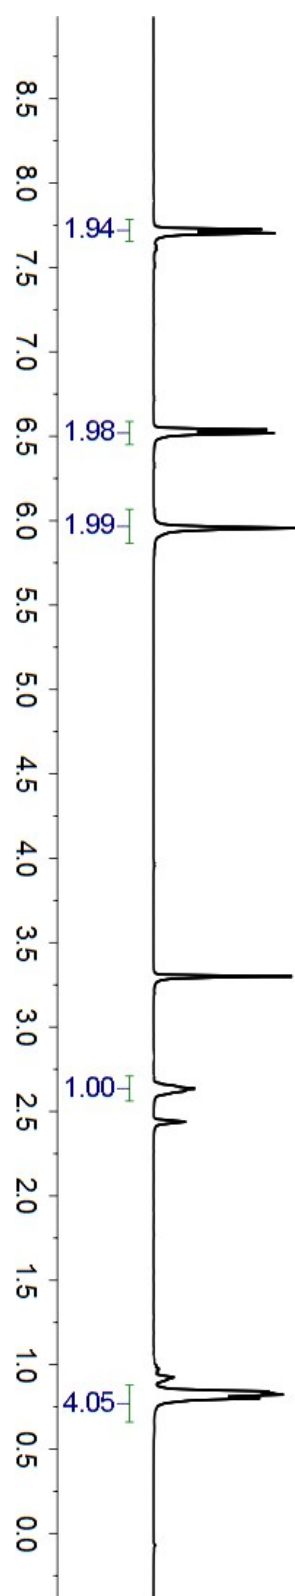

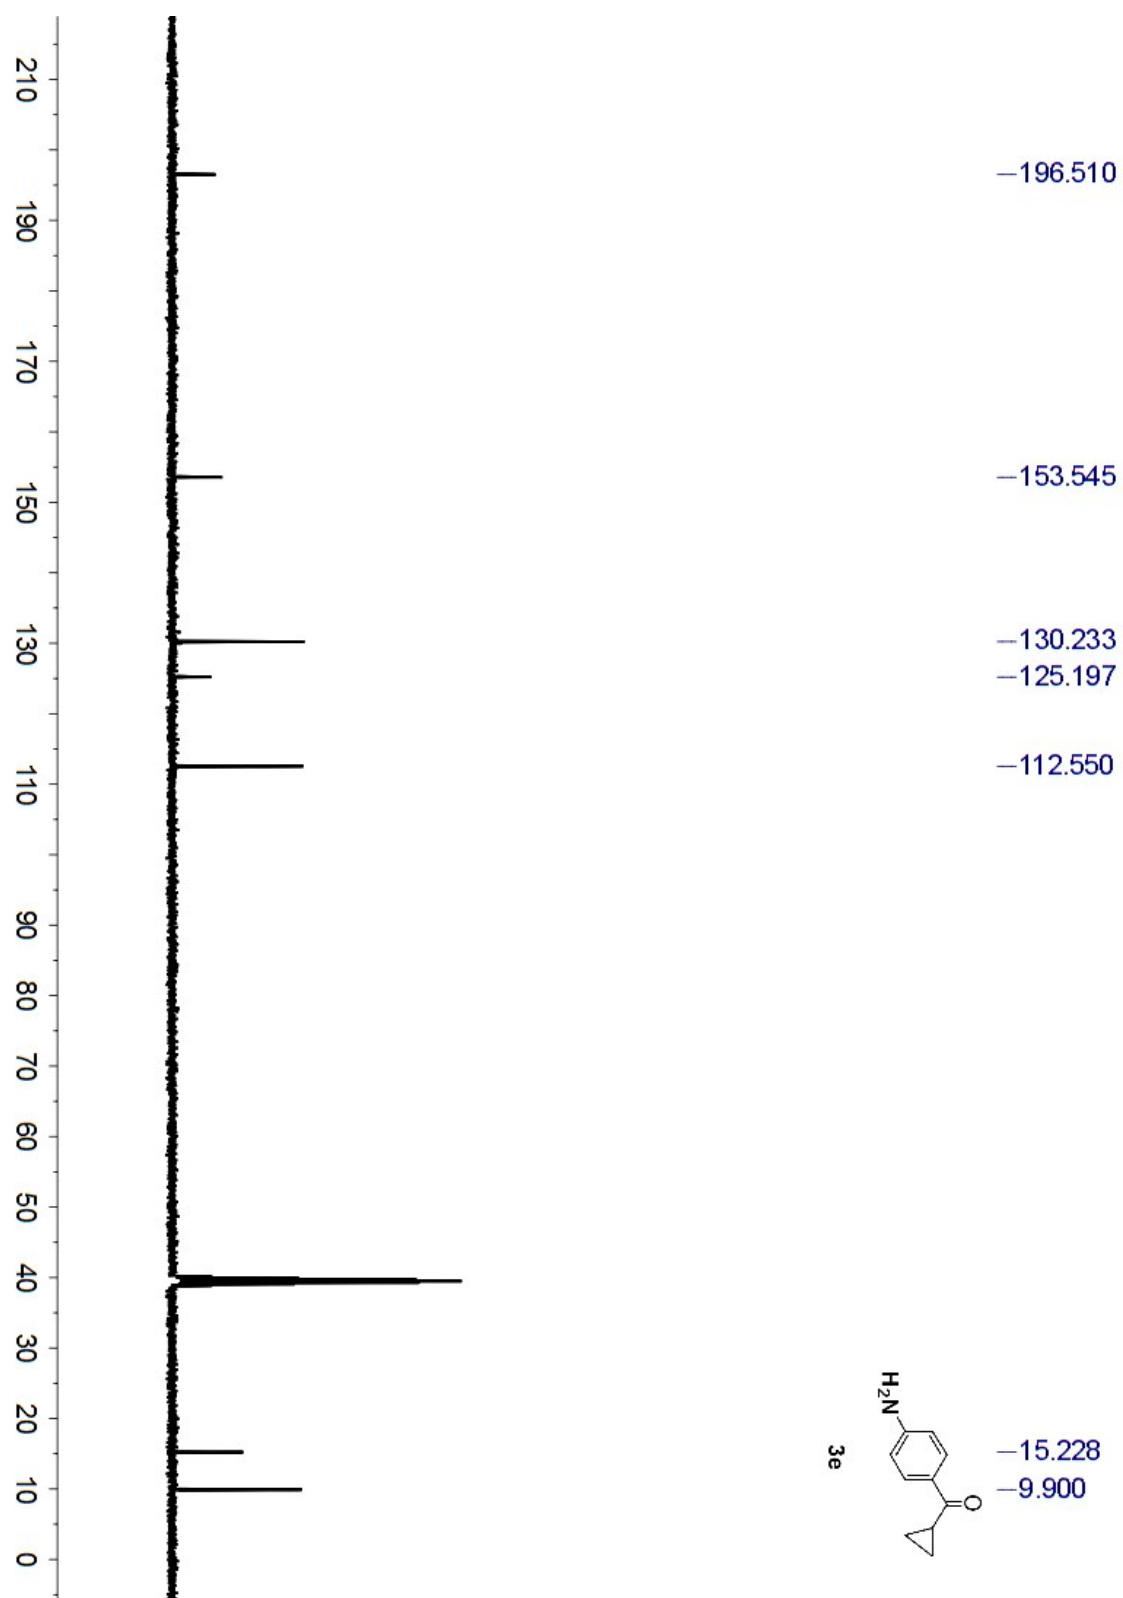



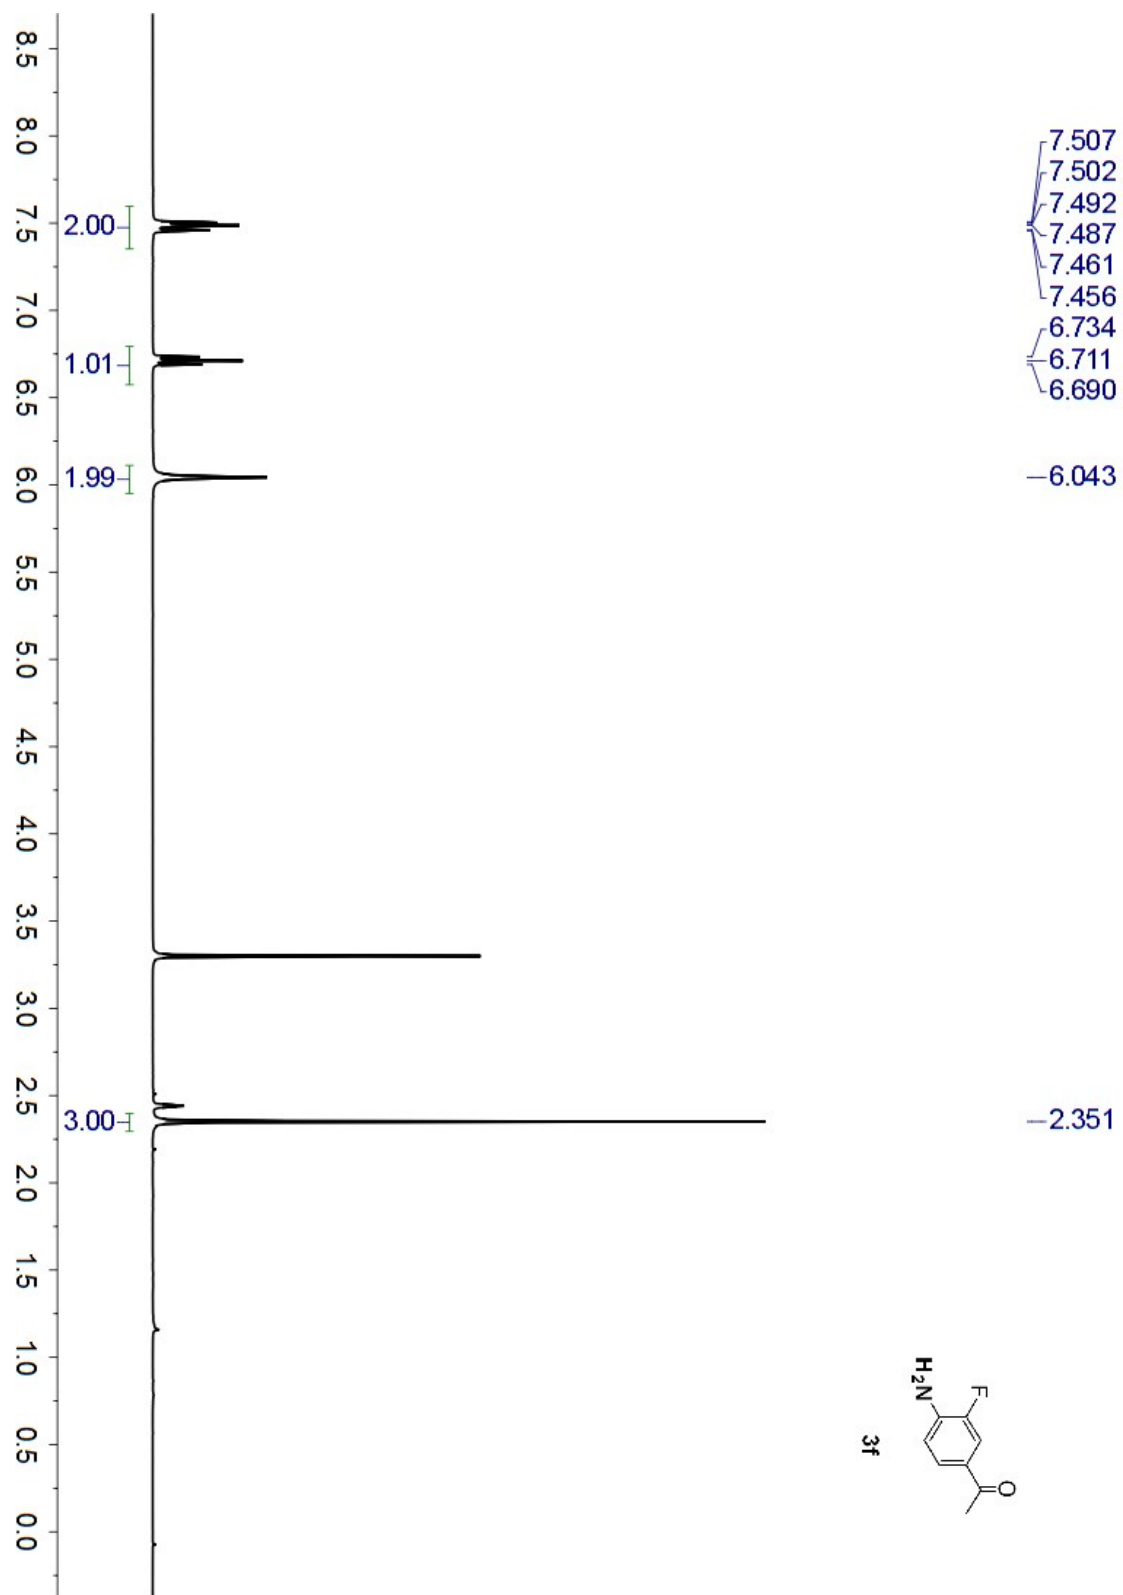

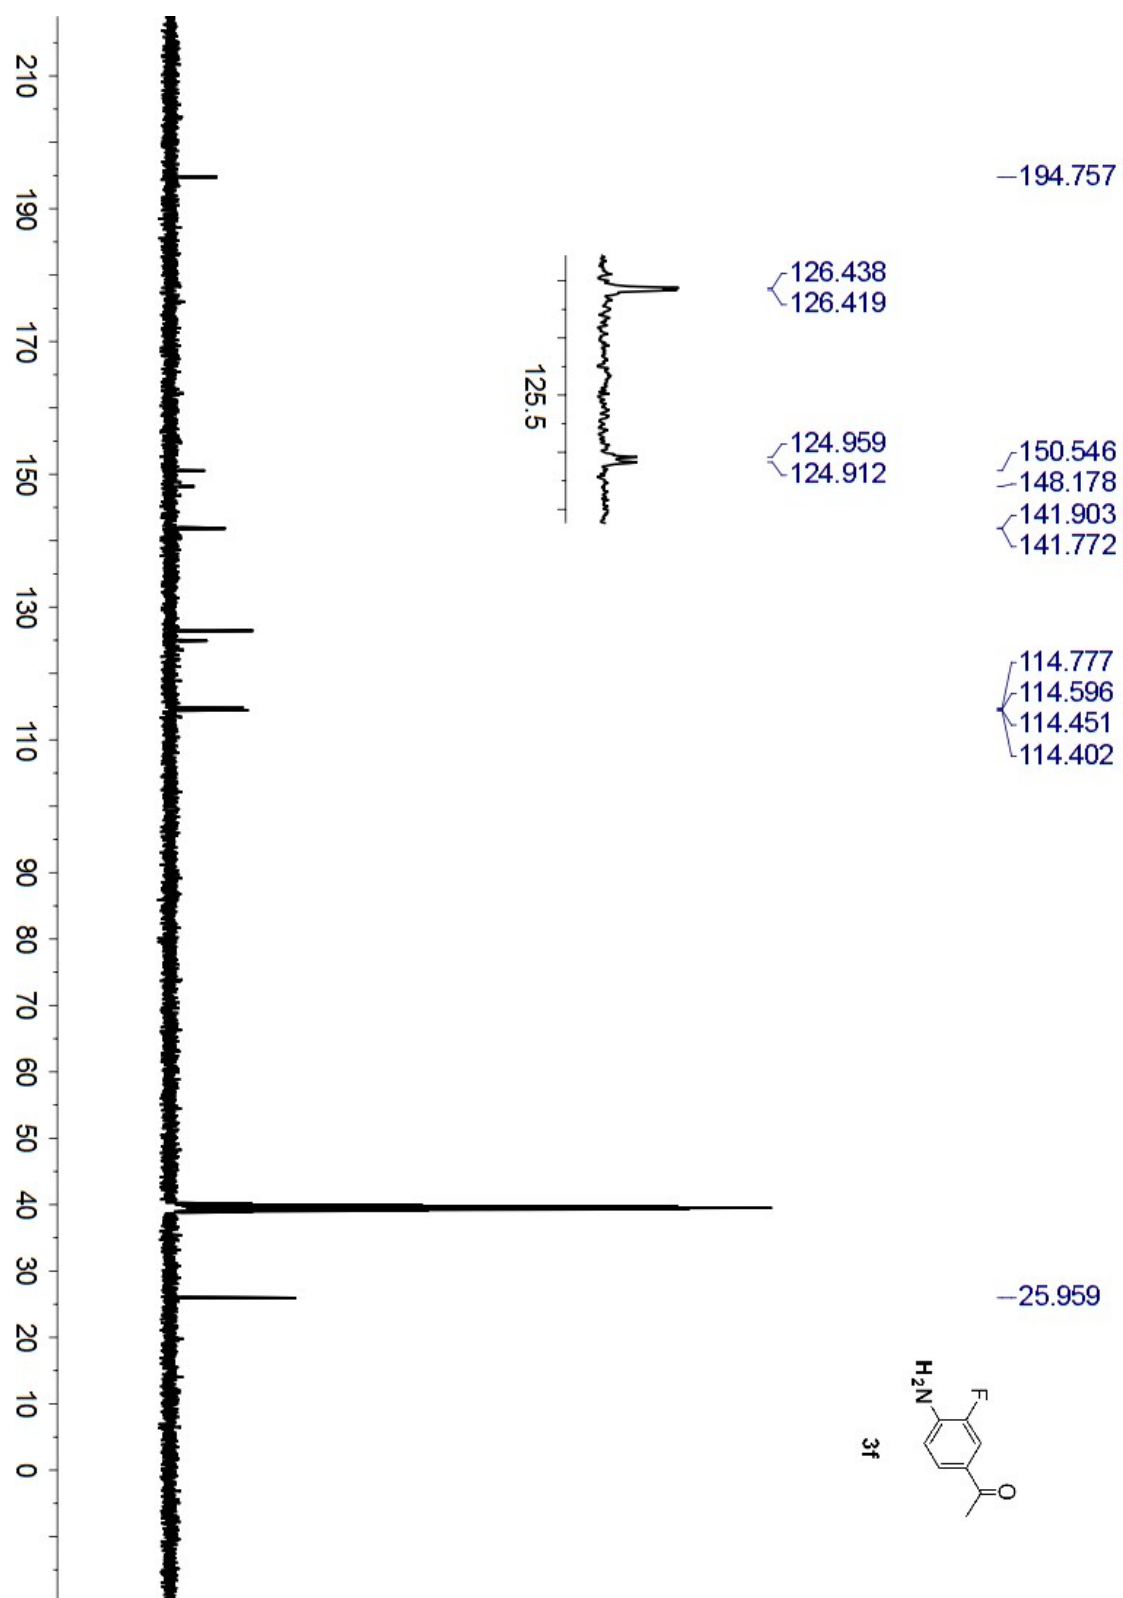

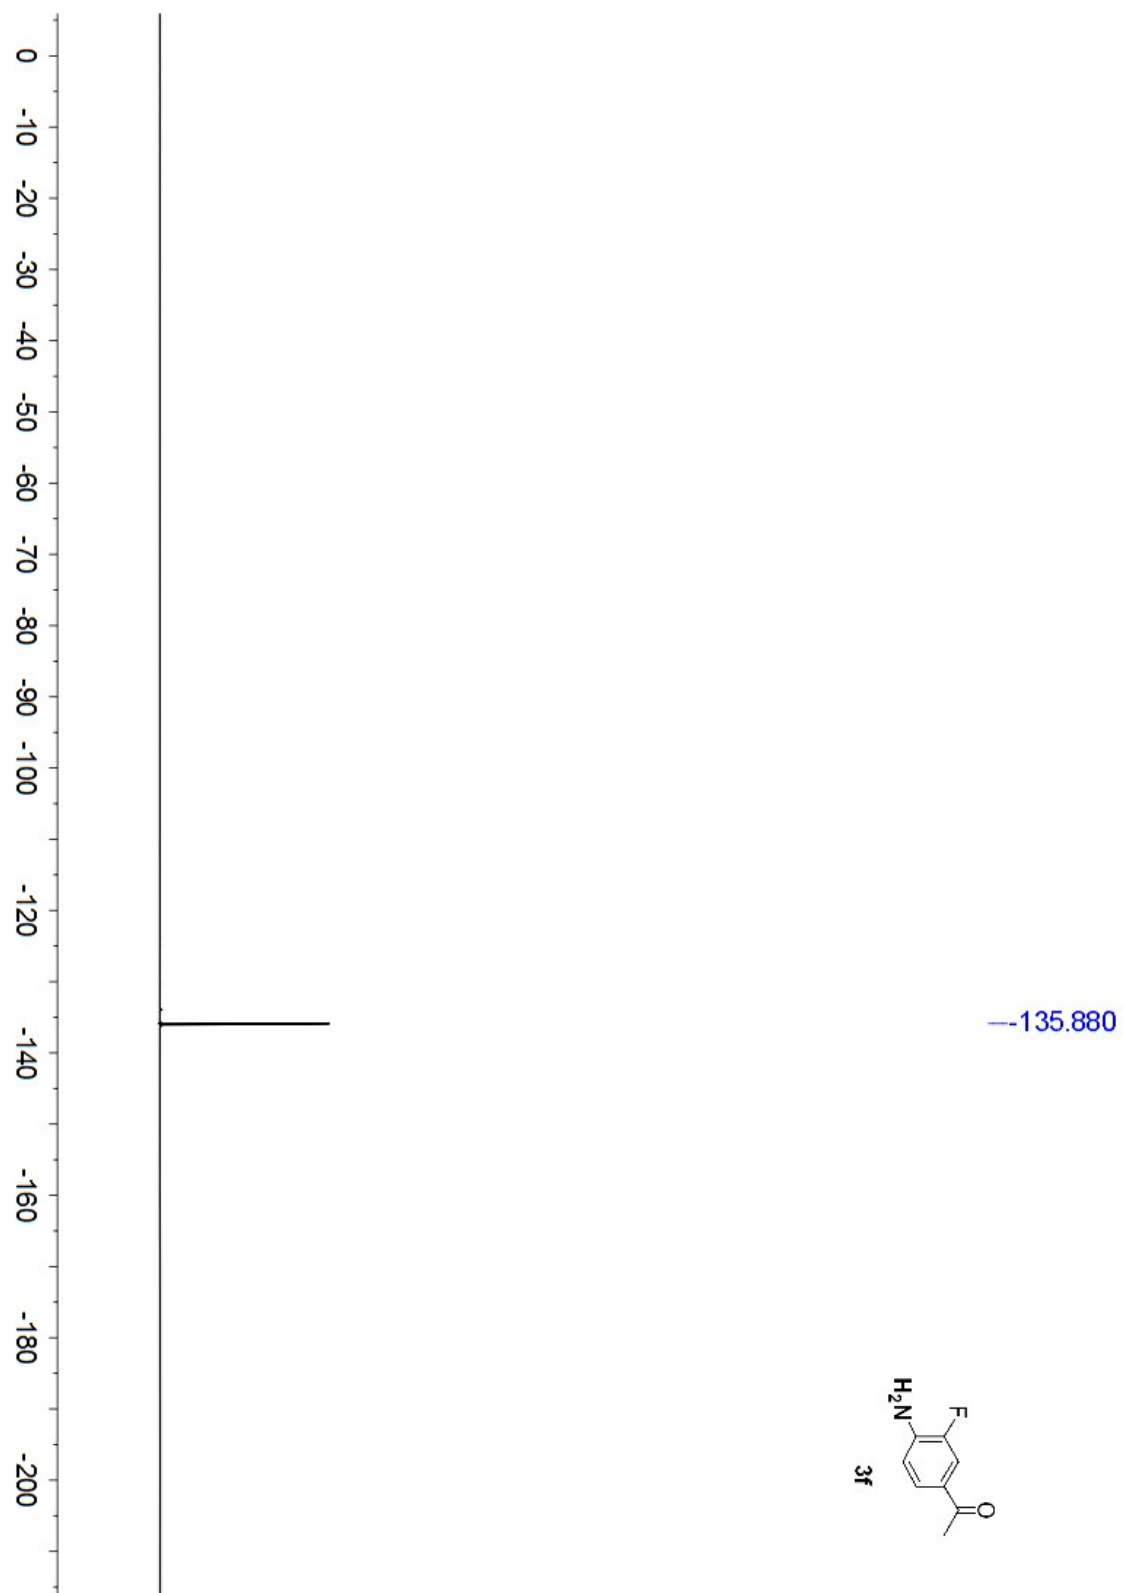

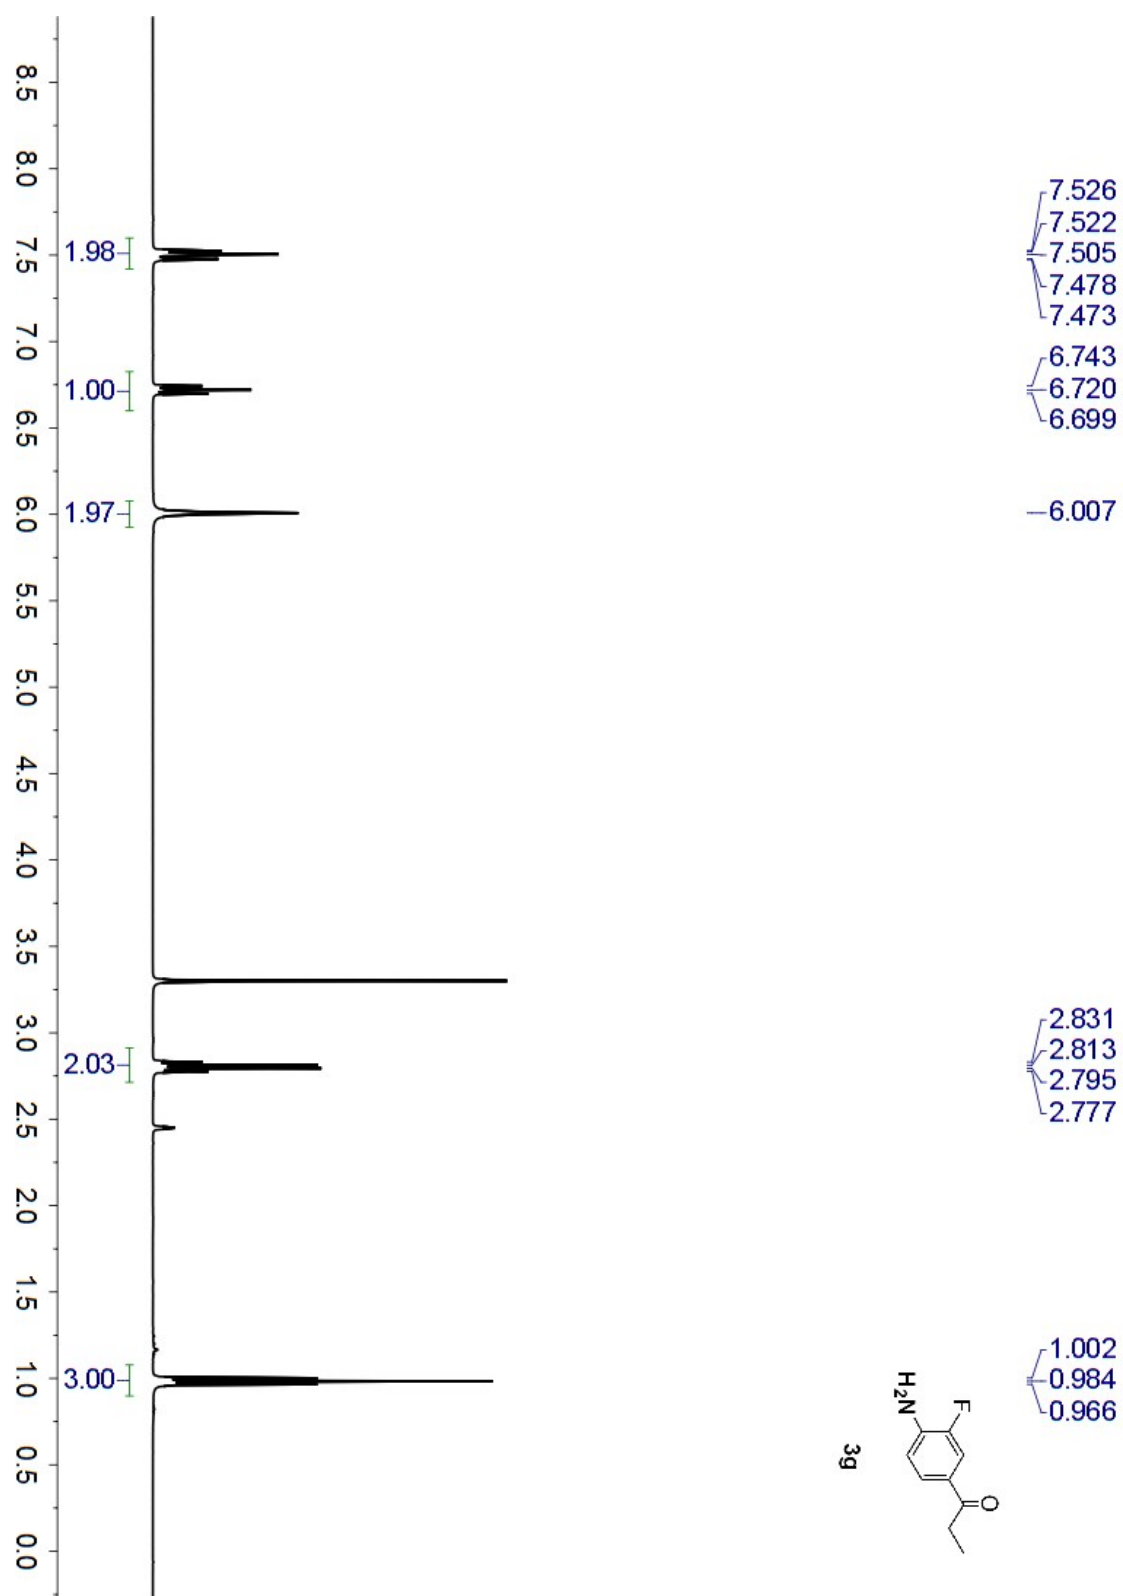

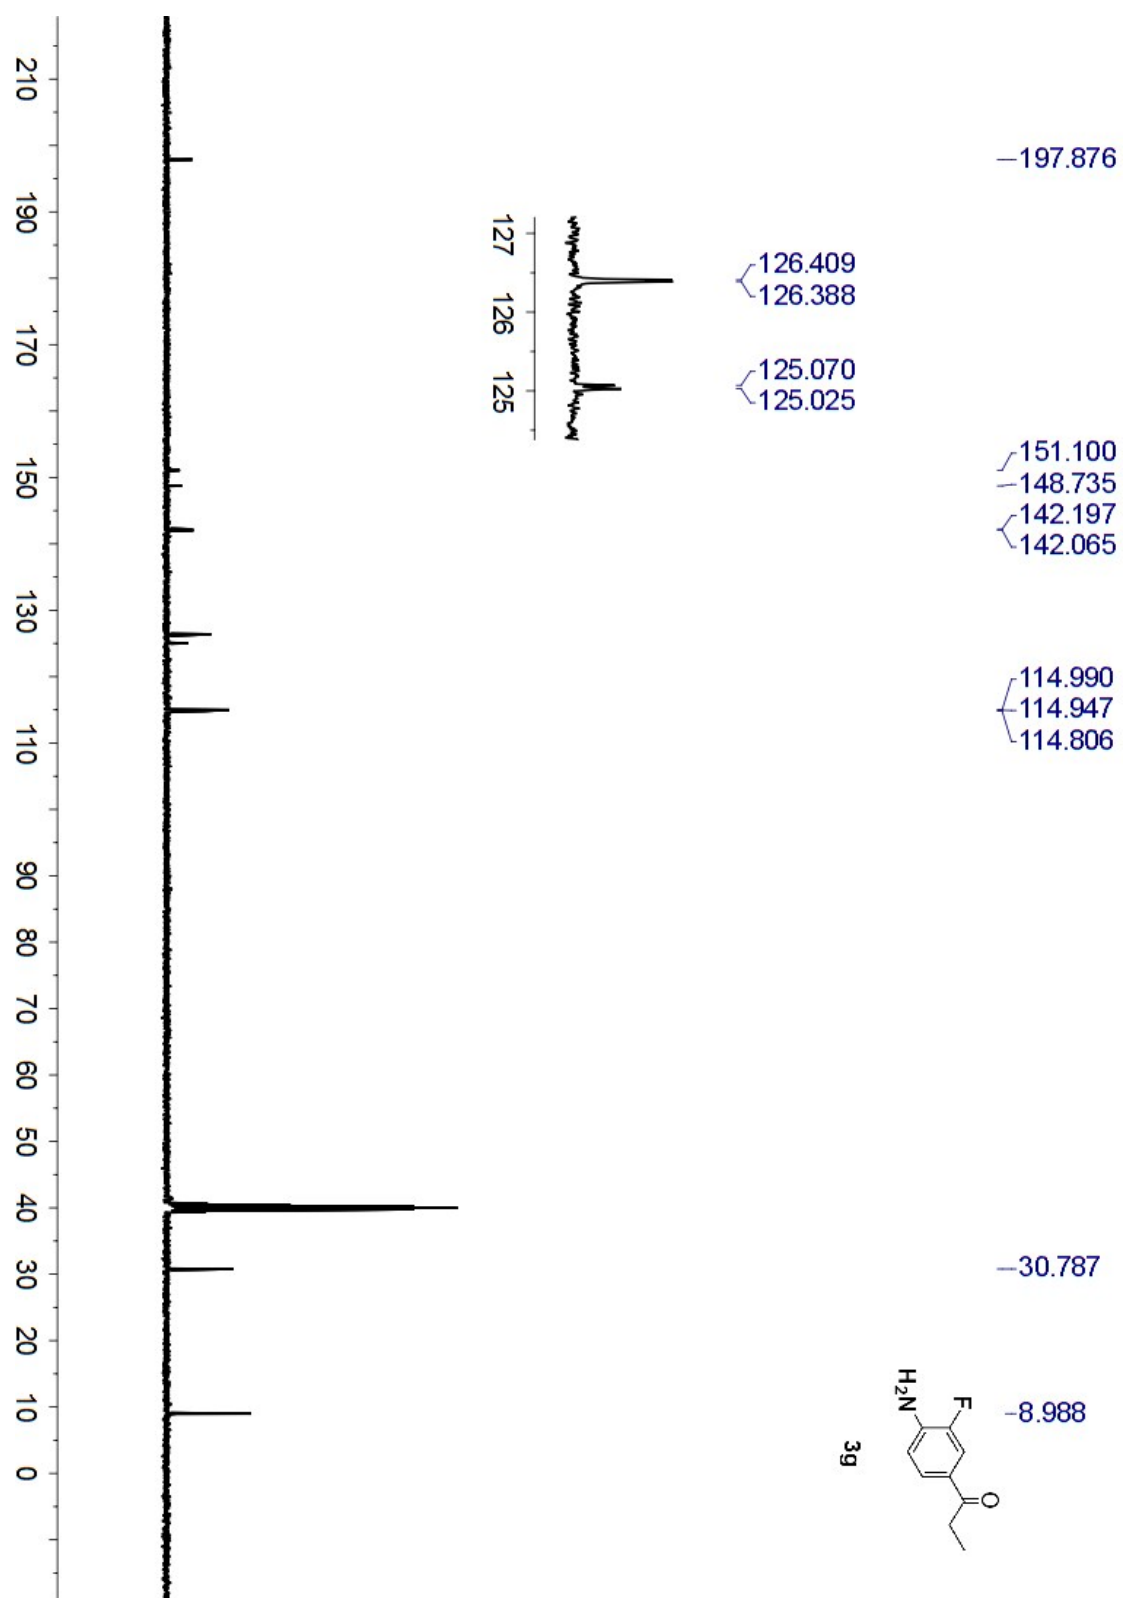

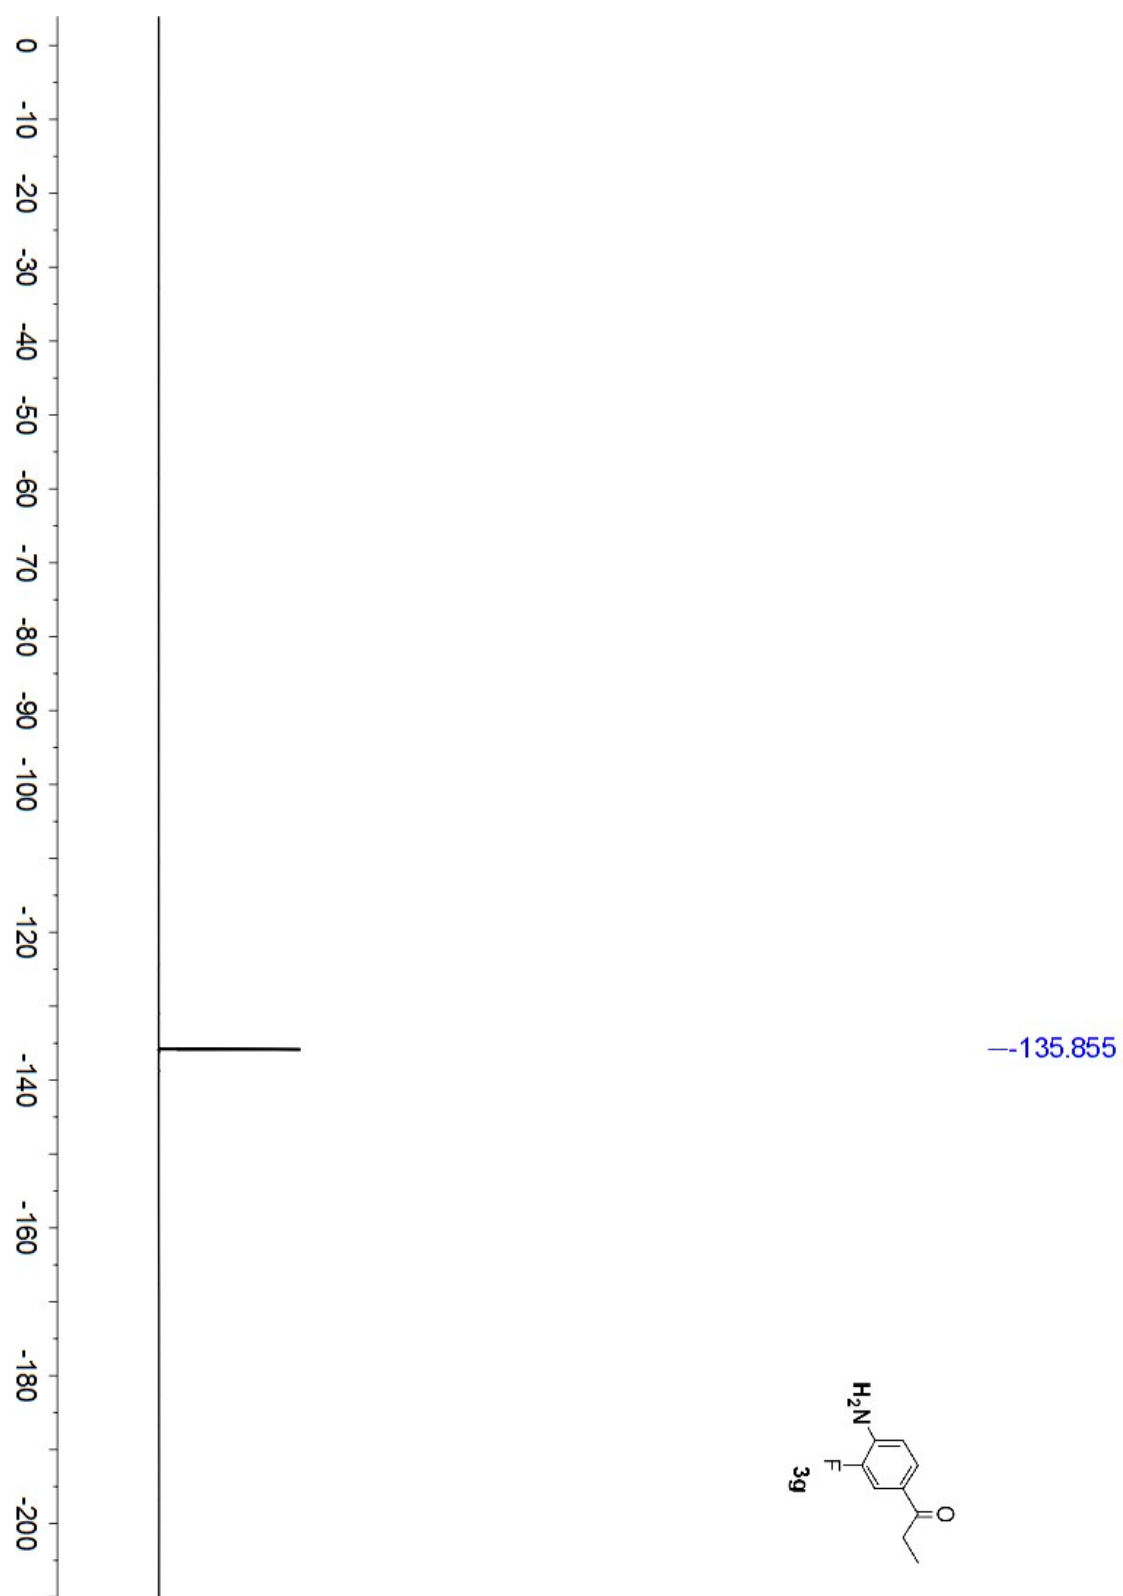

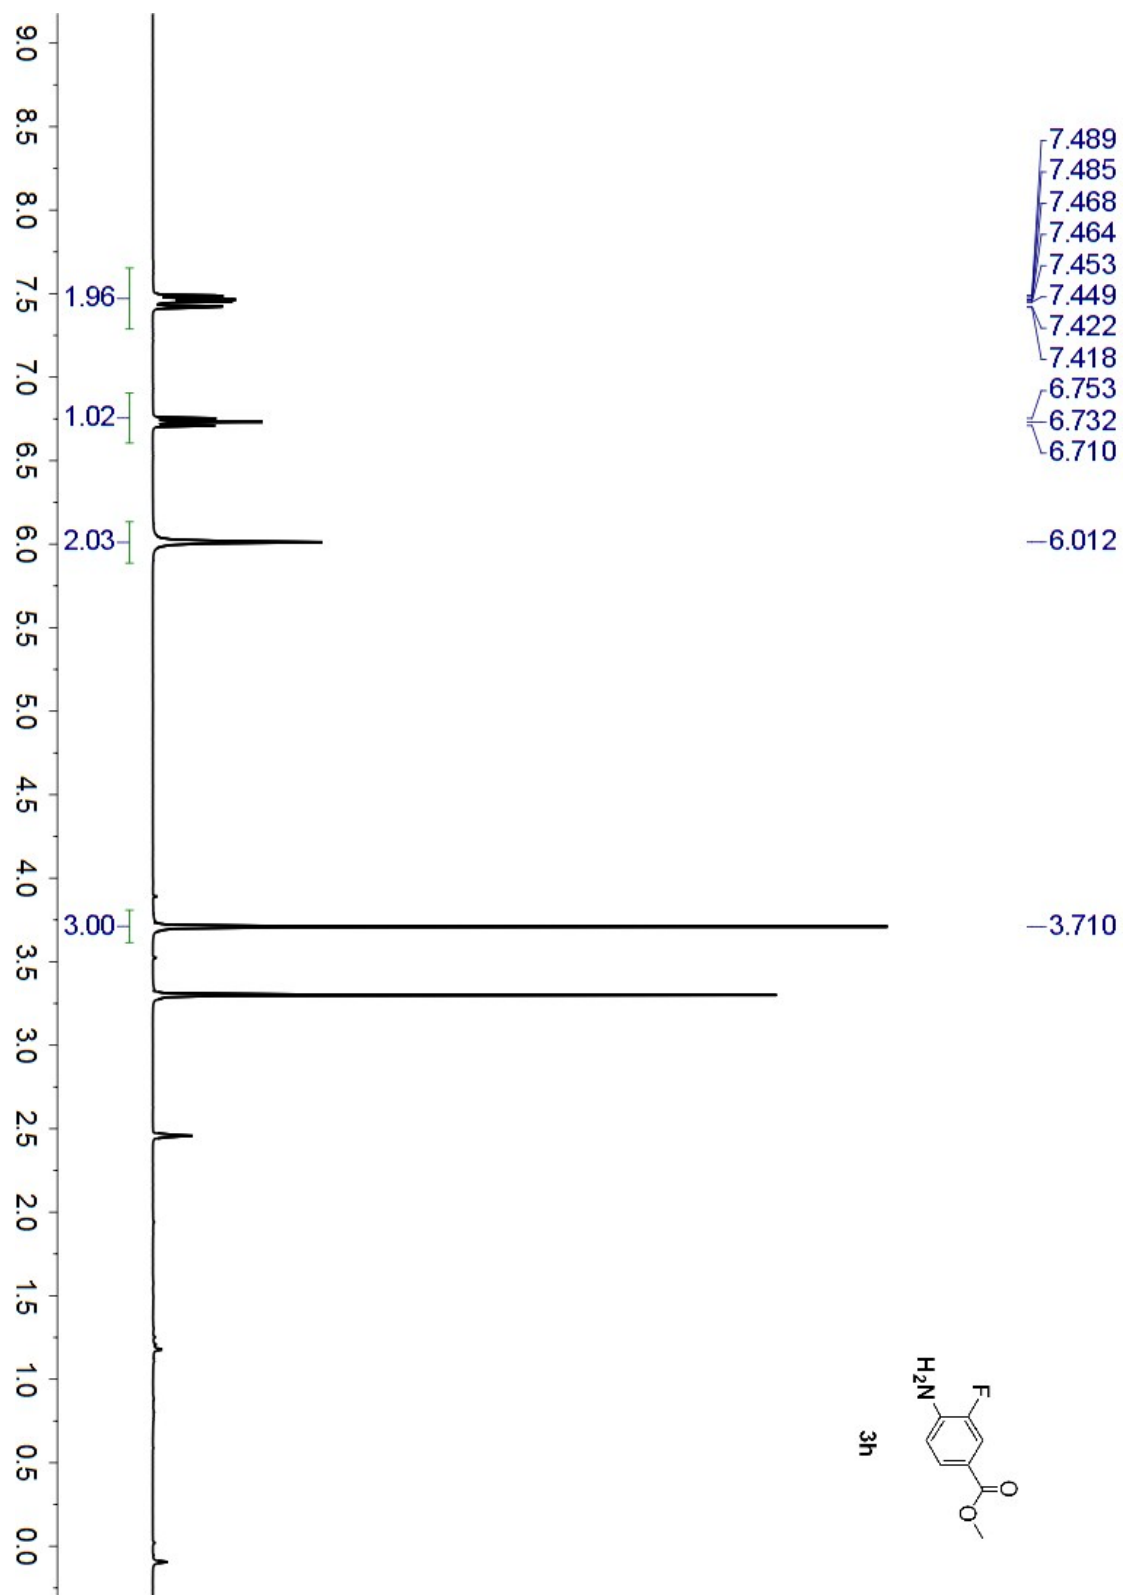

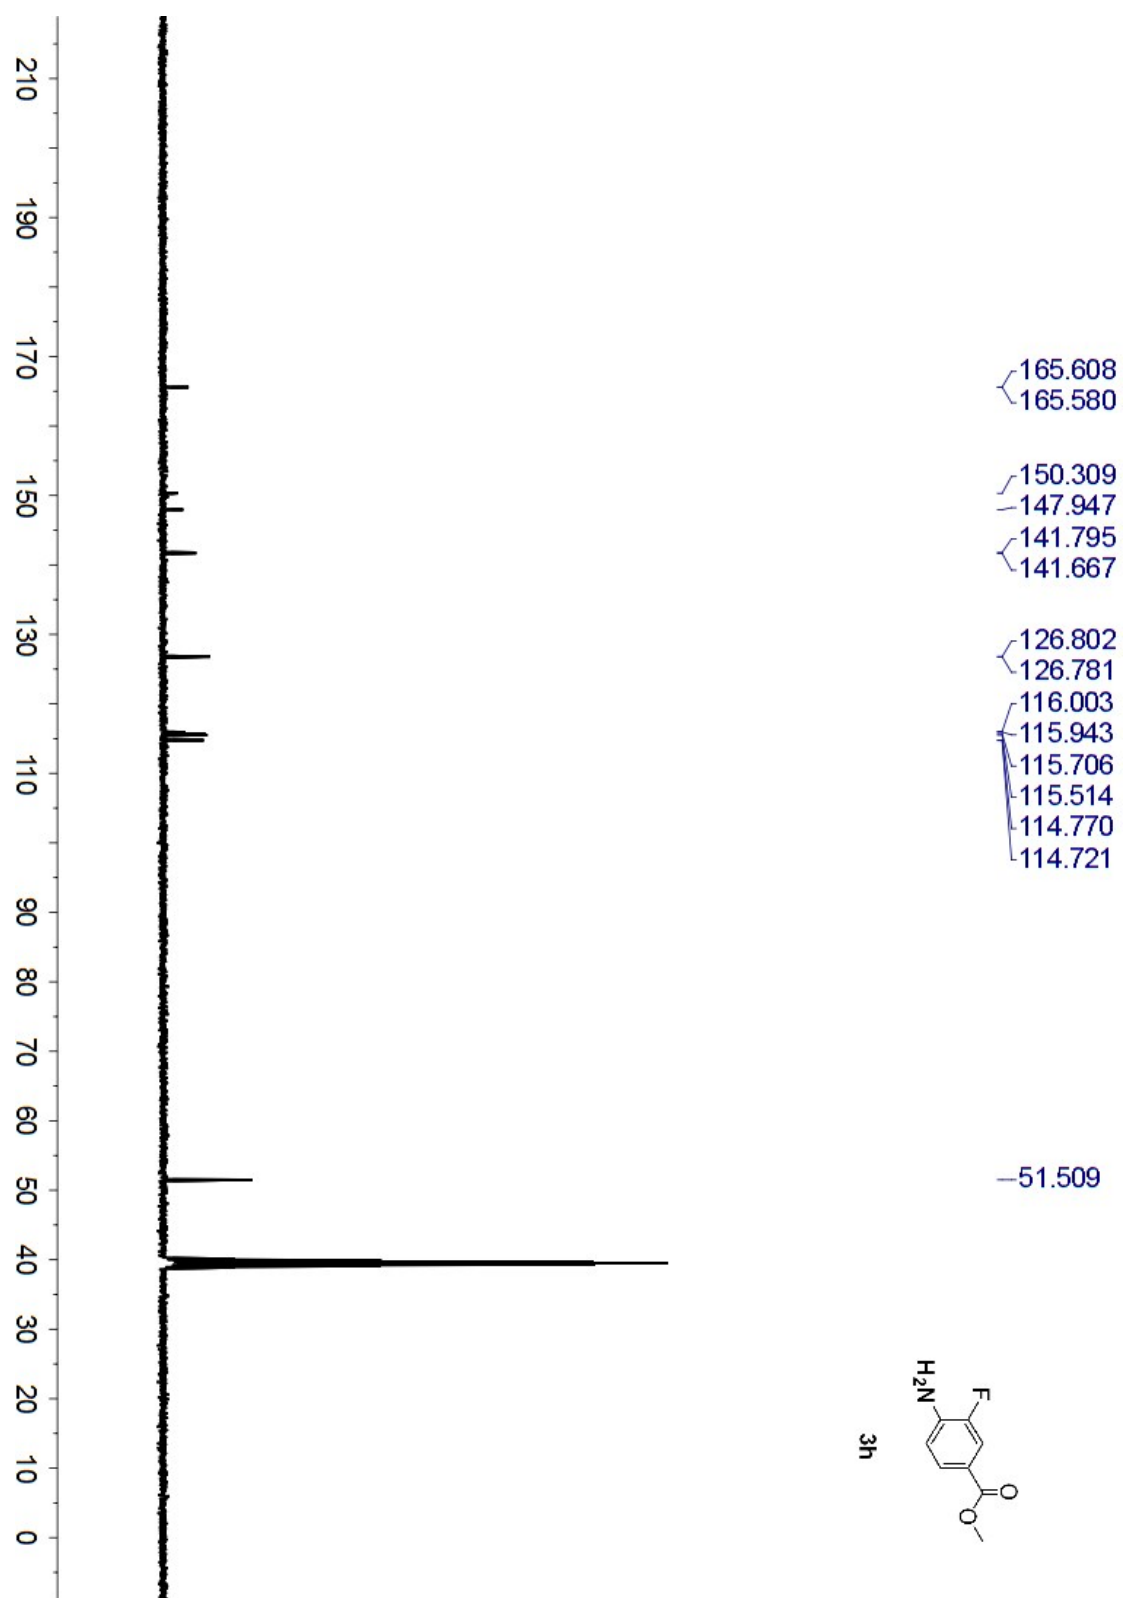



—136.011

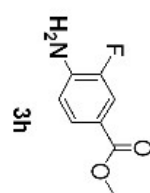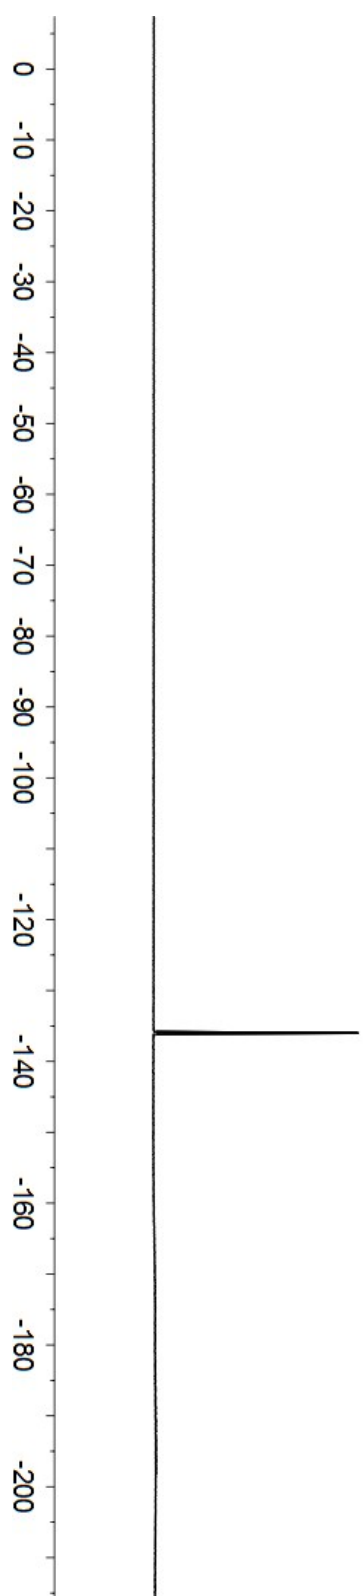

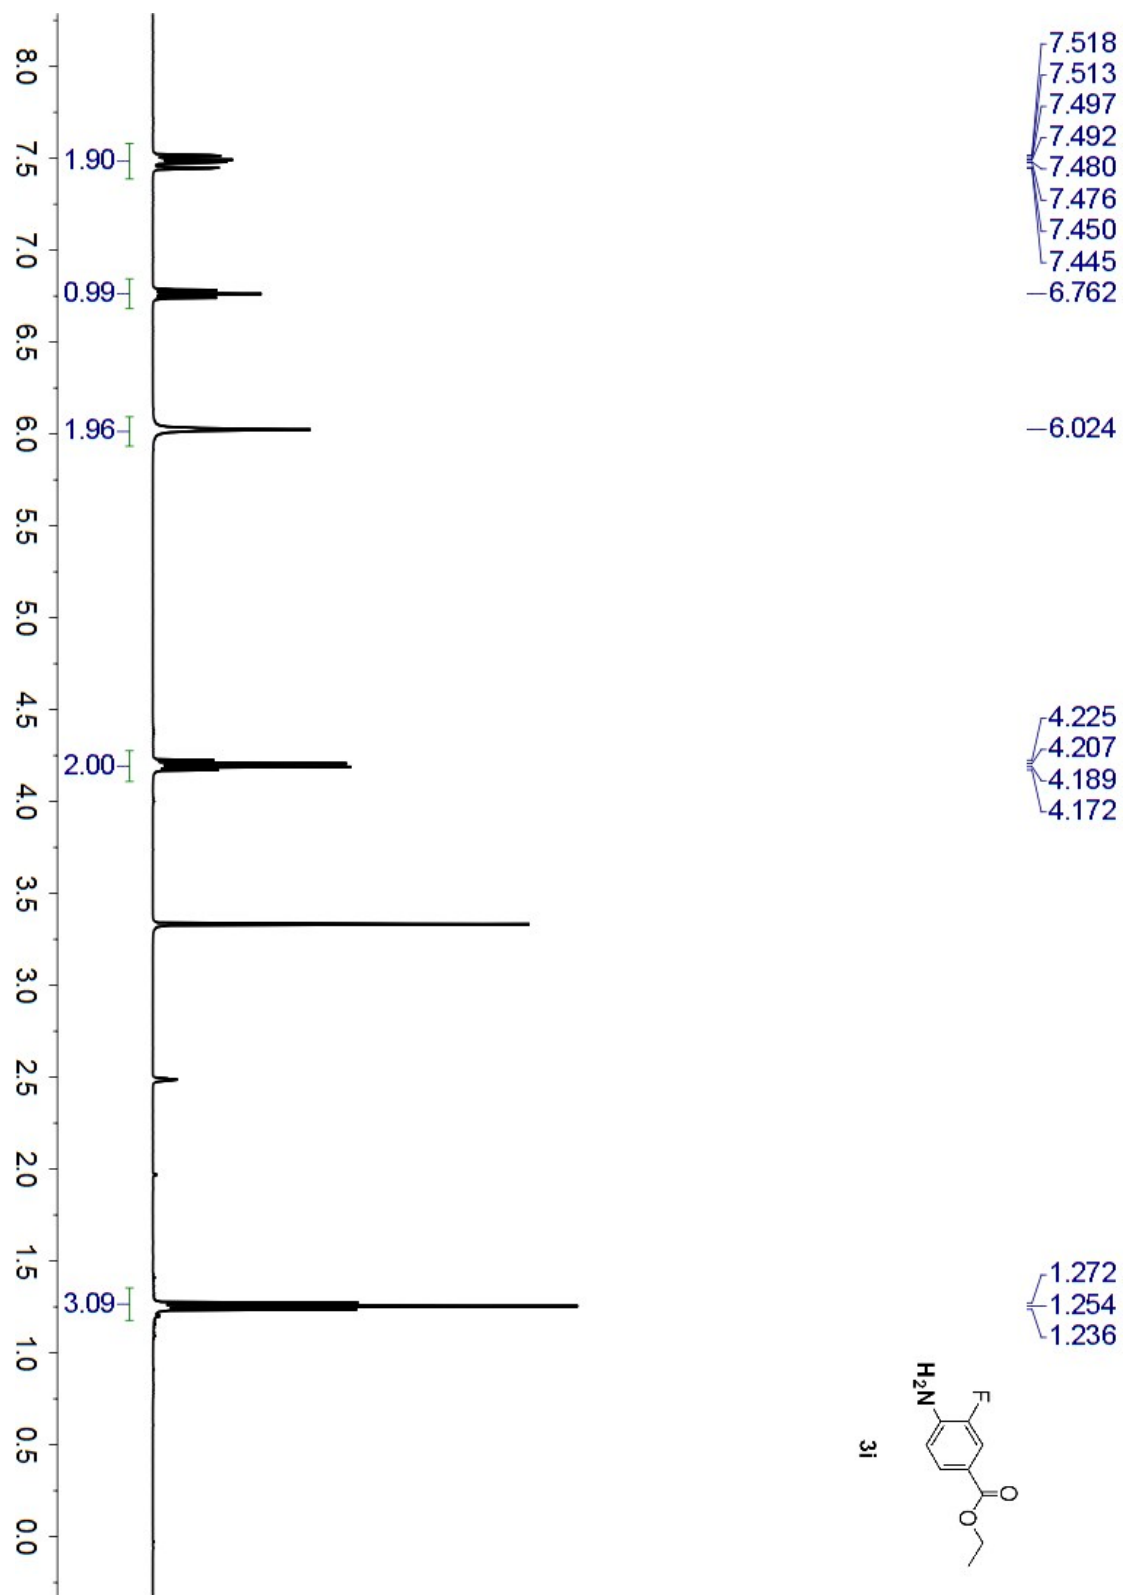

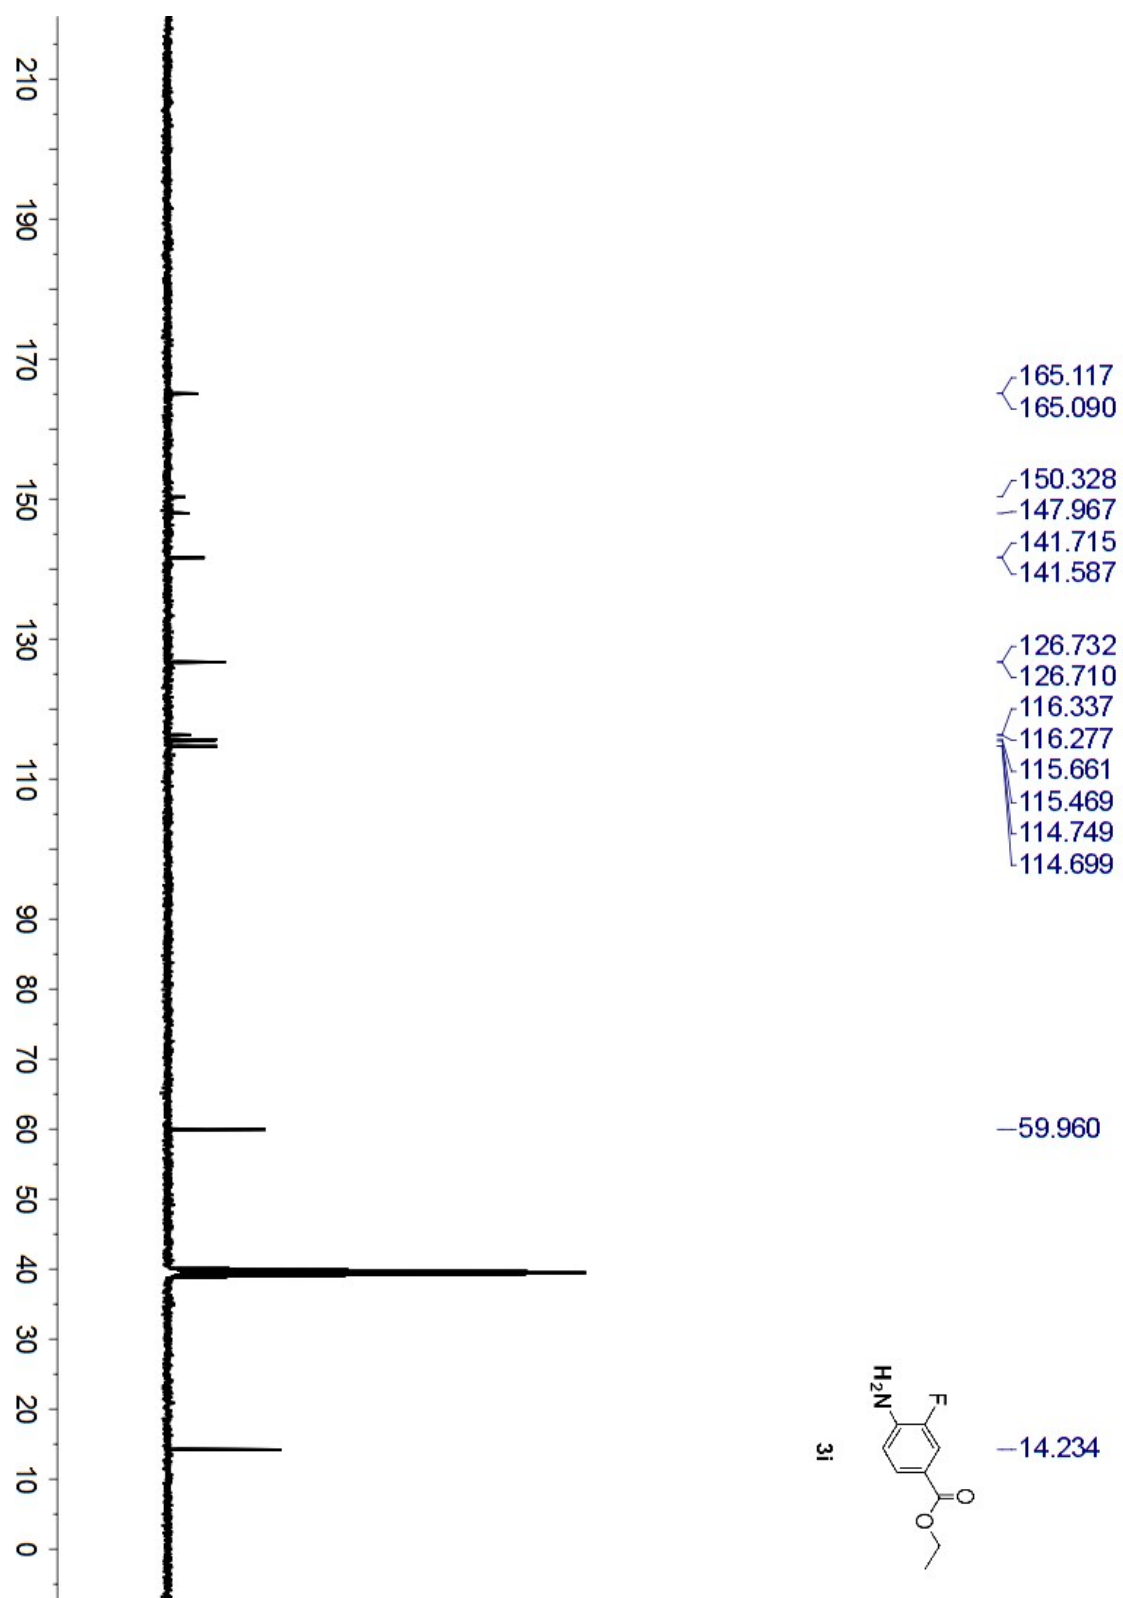

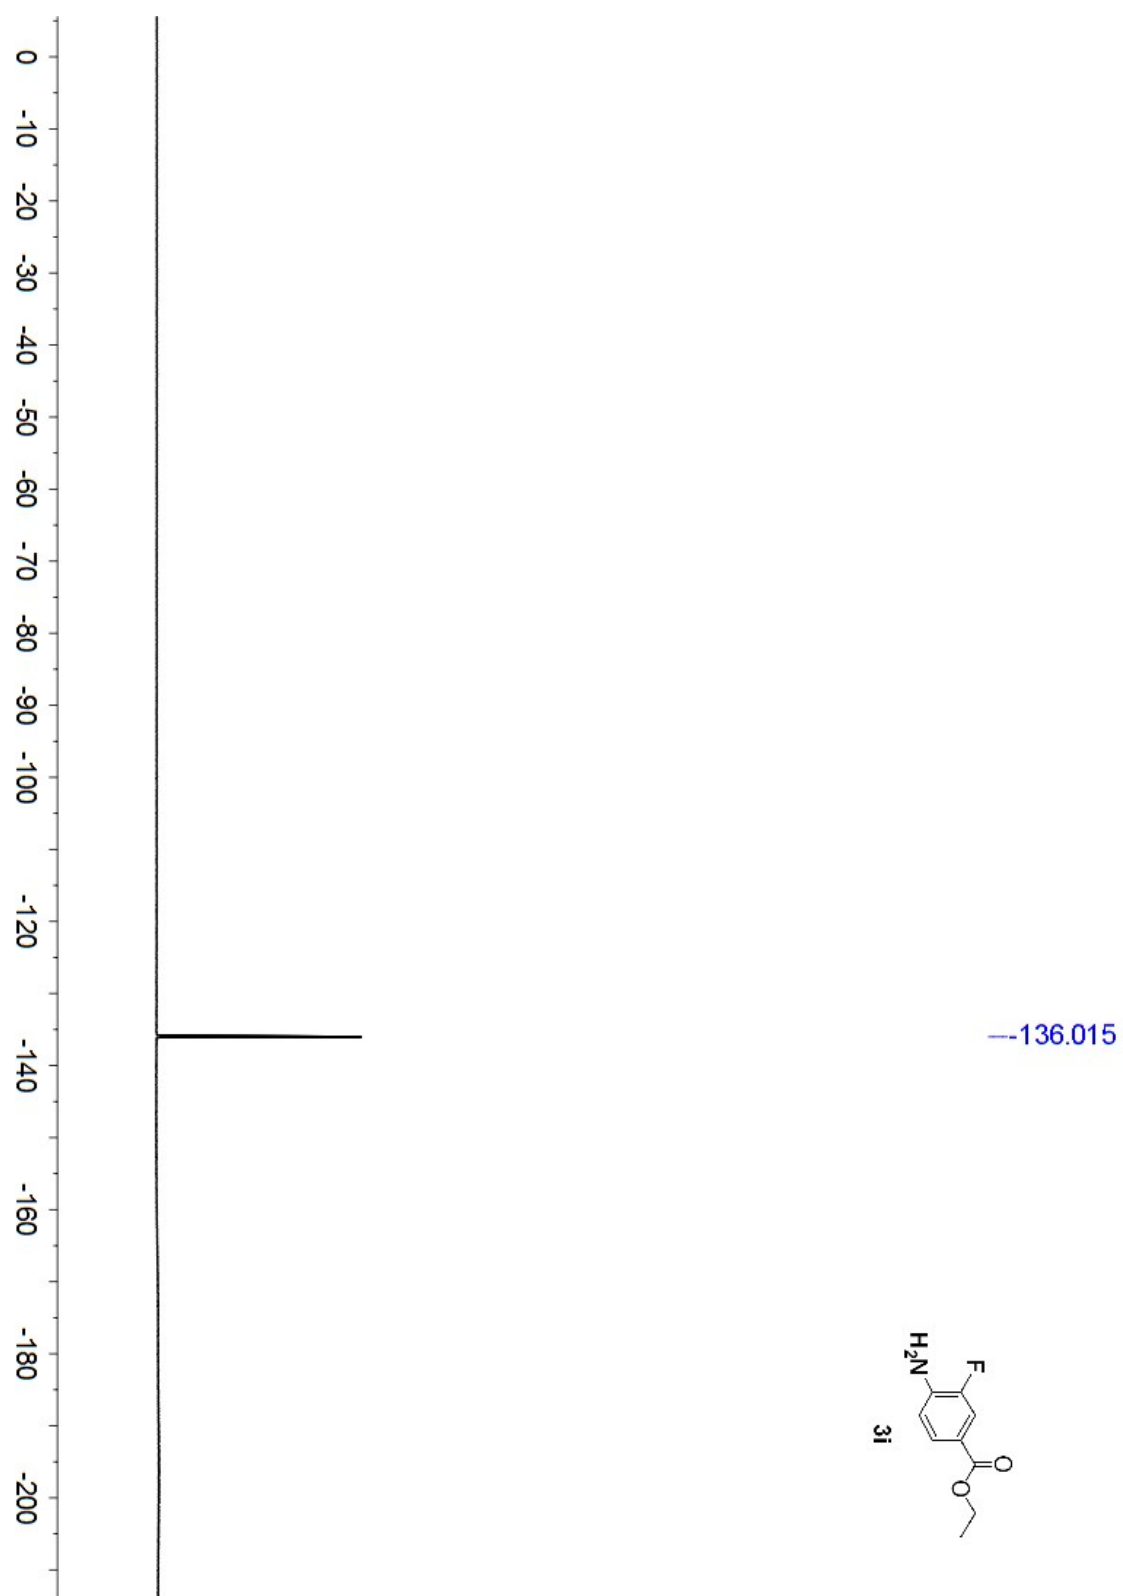

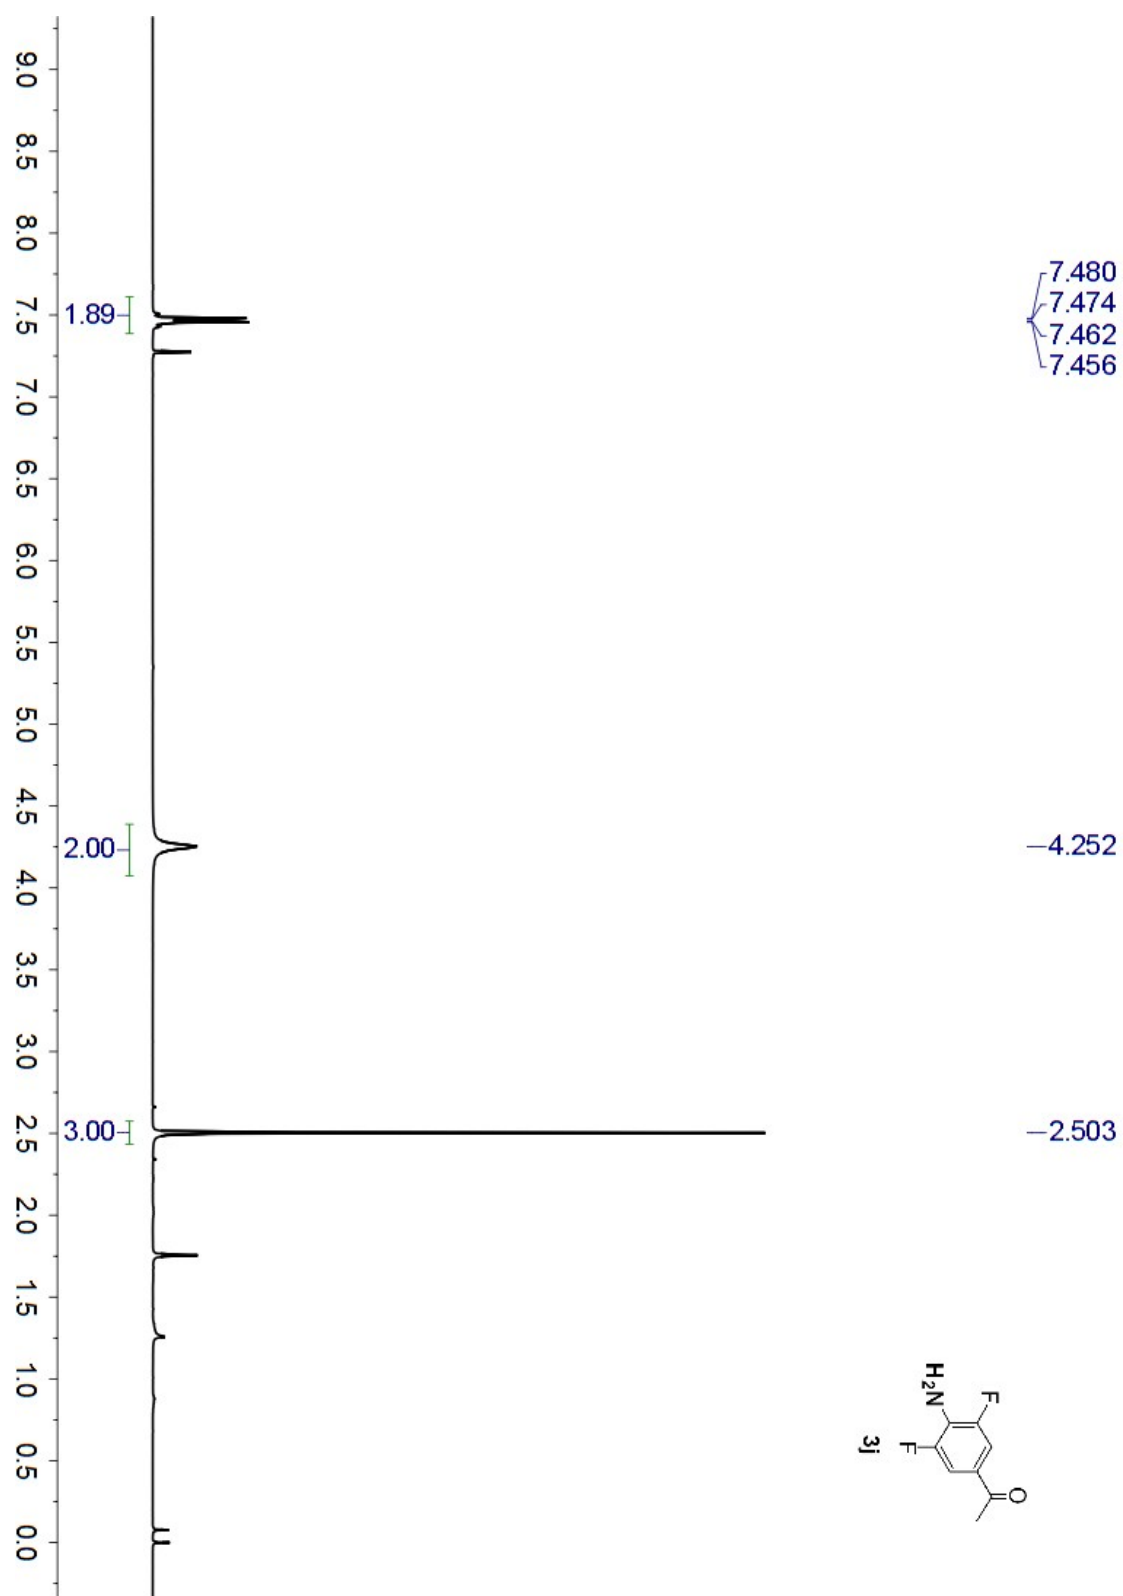

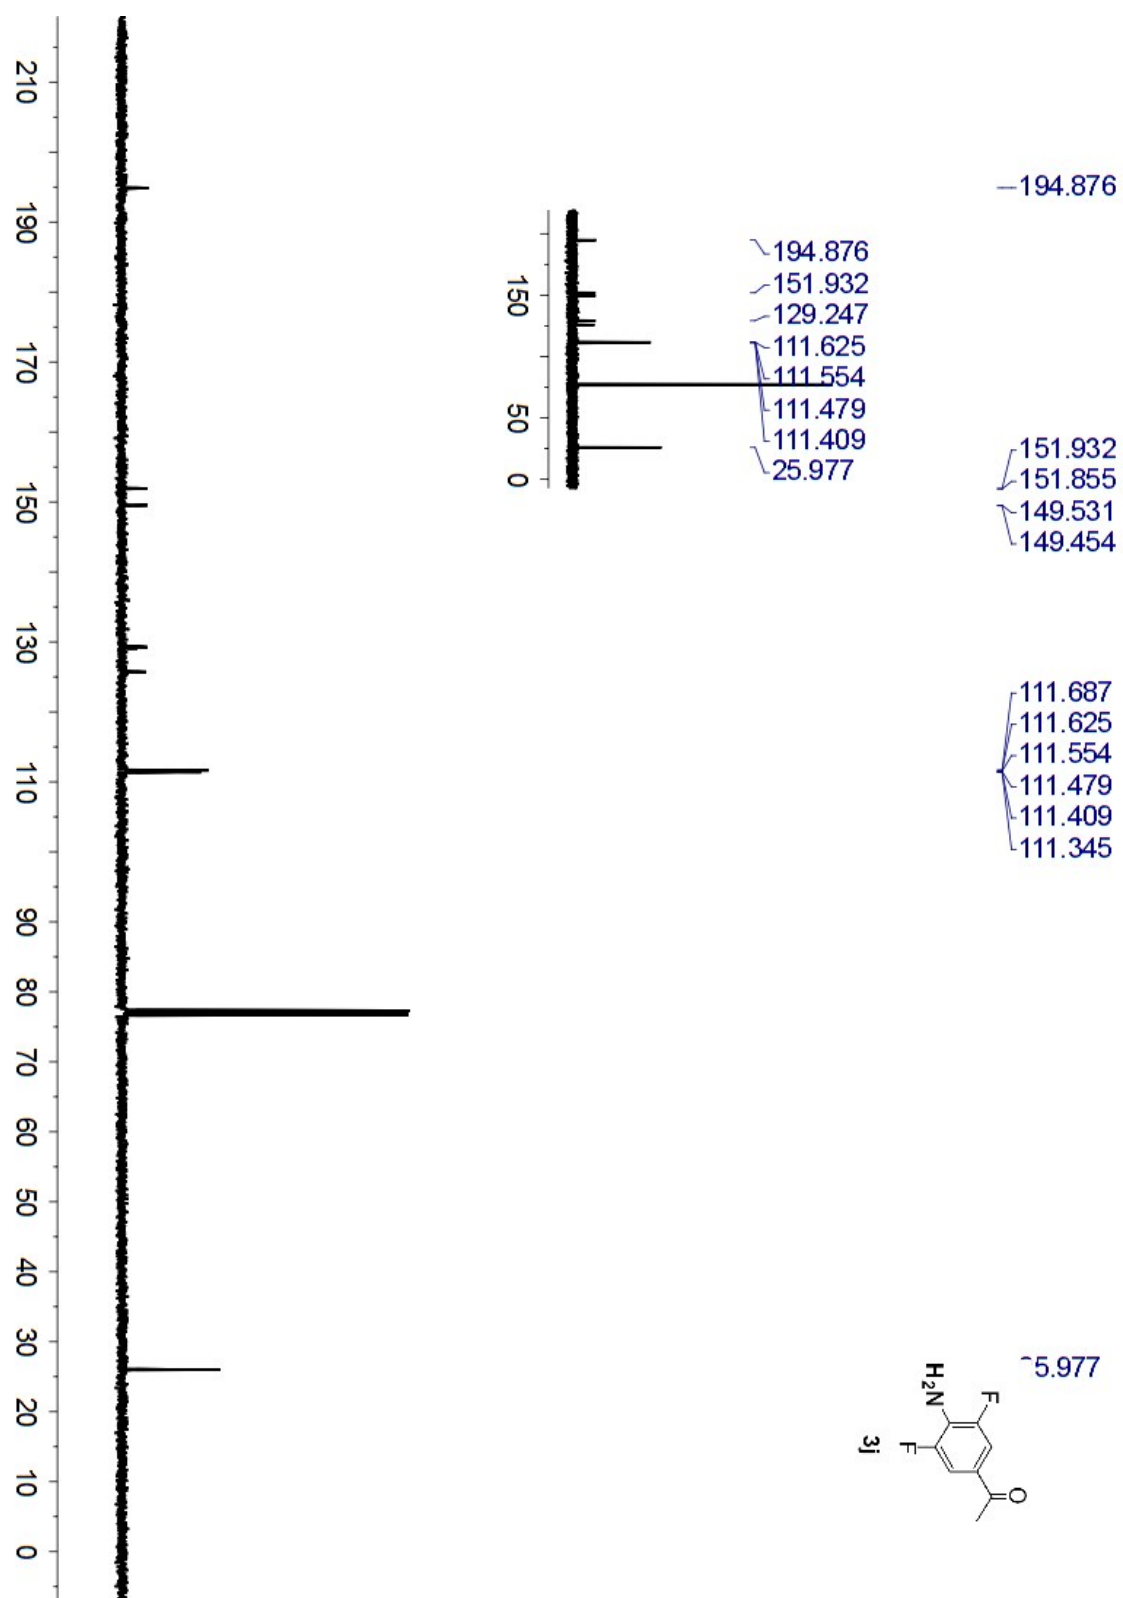

→132.681

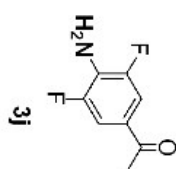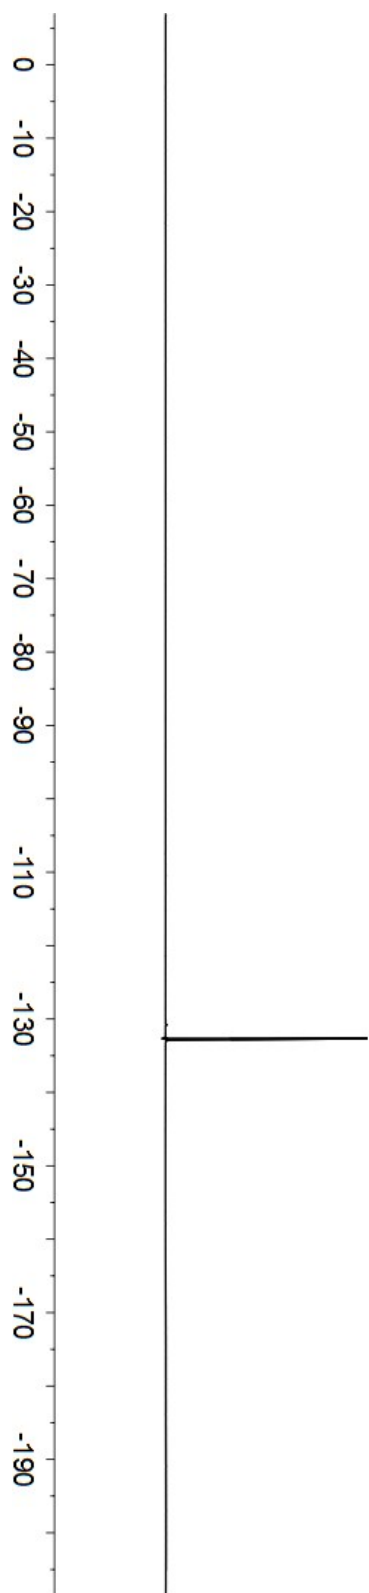

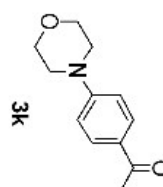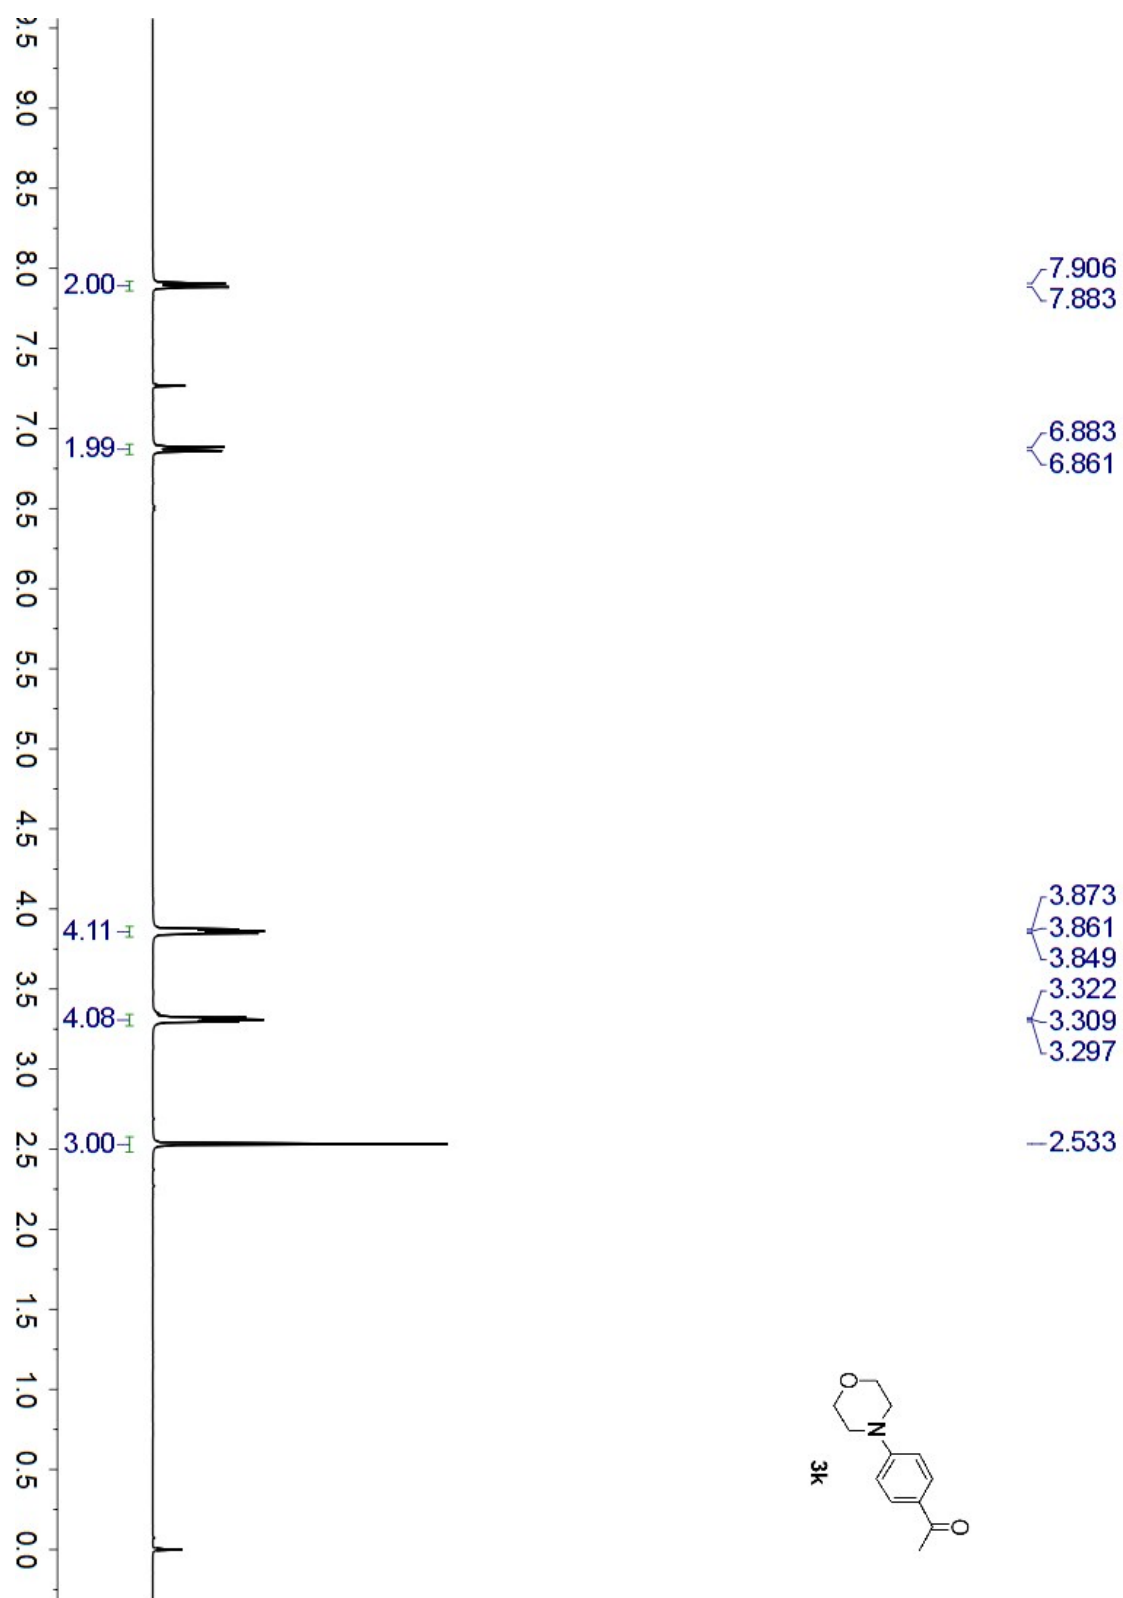



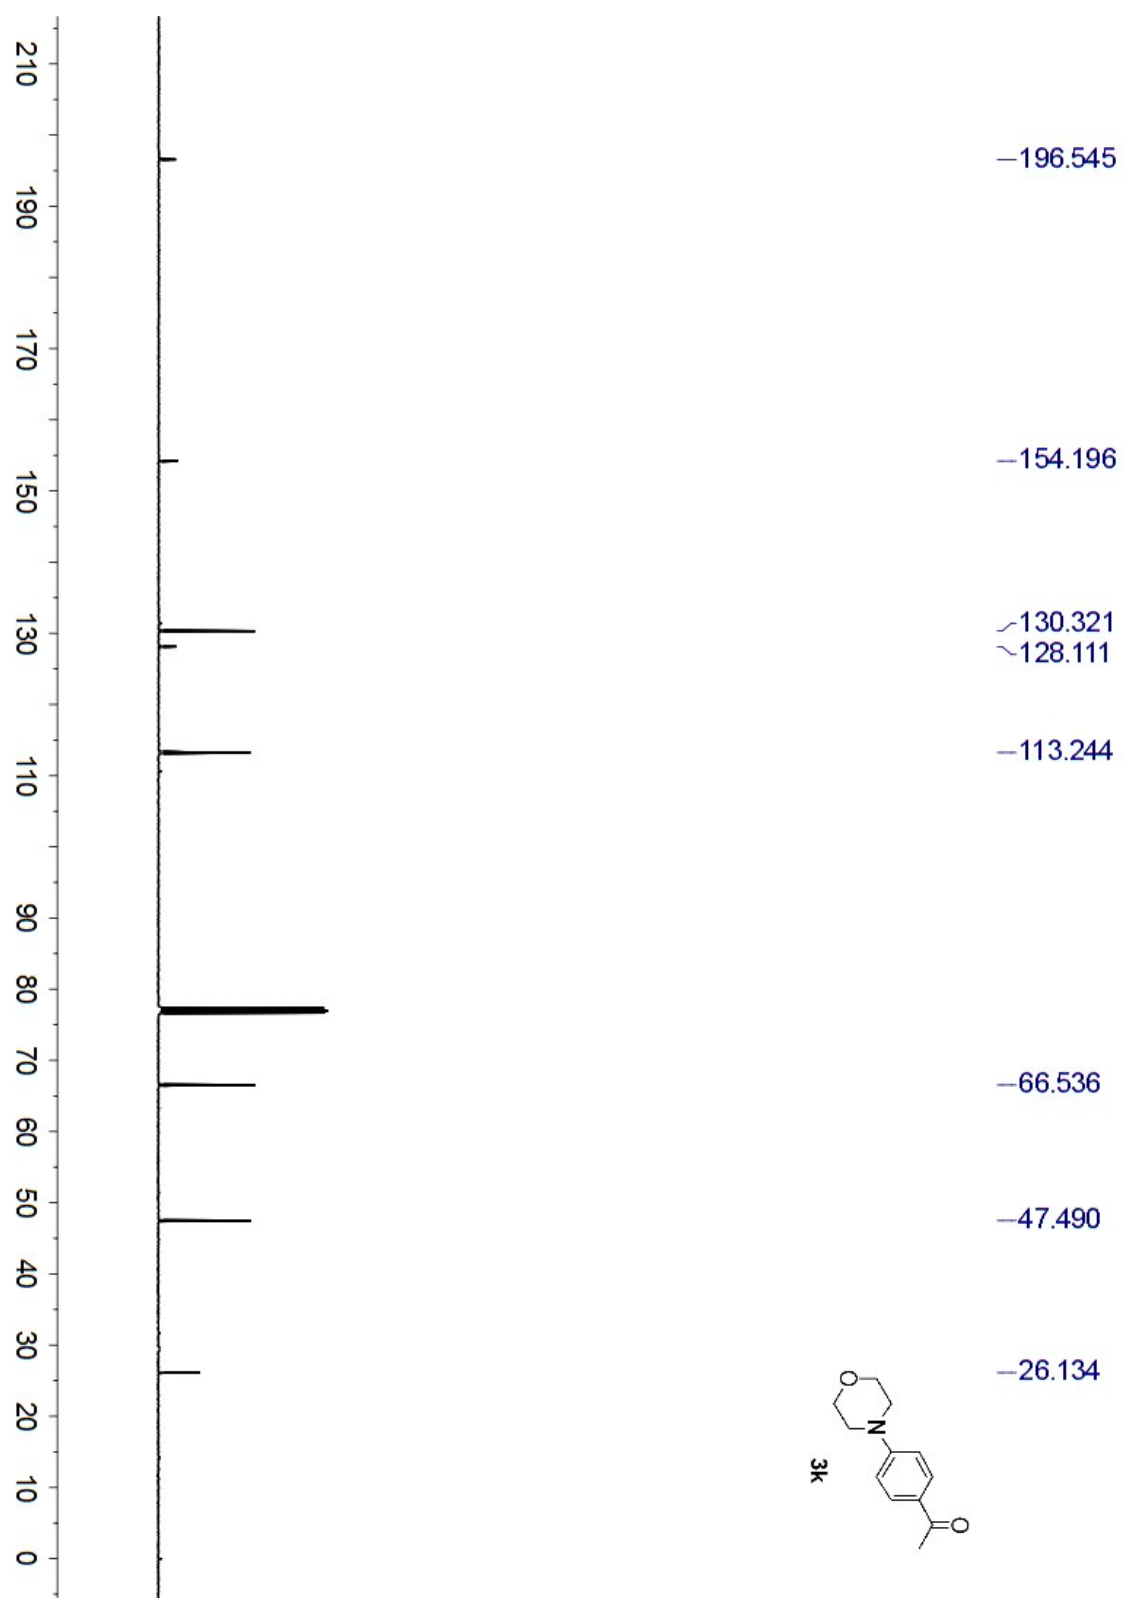

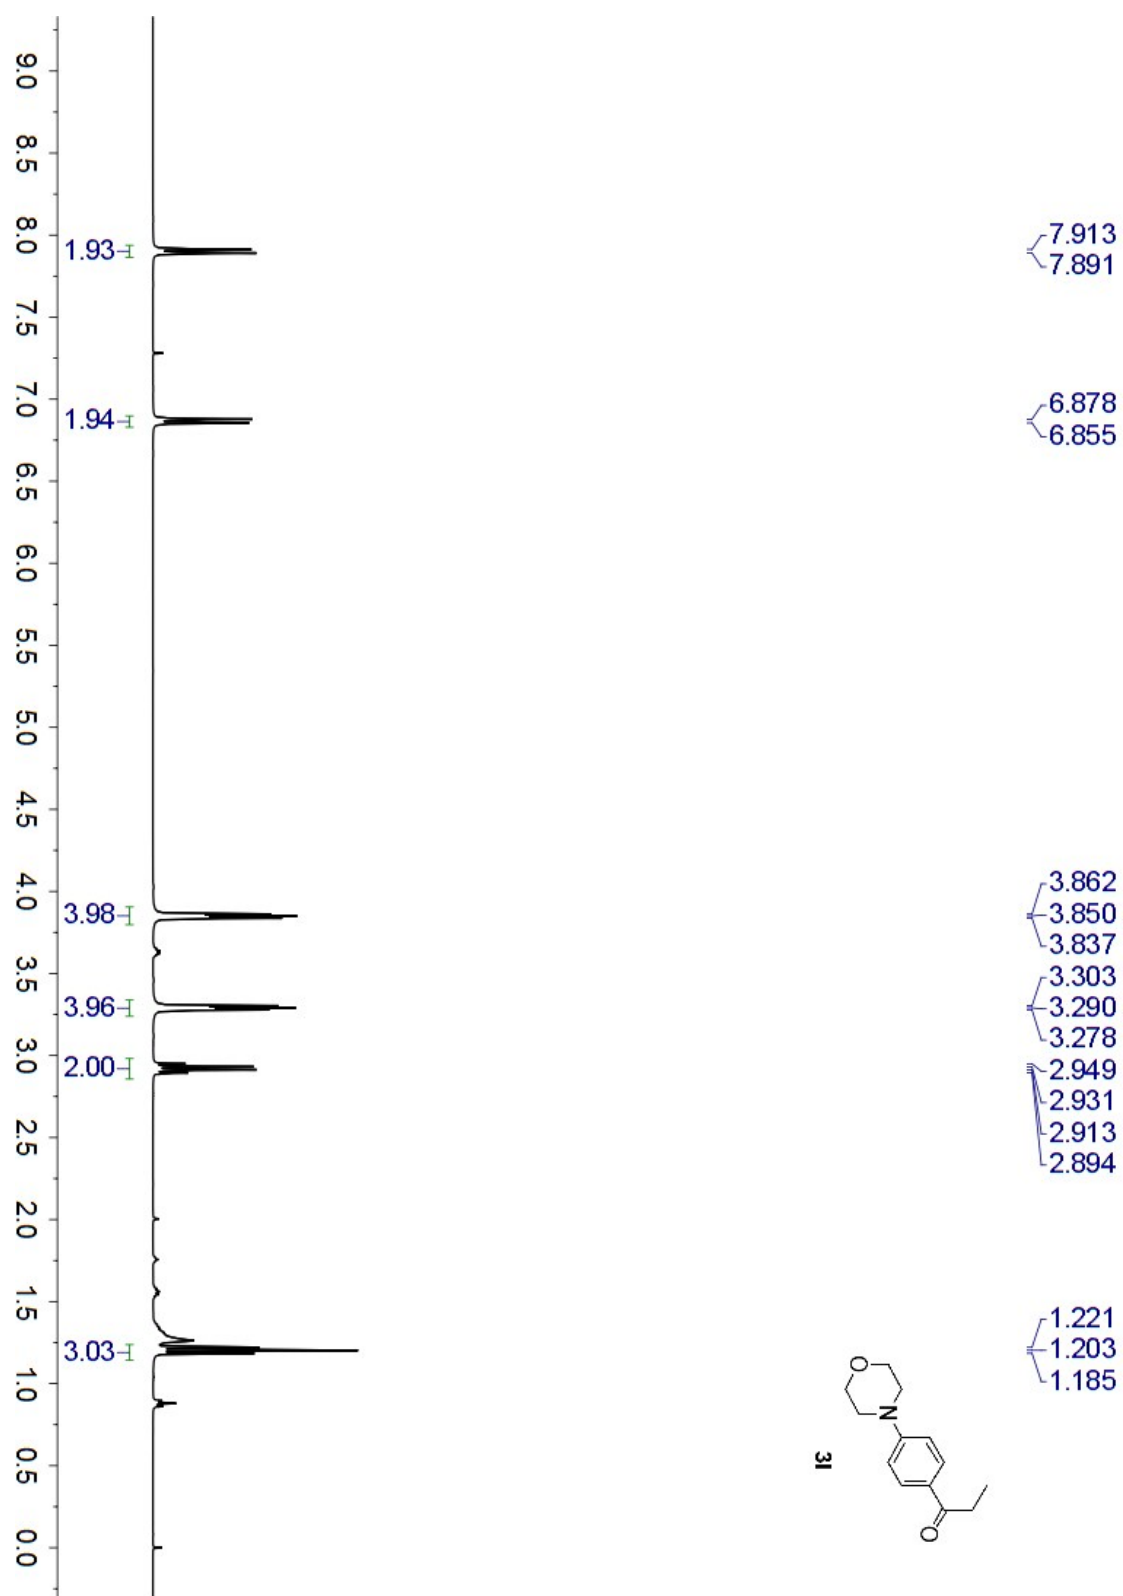

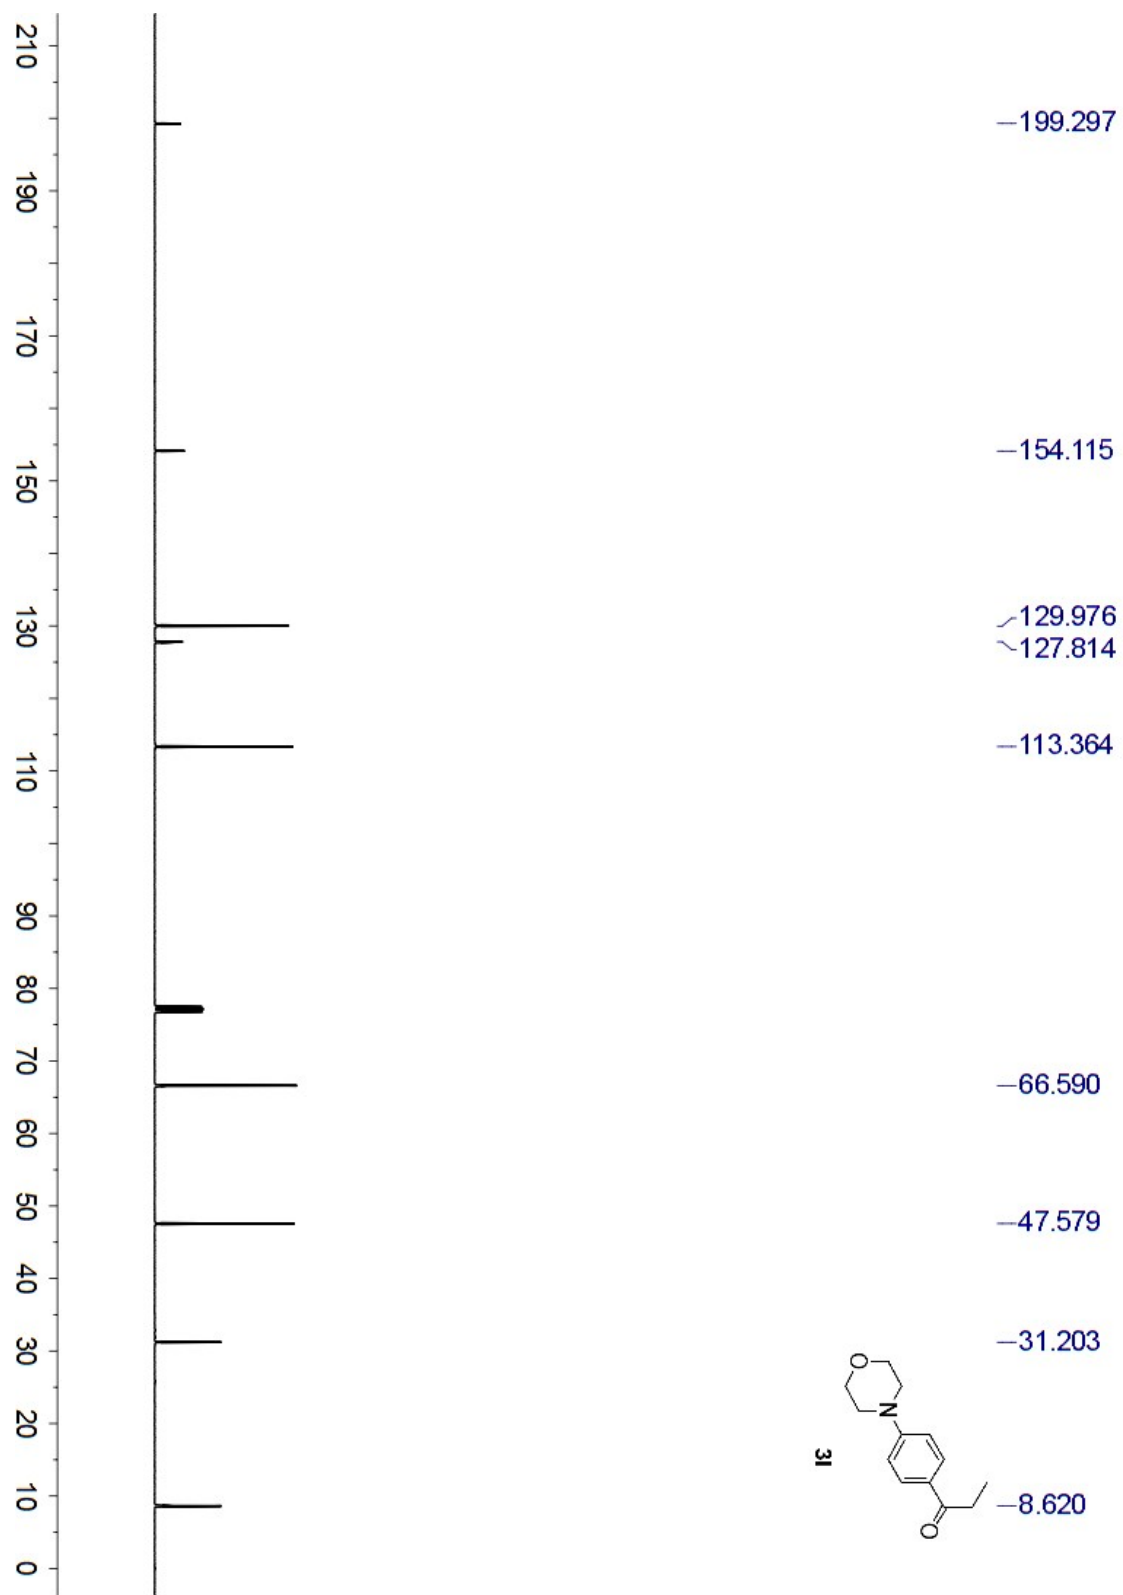

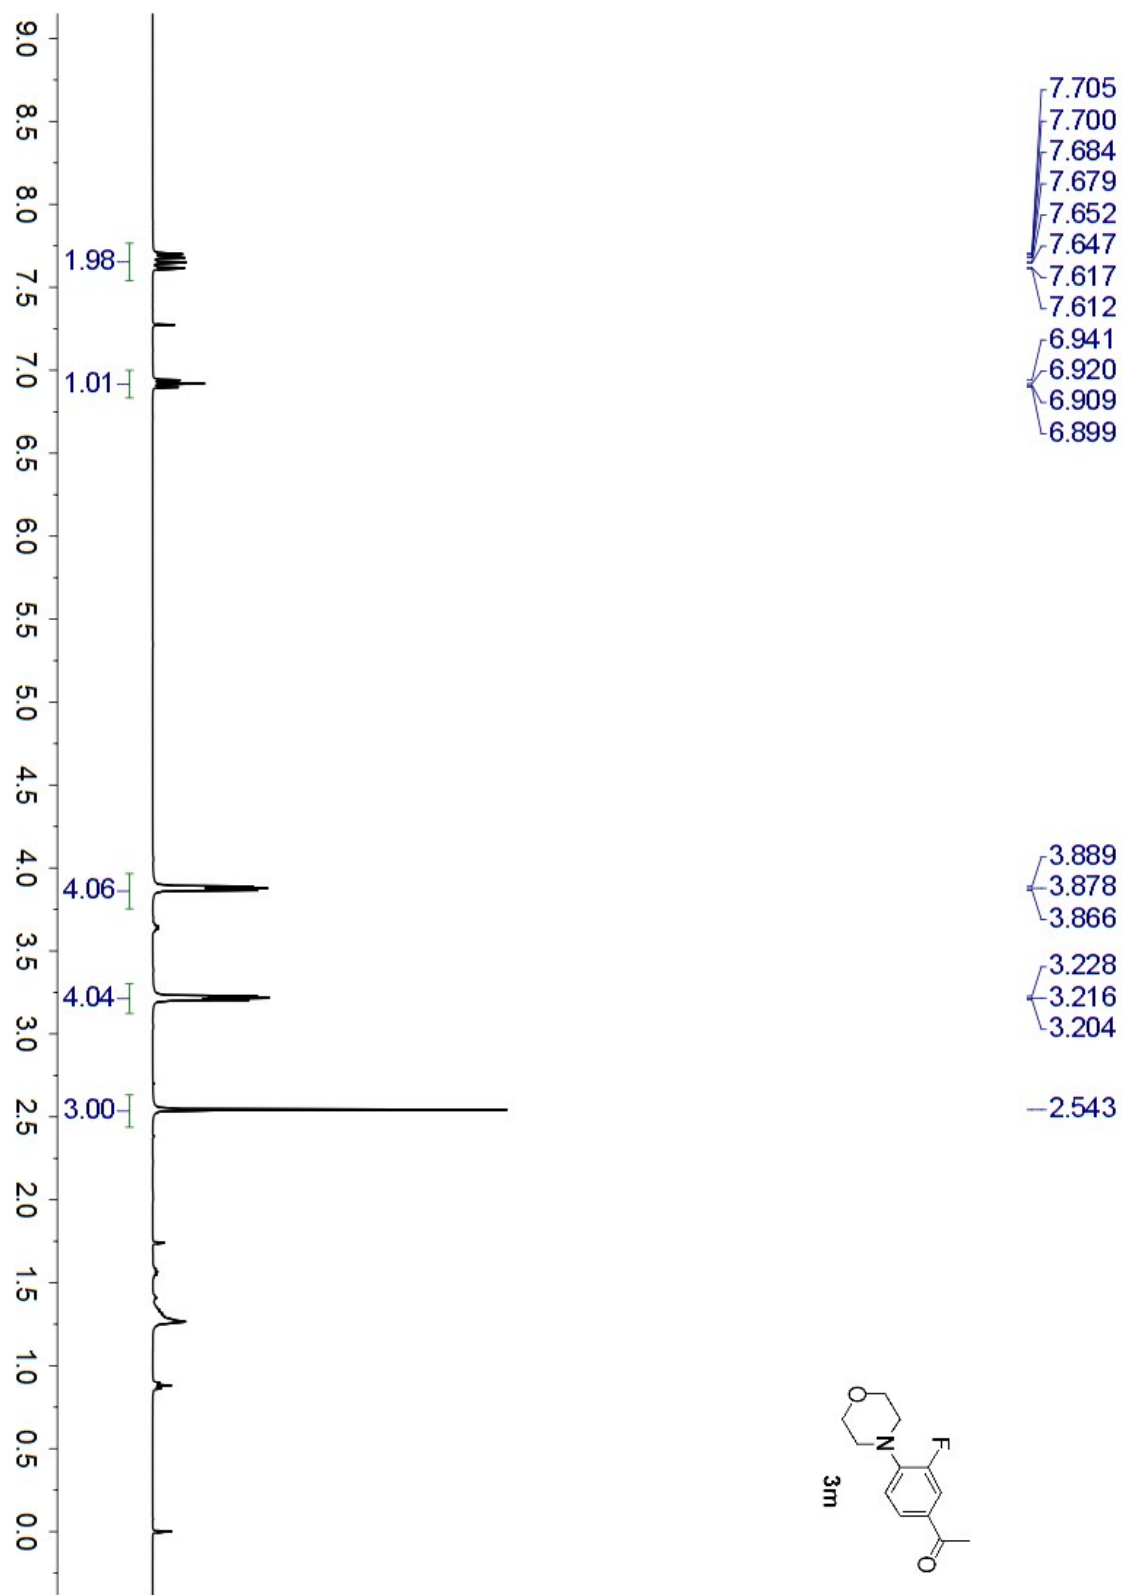

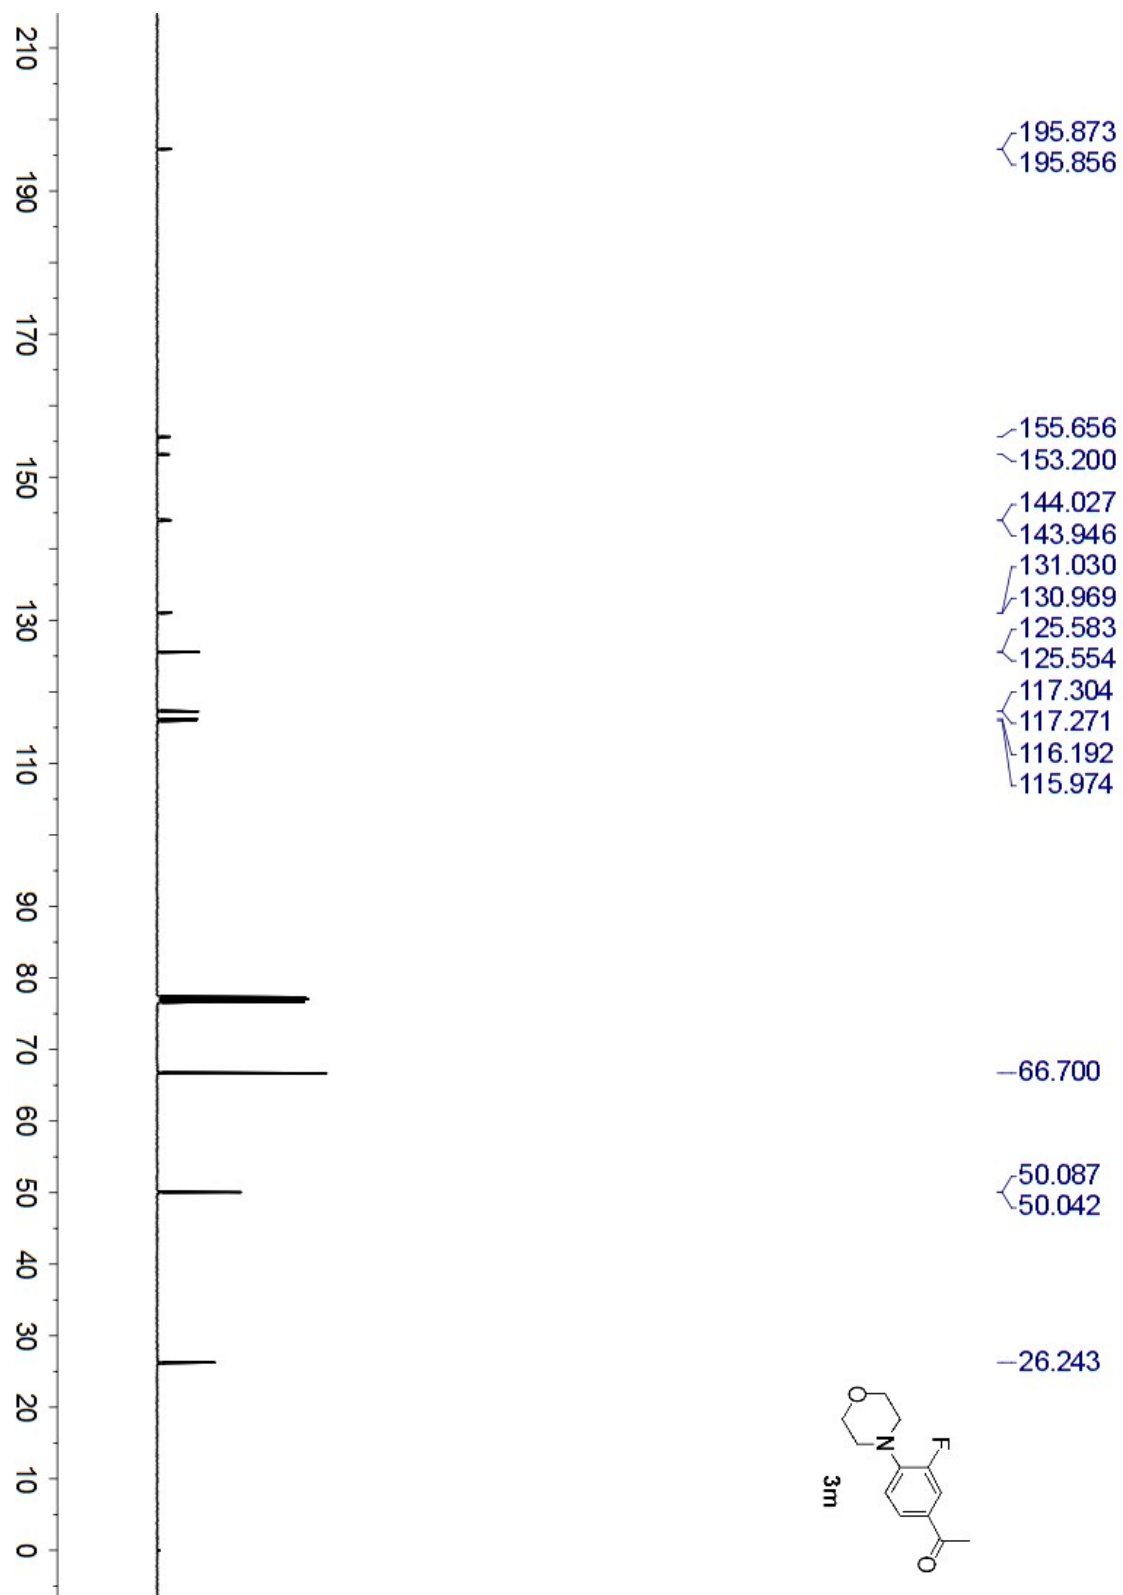

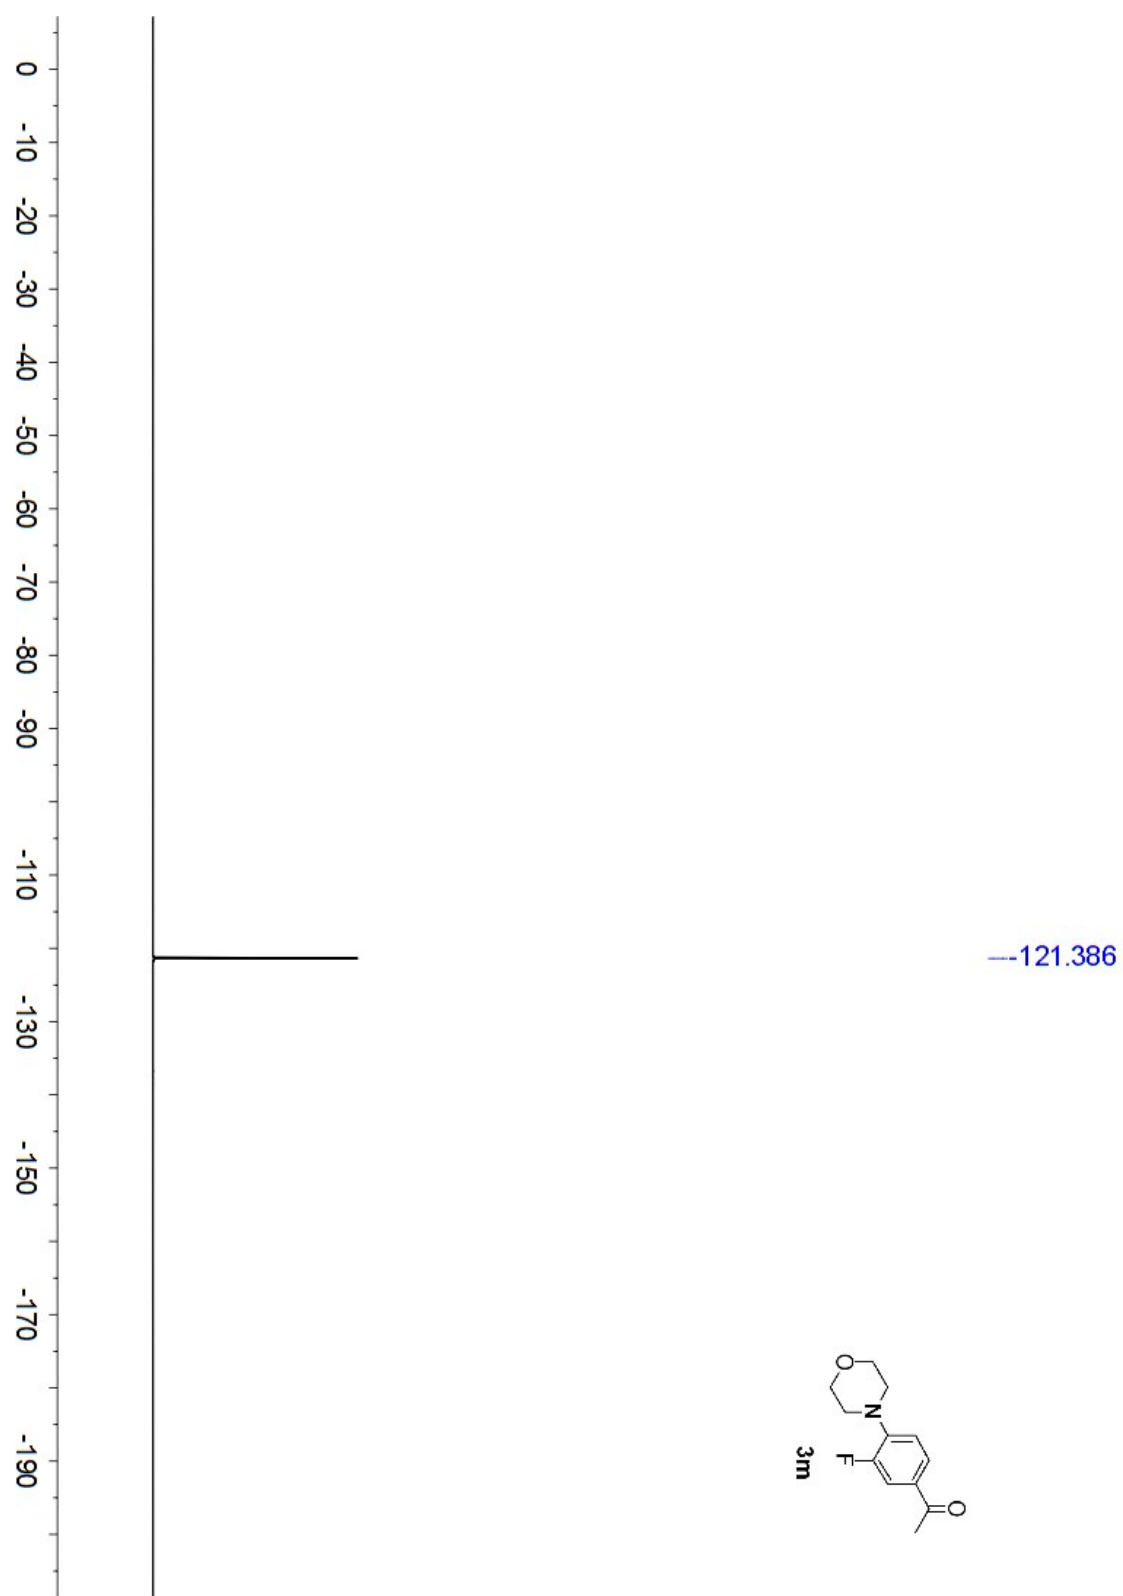

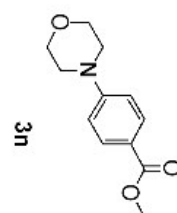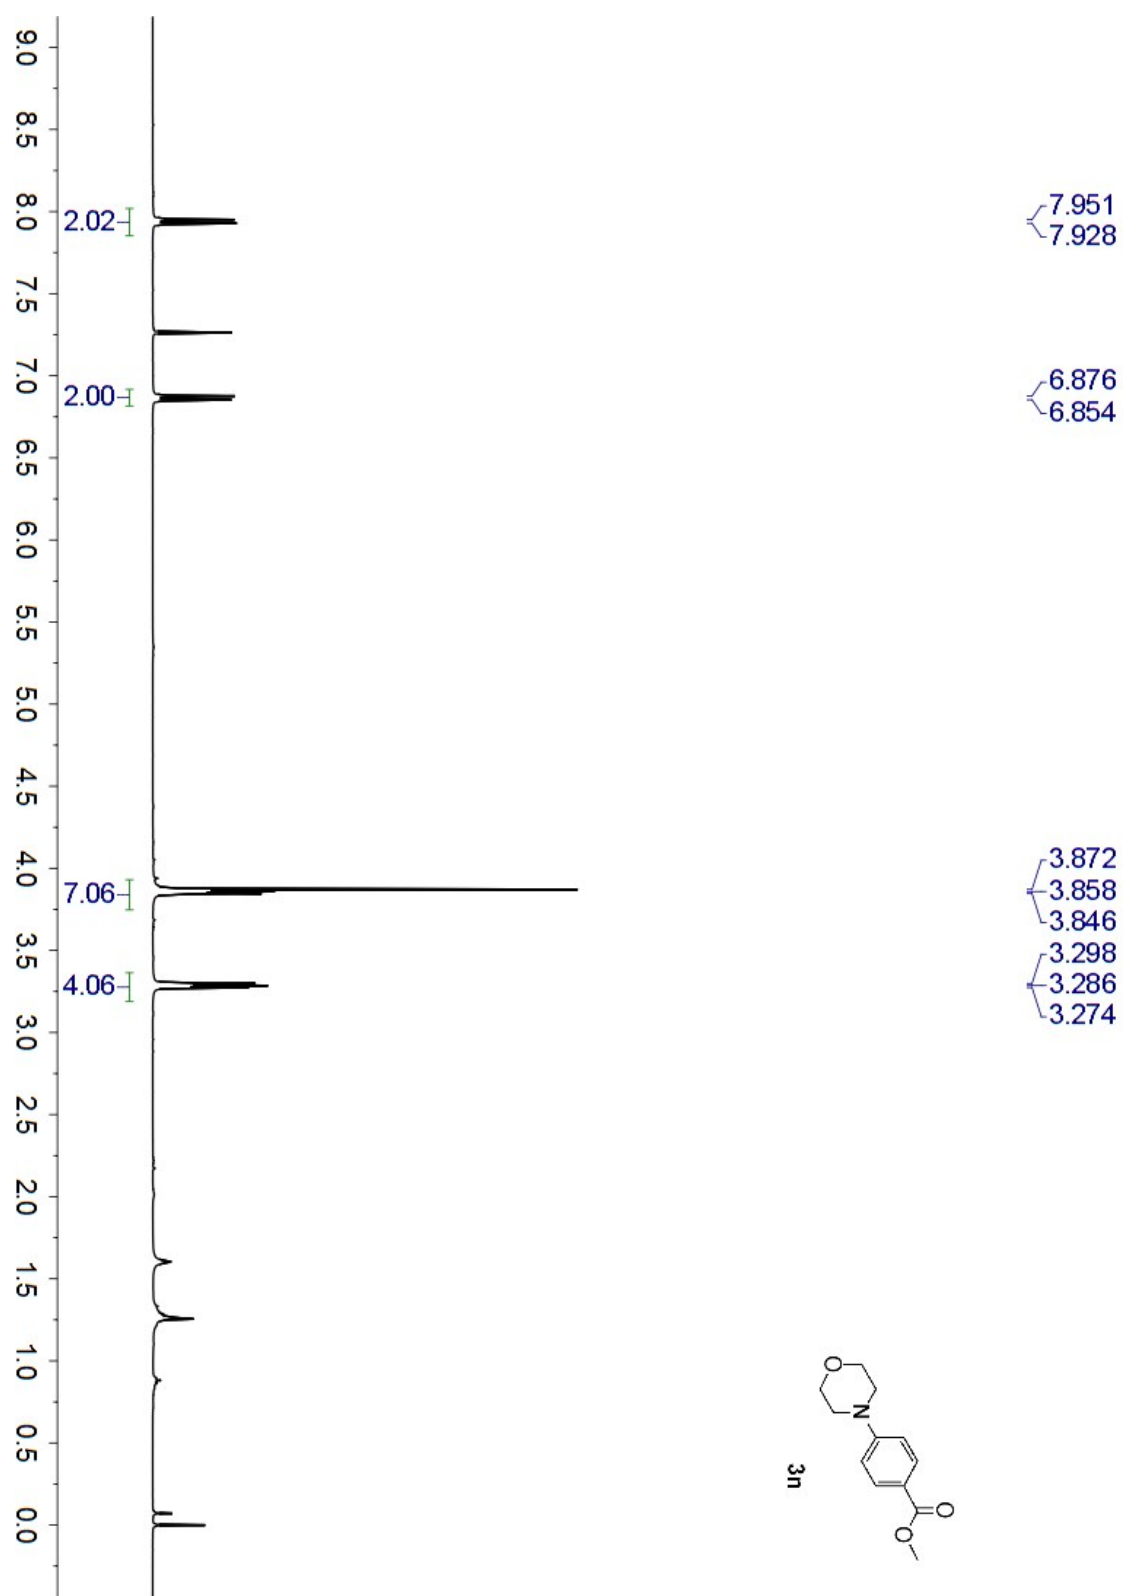

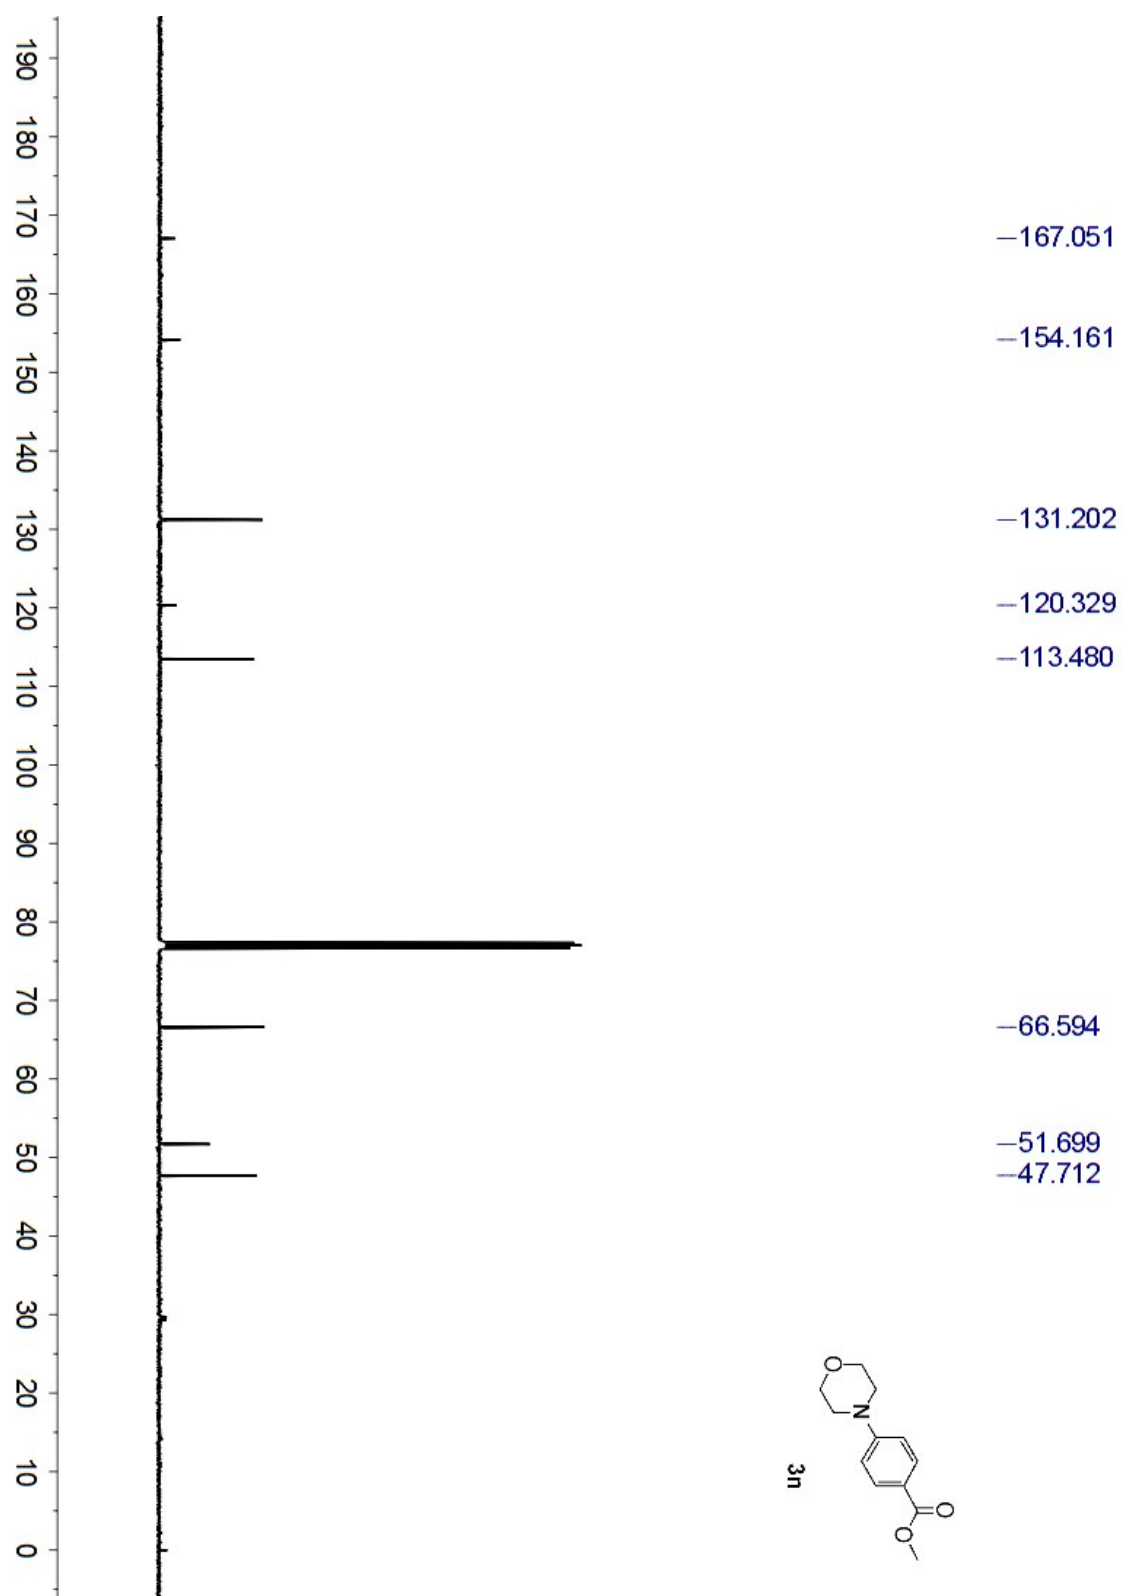



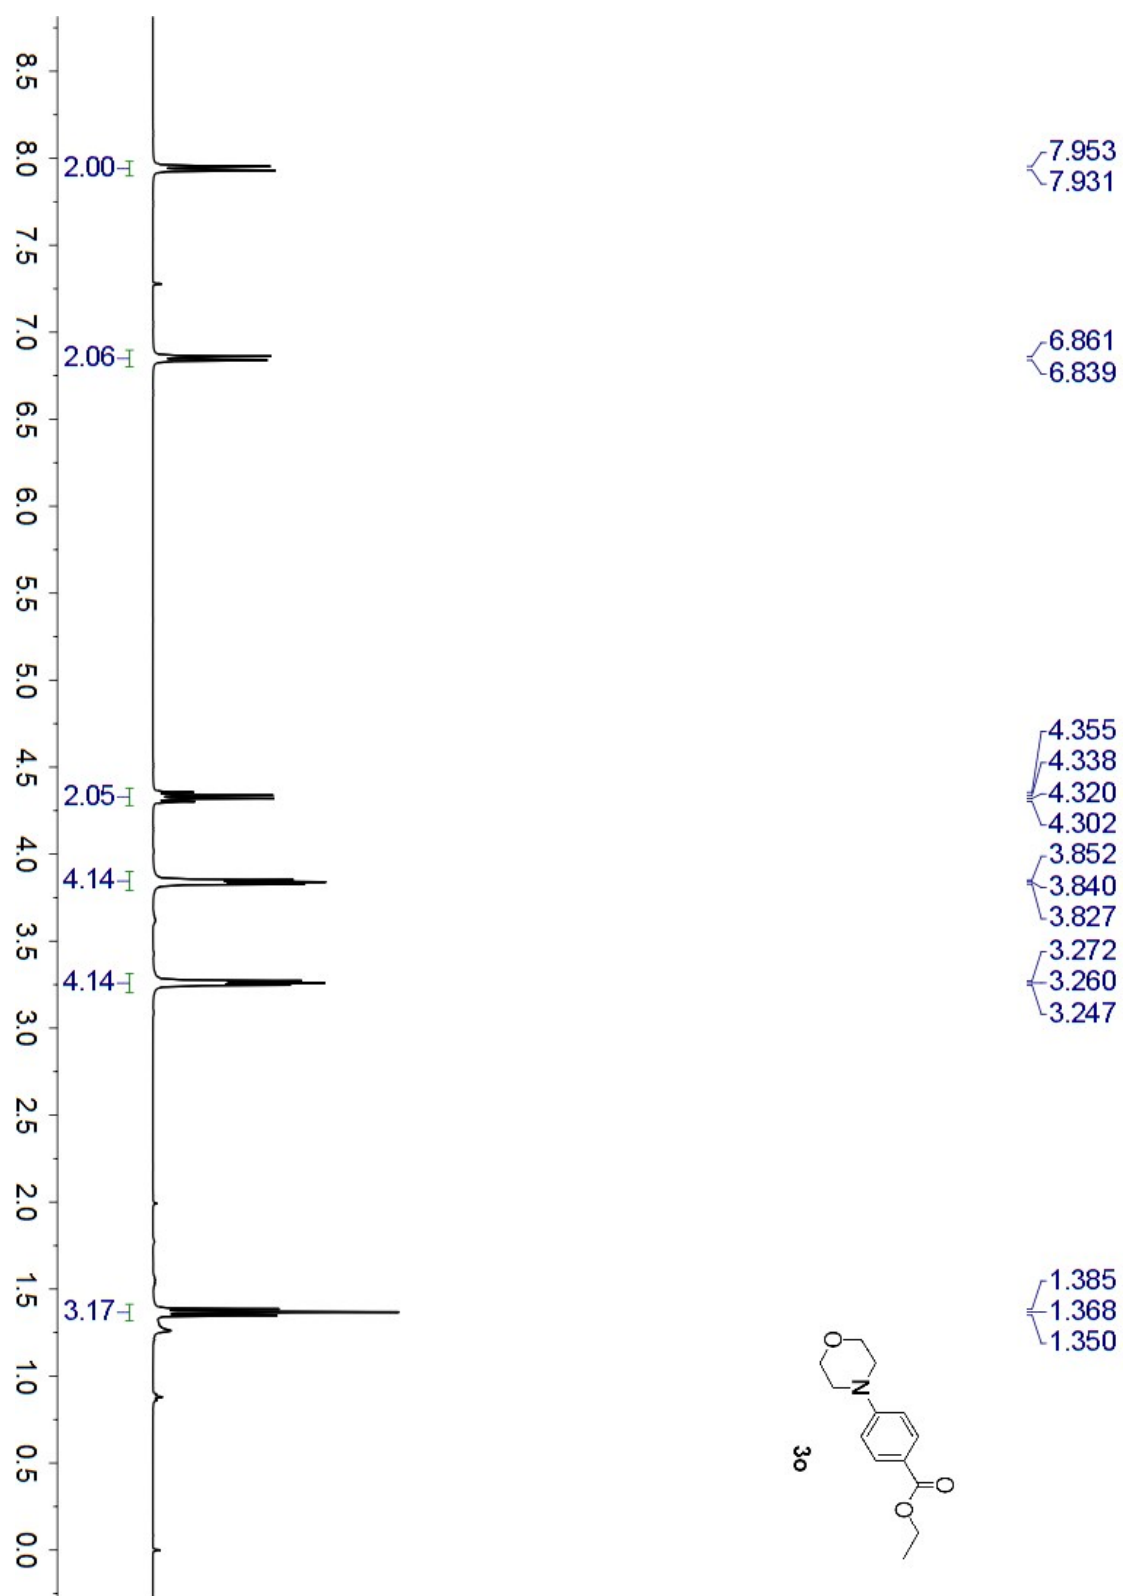

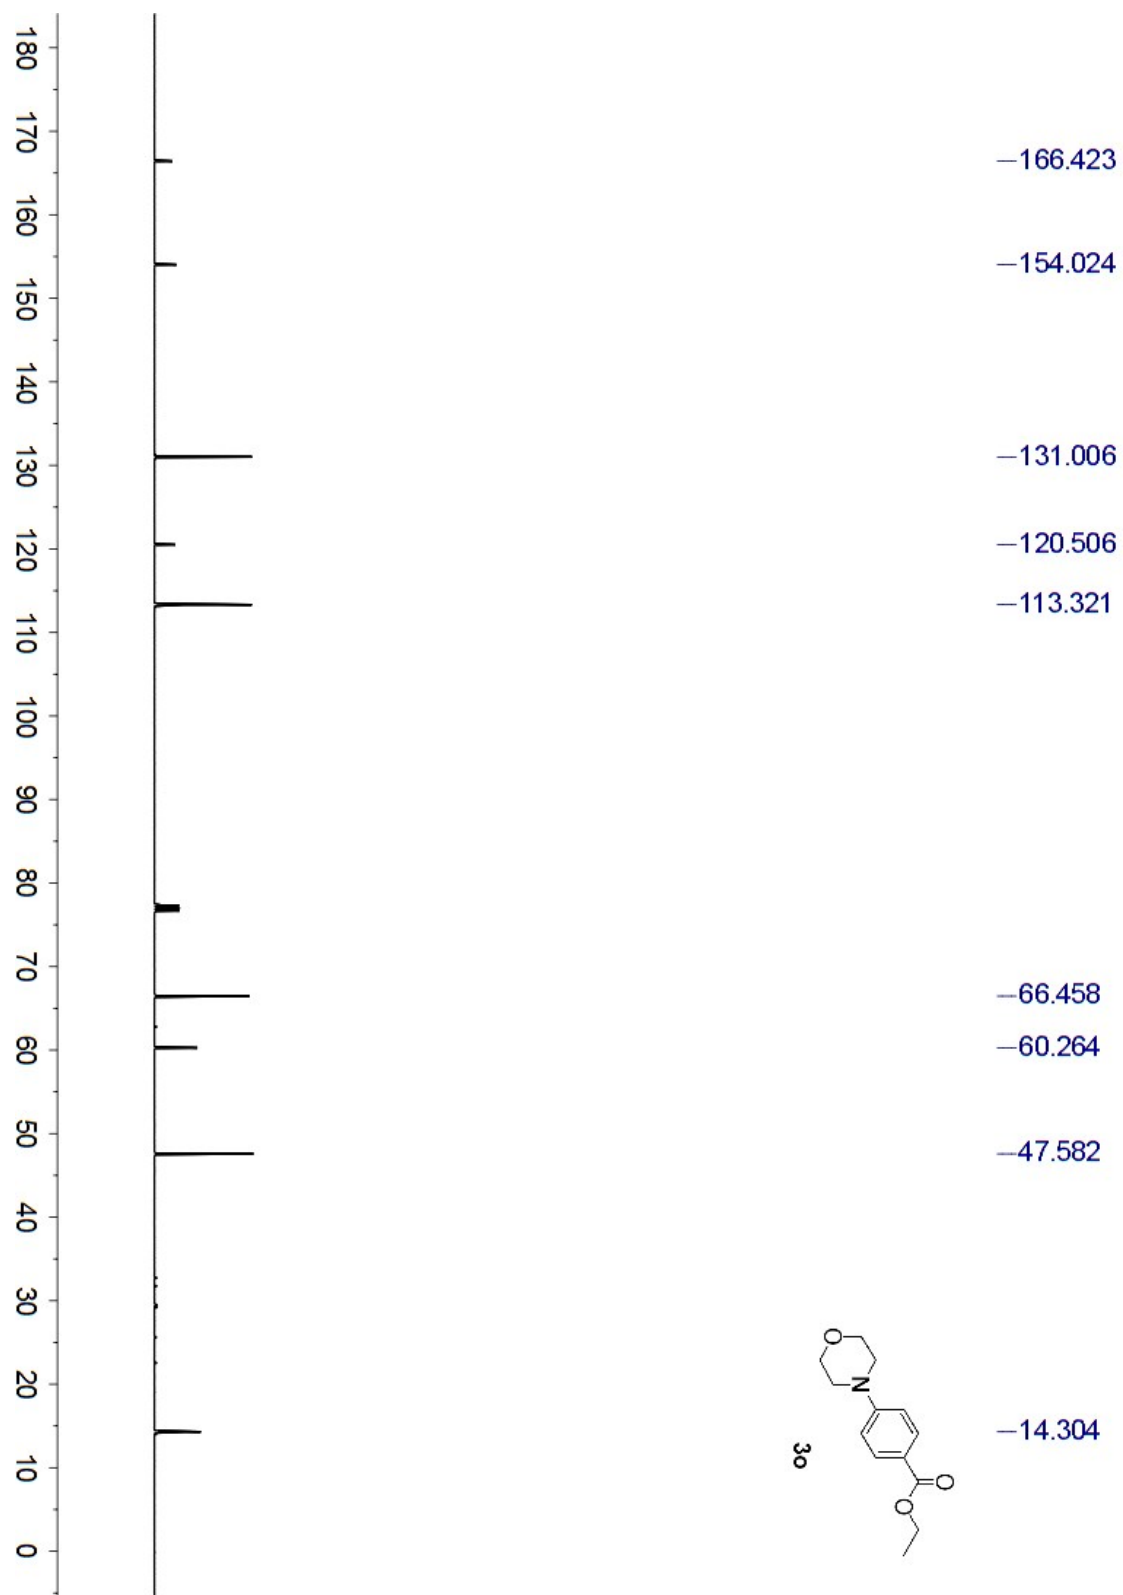

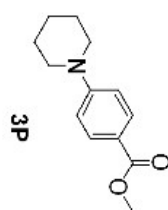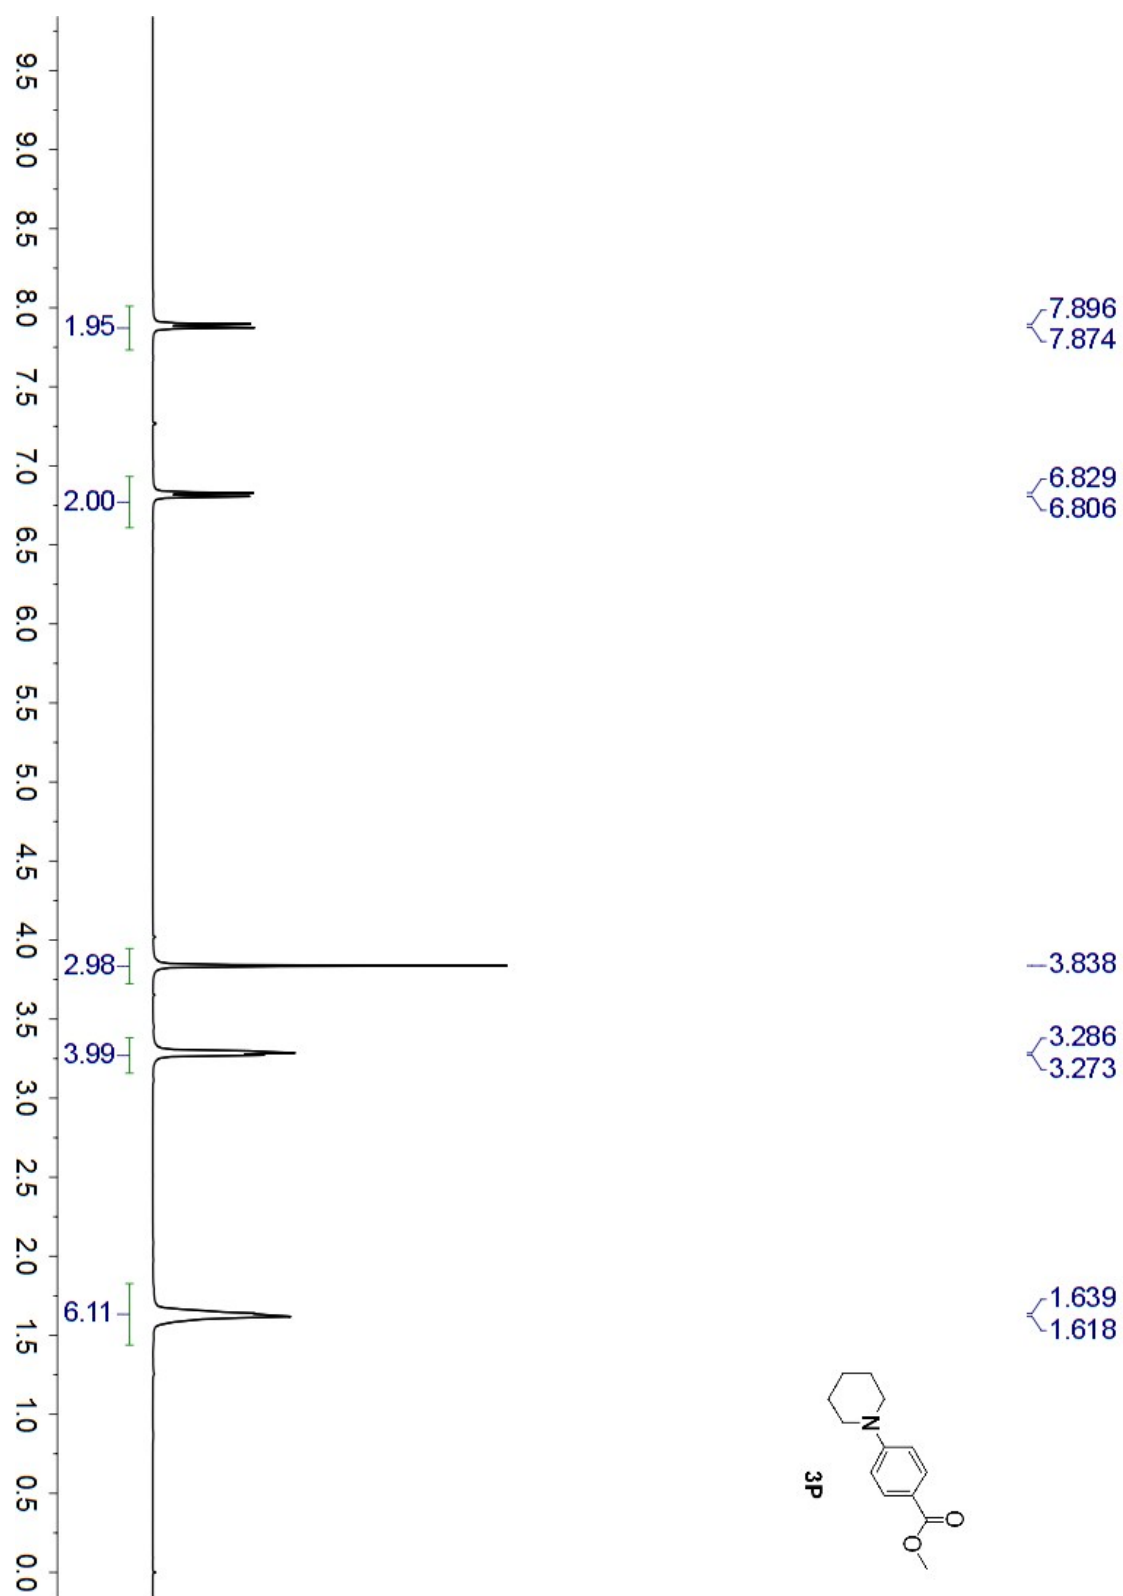

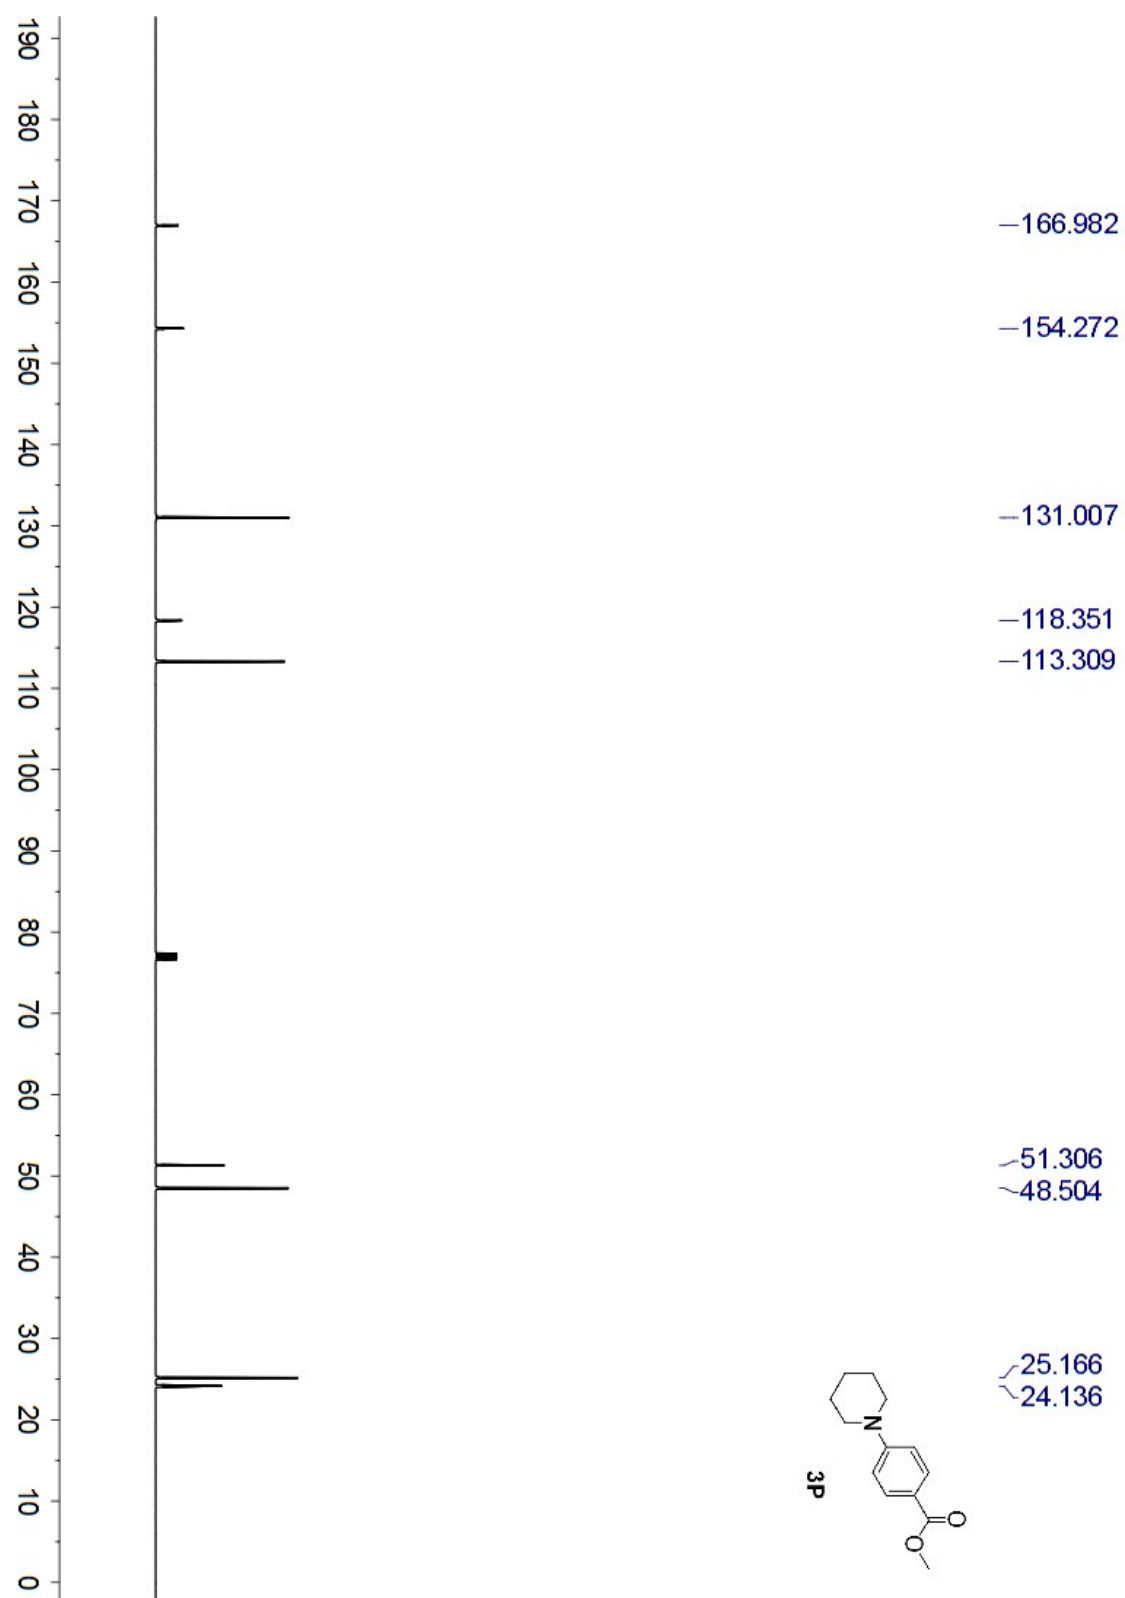

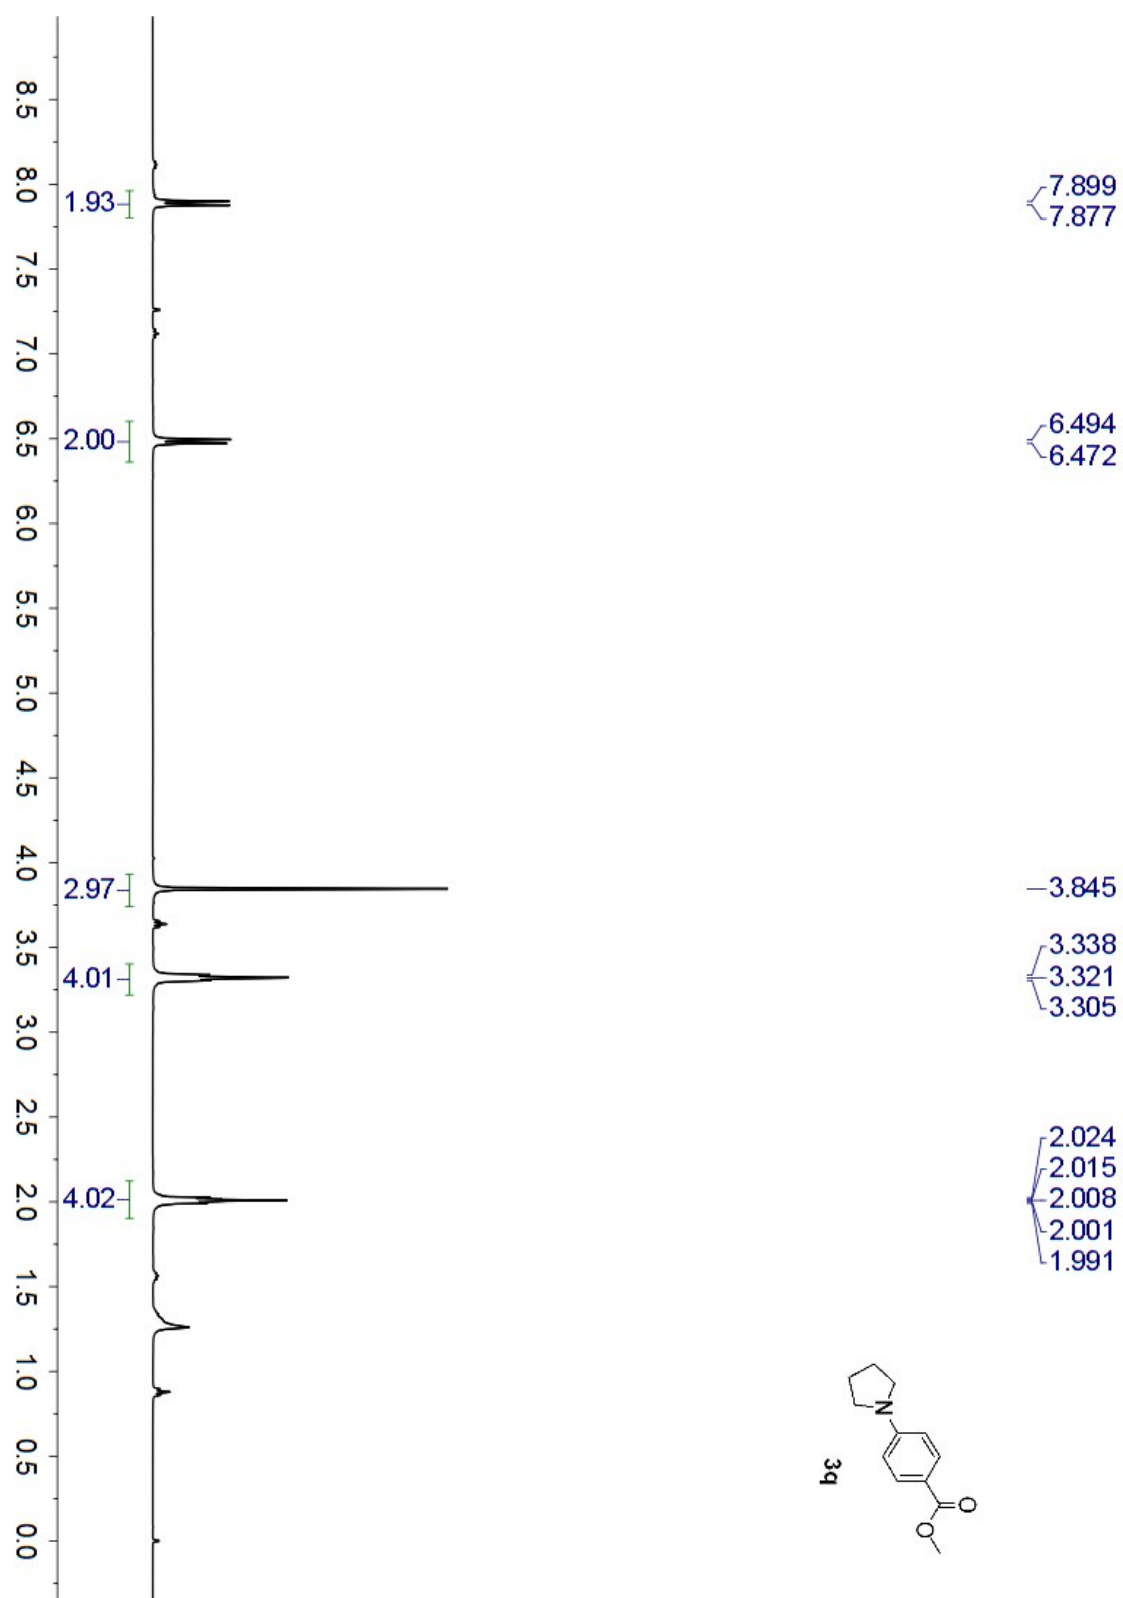

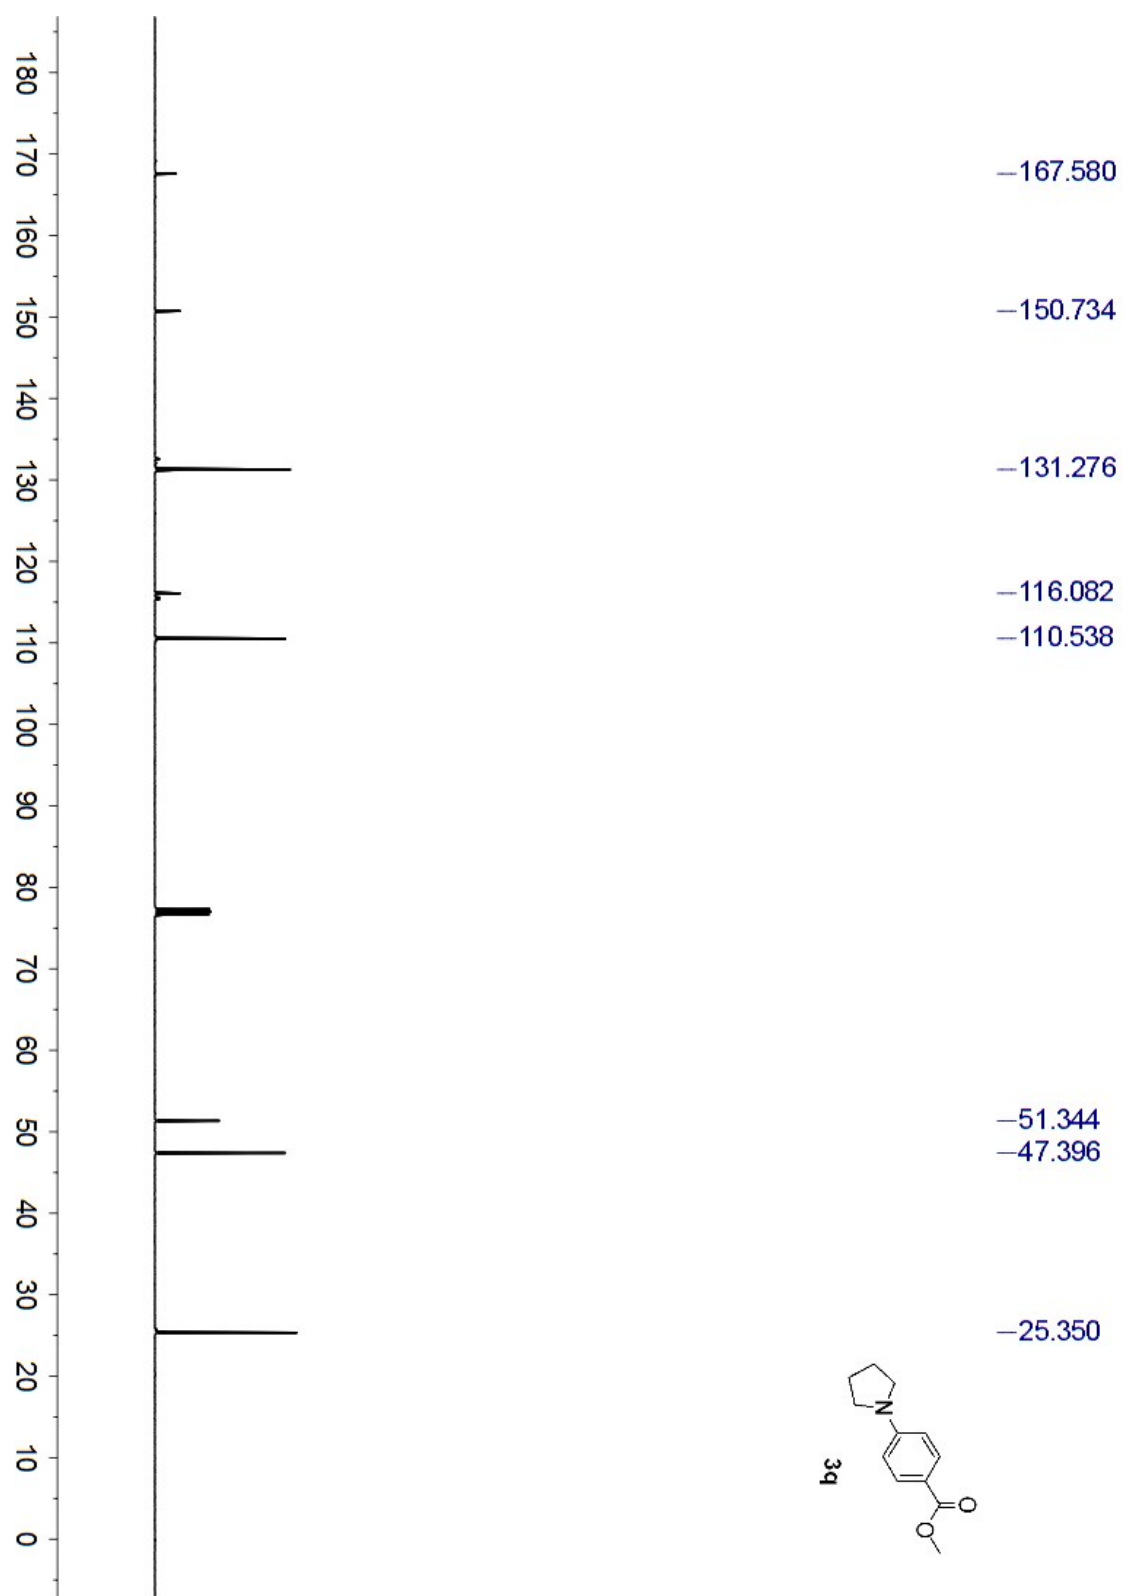

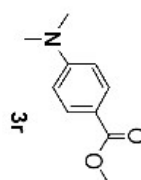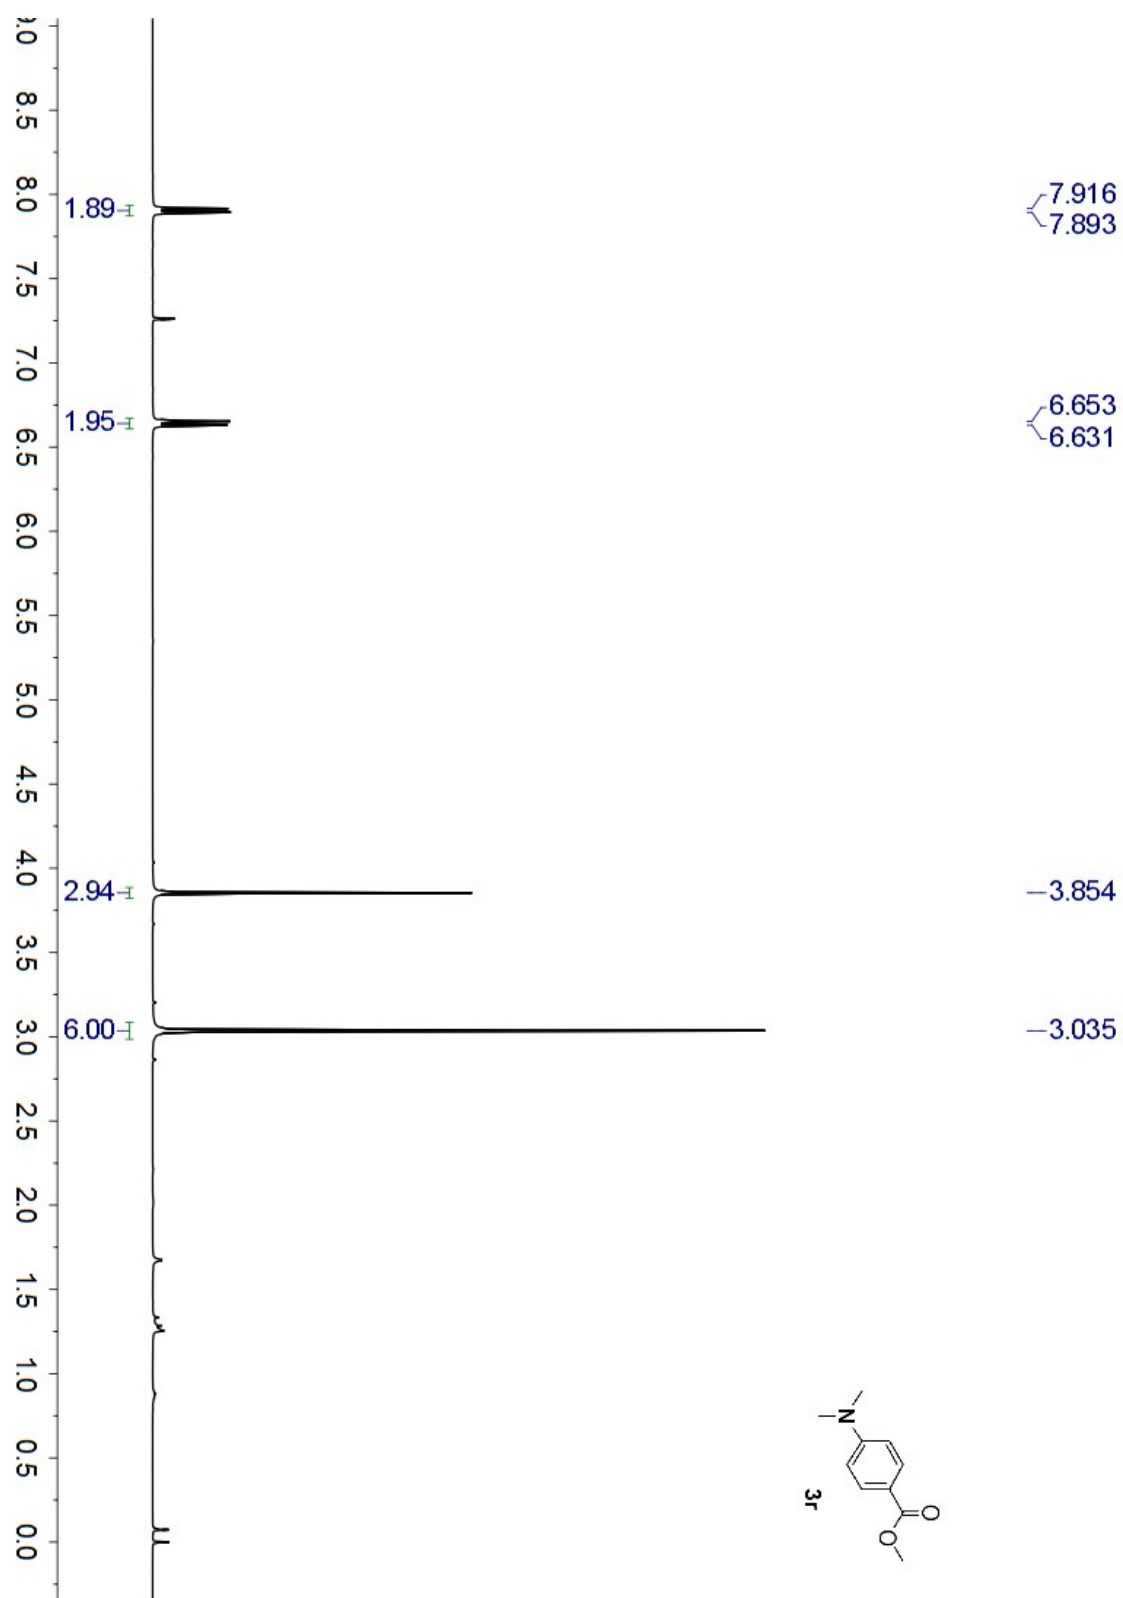

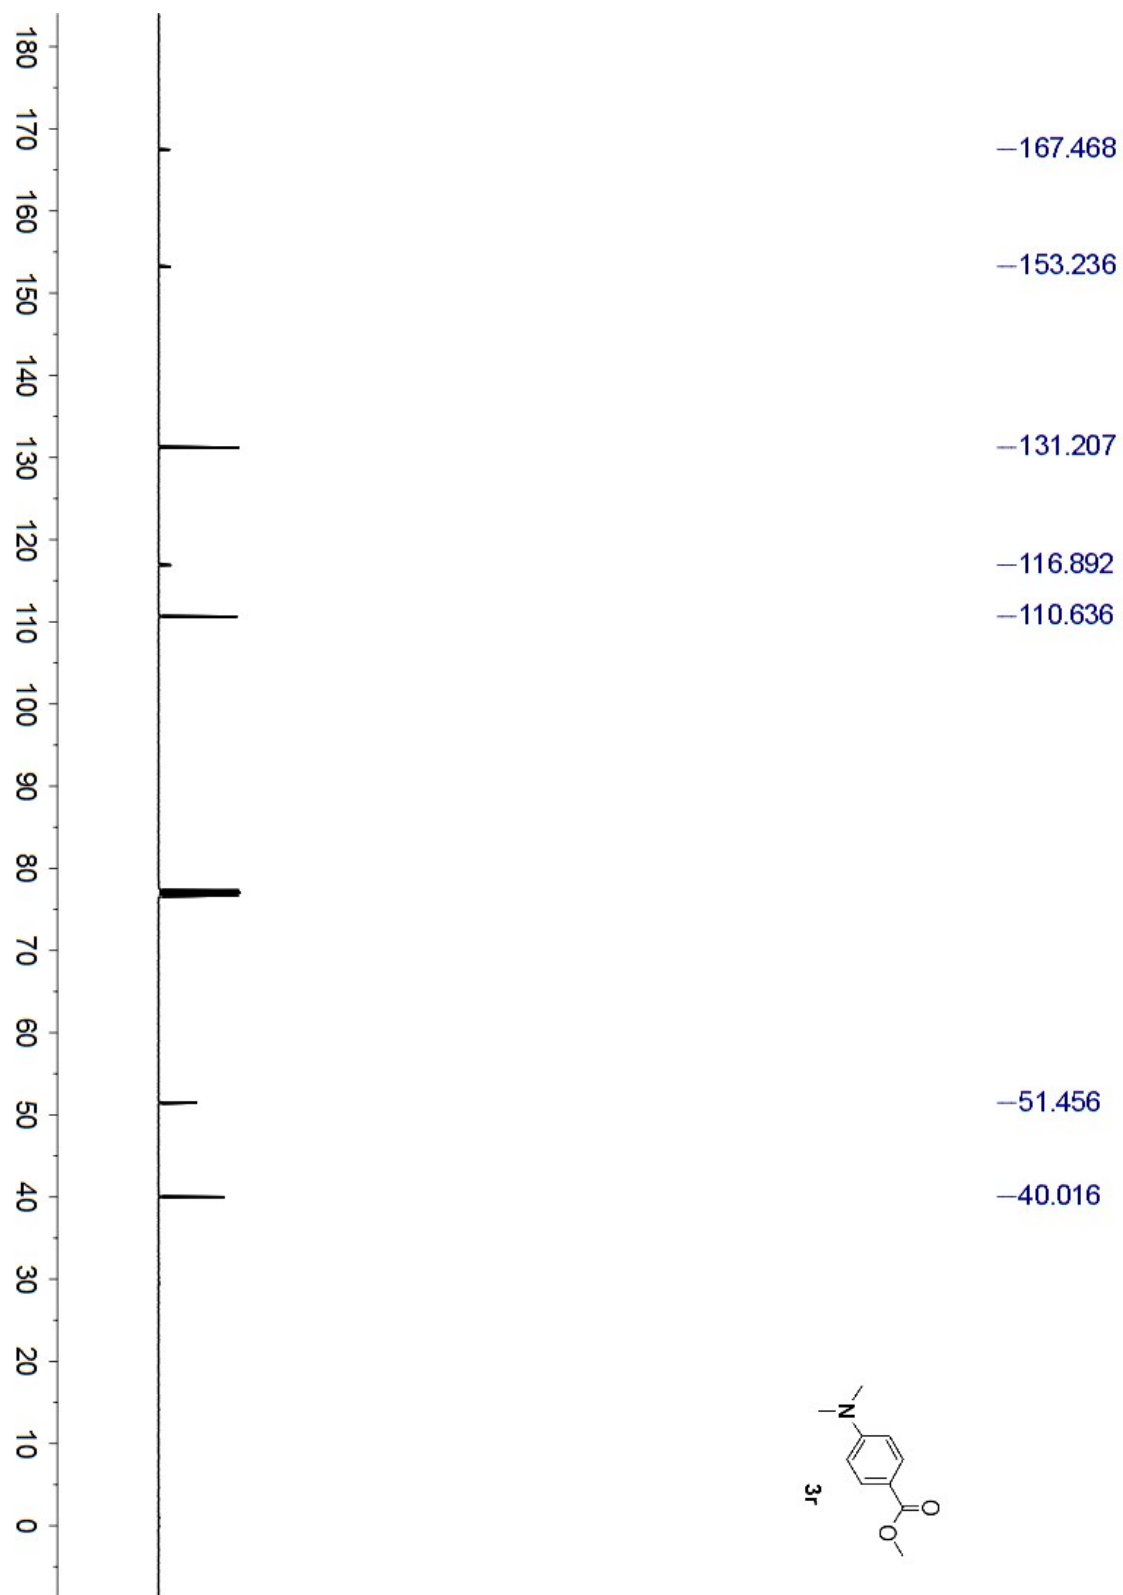

Supplement: c8ob01749b1.pdf [file c8ob01749b1.pdf]
